# Supplementary material for: Synthesis of 3-acylquinolines through Cu-catalyzed double C(sp3)–H bond functionalization of saturated ketones
Source: Royal Society of Chemistry journal article supplement (doi:10.1039/c6qo00817h), 2017-01-01

## Supporting Information

# Synthesis of 3-Acylquinolines through Cu-Catalyzed Double C(sp<sup>3</sup>)-H Bond Functionalization of Saturated Ketones

Ze Wang, Guang Chen, Xinying Zhang\*, and Xuesen Fan\*

*School of Chemistry and Chemical Engineering, Collaborative Innovation Centre of Henan Province for  
Green Manufacturing of Fine Chemicals, Key Laboratory of Green Chemical Media and Reactions,  
Ministry of Education, Henan Normal University, Xinxiang, Henan 453007, China  
E-mail: xuesen.fan@htu.cn; xinyingzhang@htu.cn*

### Table of Contents

|                                                                                                                      |    |
|----------------------------------------------------------------------------------------------------------------------|----|
| I. General experimental information.....                                                                             | 2  |
| II. Experimental procedures and spectroscopic data.....                                                              | 3  |
| III. References.....                                                                                                 | 18 |
| IV. Copies of <sup>1</sup> H and <sup>13</sup> C NMR spectra of <b>3a-3r</b> .....                                   | 19 |
| V. Copies of <sup>1</sup> H and <sup>13</sup> C NMR spectra of <b>5a-5l</b> .....                                    | 37 |
| VI. Copies of <sup>1</sup> H and <sup>13</sup> C NMR spectra of intermediates <b>C</b> , <b>D</b> and <b>G</b> ..... | 49 |

## I. General experimental information

Commercial reagents were used without further purification, and solvents were dried before using. Melting points were recorded with a micro melting point apparatus and uncorrected. The  $^1\text{H}$  NMR spectra were recorded at 400 MHz or 600 MHz. The  $^{13}\text{C}$  NMR spectra were recorded at 100 MHz or 150 MHz. Chemical shifts were expressed in parts per million ( $\delta$ ) downfield from the internal standard tetramethylsilane, and were reported as s (singlet), d (doublet), t (triplet), dd (doublet of doublet), dt (doublet of triplet), m (multiplet), br s (broad singlet), etc. The coupling constants  $J$  were given in Hz. High resolution mass spectra (HRMS) were obtained *via* ESI mode by using a MicrOTOF mass spectrometer. The conversion of starting materials was monitored by thin layer chromatography (TLC) using silica gel plates (silica gel 60 F254 0.25 mm), and components were visualized by observation under UV light (254 and 365 nm).

## II. Experimental procedures and spectroscopic data

### 1. Typical procedure for the synthesis of **3a** and spectroscopic data of **3a-3r**

To a 15 mL reaction tube equipped with a stir bar were added 2-aminobenzaldehyde (**1a**, 60.5 mg, 0.5 mmol), toluene (3.0 mL), Cu(OAc)<sub>2</sub> (9.1 mg, 0.05 mmol), 2,2'-bipyridine (15.6 mg, 0.1 mmol), TEMPO (156.1 mg, 1 mmol) and propiophenone (**2a**, 80  $\mu$ L, 0.6 mmol) with stirring. After being flushed with N<sub>2</sub>, the tube was sealed, and the mixture was stirred at 120 °C for 14 h. Upon completion, the resulting mixture was diluted with DCM (20 mL), and washed with water (10 mL) and brine (10 mL). The organic layer was dried over anhydrous Na<sub>2</sub>SO<sub>4</sub>, and evaporated under reduced pressure. The residue was purified by column chromatography on silica gel with petroleum ether/ethyl acetate (10:1) as the eluent to give **3a** (90.9 mg, 78%). **3b-3r** were obtained in a similar manner.

#### Phenyl(quinolin-3-yl)methanone (**3a**)<sup>1</sup>

Eluent: petroleum ether/ethyl acetate (10:1). White solid (90.9 mg, 78%), mp 74-76 °C (lit.<sup>1</sup> 73-75 °C).

<sup>1</sup>H NMR (400 MHz, CDCl<sub>3</sub>)  $\delta$  7.50-7.54 (m, 2H), 7.59-7.66 (m, 2H), 7.81-7.83 (m, 1H), 7.85 (dd,  $J_1 = 8.4$  Hz,  $J_2 = 1.2$  Hz, 2H), 7.89 (d,  $J = 8.4$  Hz, 1H), 8.18 (d,  $J = 8.0$  Hz, 1H), 8.53 (d,  $J = 2.0$  Hz, 1H), 9.32 (d,  $J = 2.4$  Hz, 1H). <sup>13</sup>C NMR (100 MHz, CDCl<sub>3</sub>)  $\delta$  126.6, 127.6, 128.6, 129.2, 129.5, 130.0, 131.8, 133.1, 137.0, 138.8, 149.5, 150.3, 194.8. MS:  $m/z$  234 [M+H]<sup>+</sup>.

#### (6-Chloroquinolin-3-yl)(phenyl)methanone (**3b**)

Eluent: petroleum ether/ethyl acetate (10:1). White solid (100.1 mg, 75%), mp 121-123 °C. <sup>1</sup>H NMR (400 MHz, CDCl<sub>3</sub>)  $\delta$  7.54 (t,  $J = 8.0$  Hz, 2H), 7.67 (t,  $J = 7.6$  Hz, 1H), 7.76 (dd,  $J_1 = 8.8$  Hz,  $J_2 = 2.0$  Hz, 1H), 7.86 (d,  $J = 7.6$  Hz, 2H), 7.89 (d,  $J = 2.4$  Hz, 1H), 8.12 (d,  $J = 8.8$  Hz, 1H), 8.45 (d,  $J = 2.0$  Hz, 1H), 9.29 (d,  $J = 2.0$  Hz, 1H). <sup>13</sup>C NMR (100 MHz, CDCl<sub>3</sub>)  $\delta$  127.3, 127.6, 128.7, 130.1, 130.9, 131.1, 132.7, 133.3, 133.5, 136.8, 137.6, 147.8, 150.5, 194.5. HRMS calcd for C<sub>16</sub>H<sub>11</sub>ClNO: 268.0524 [M+H]<sup>+</sup>, found: 268.0528.

**[1,3]Dioxolo[4,5-g]quinolin-7-yl(phenyl)methanone (3c)**

Eluent: petroleum ether/ethyl acetate (5:1). Yellow solid (109.4 mg, 79%), mp 119-120 °C. <sup>1</sup>H NMR (600 MHz, CDCl<sub>3</sub>) δ 6.15 (s, 2H), 7.09 (s, 1H), 7.41 (s, 1H), 7.52 (t, *J* = 7.8 Hz, 2H), 7.63 (t, *J* = 7.8 Hz, 1H), 7.83 (d, *J* = 7.8 Hz, 2H), 8.35 (d, *J* = 1.8 Hz, 1H), 9.08 (d, *J* = 1.8 Hz, 1H). <sup>13</sup>C NMR (150 MHz, CDCl<sub>3</sub>) δ 102.3, 103.7, 105.9, 123.9, 128.56, 128.59, 130.0, 132.8, 137.2, 137.3, 148.4, 148.6, 148.7, 152.8, 194.9. HRMS calcd for C<sub>17</sub>H<sub>12</sub>NO<sub>3</sub>: 278.0812 [M+H]<sup>+</sup>, found: 278.0820.

**(7-Methoxyquinolin-3-yl)(phenyl)methanone (3d)<sup>2</sup>**

Eluent: petroleum ether/ethyl acetate (5:1). Yellow solid (110.5 mg, 84%), mp 84-85 °C (lit.<sup>2</sup> 79-80 °C). <sup>1</sup>H NMR (600 MHz, CDCl<sub>3</sub>) δ 3.97 (s, 3H), 7.25 (dd, *J*<sub>1</sub> = 7.8 Hz, *J*<sub>2</sub> = 1.8 Hz, 1H), 7.47 (d, *J* = 2.4 Hz, 1H), 7.52 (t, *J* = 7.8 Hz, 2H), 7.63 (t, *J* = 7.8 Hz, 1H), 7.76 (d, *J* = 9.0 Hz, 1H), 7.84 (d, *J* = 7.8 Hz, 2H), 8.47 (d, *J* = 1.8 Hz, 1H), 9.25 (d, *J* = 1.8 Hz, 1H). <sup>13</sup>C NMR (150 MHz, CDCl<sub>3</sub>) δ 55.7, 107.4, 120.9, 121.7, 128.0, 128.6, 129.9, 130.3, 132.8, 137.3, 138.5, 150.9, 151.6, 162.7, 194.8. MS: m/z 264 [M+H]<sup>+</sup>.

**(6,7-Dimethoxyquinolin-3-yl)(phenyl)methanone (3e)<sup>2</sup>**

Eluent: petroleum ether/ethyl acetate (3:1). Yellow solid (126.0 mg, 86%), mp 144-145 °C (lit.<sup>2</sup> 142-143 °C). <sup>1</sup>H NMR (400 MHz, CDCl<sub>3</sub>) δ 4.02 (s, 3H), 4.07 (s, 3H), 7.12 (s, 1H), 7.48 (s, 1H), 7.51-7.55 (m, 2H), 7.61-7.65 (m, 1H), 7.84-7.86 (m, 2H), 8.42 (d, *J* = 2.0 Hz, 1H), 9.13 (d, *J* = 2.0 Hz, 1H). <sup>13</sup>C NMR (100 MHz, CDCl<sub>3</sub>) δ 56.1, 56.3, 106.1, 107.9, 122.3, 128.5, 129.9, 132.7, 136.8, 137.5, 147.1, 148.6, 150.5, 154.4, 195.1. MS: m/z 294 [M+H]<sup>+</sup>.

**(4-Bromophenyl)(quinolin-3-yl)methanone (3f)<sup>1</sup>**

Eluent: petroleum ether/ethyl acetate (10:1). White solid (110.4 mg, 71%), mp 118-119 °C (lit.<sup>1</sup> 115-117 °C). <sup>1</sup>H NMR (600 MHz, CDCl<sub>3</sub>) δ 7.64 (d, *J* = 7.8 Hz, 1H), 7.67 (d, *J* = 8.4 Hz, 2H), 7.73 (d, *J* = 8.4 Hz, 2H), 7.85 (t, *J* = 8.4 Hz, 1H), 7.91 (d, *J* = 7.8 Hz, 1H), 8.18 (d, *J* = 9.0 Hz, 1H), 8.51 (d, *J* = 1.8 Hz,

1H), 9.29 (d,  $J = 1.8$  Hz, 1H).  $^{13}\text{C}$  NMR (150 MHz,  $\text{CDCl}_3$ )  $\delta$  126.5, 127.7, 128.3, 129.2, 129.5, 129.6, 131.5, 132.01, 132.04, 135.7, 138.7, 149.6, 150.1, 193.8. MS:  $m/z$  312  $[\text{M}+\text{H}]^+$ .

### Quinolin-3-yl(4-(trifluoromethyl)phenyl)methanone (3g)

Eluent: petroleum ether/ethyl acetate (10:1). Yellow solid (108.4 mg, 72%), mp 116-117 °C.  $^1\text{H}$  NMR (400 MHz,  $\text{CDCl}_3$ )  $\delta$  7.65-7.69 (m, 1H), 7.82 (d,  $J = 8.4$  Hz, 2H), 7.86-7.91 (m, 1H), 7.93 (d,  $J = 8.4$  Hz, 1H), 7.97 (d,  $J = 8.0$  Hz, 2H), 8.21 (d,  $J = 8.8$  Hz, 1H), 8.55 (d,  $J = 2.0$  Hz, 1H), 9.33 (d,  $J = 2.0$  Hz, 1H).  $^{13}\text{C}$  NMR (150 MHz,  $\text{CDCl}_3$ )  $\delta$  123.6 (q,  $^1J_{\text{C-F}} = 271.2$  Hz), 125.7 (q,  $^3J_{\text{C-F}} = 4.5$  Hz), 126.5, 127.9, 129.2, 129.3, 129.6, 130.2, 132.3, 134.4 (q,  $^2J_{\text{C-F}} = 32.9$  Hz), 139.1, 140.1, 149.7, 150.1, 193.8. HRMS calcd for  $\text{C}_{17}\text{H}_{11}\text{F}_3\text{NO}$ : 302.0787  $[\text{M}+\text{H}]^+$ , found: 302.0807.

### Quinolin-3-yl(p-tolyl)methanone (3h) <sup>3</sup>

Eluent: petroleum ether/ethyl acetate (10:1). White solid (97.6 mg, 79%), mp 93-94 °C.  $^1\text{H}$  NMR (400 MHz,  $\text{CDCl}_3$ )  $\delta$  2.45 (s, 3H), 7.30-7.33 (m, 2H), 7.59-7.63 (m, 1H), 7.77 (d,  $J = 8.0$  Hz, 2H), 7.80-7.84 (m, 1H), 7.89 (d,  $J = 8.0$  Hz, 1H), 8.17 (d,  $J = 8.4$  Hz, 1H), 8.51 (d,  $J = 2.0$  Hz, 1H), 9.30 (d,  $J = 2.0$  Hz, 1H).  $^{13}\text{C}$  NMR (100 MHz,  $\text{CDCl}_3$ )  $\delta$  21.7, 126.6, 127.5, 129.1, 129.3, 129.5, 130.3, 130.4, 131.7, 134.4, 138.5, 144.0, 149.4, 150.4, 194.5. MS:  $m/z$  248  $[\text{M}+\text{H}]^+$ .

### (4-Methoxyphenyl)(quinolin-3-yl)methanone (3i) <sup>3</sup>

Eluent: petroleum ether/ethyl acetate (5:1). White solid (109.2 mg, 83%), mp 132-133 °C.  $^1\text{H}$  NMR (400 MHz,  $\text{CDCl}_3$ )  $\delta$  3.90 (s, 3H), 7.01 (dt,  $J_1 = 8.8$  Hz,  $J_2 = 2.0$  Hz, 2H), 7.61-7.65 (m, 1H), 7.81-7.85 (m, 1H), 7.88 (dd,  $J_1 = 6.8$  Hz,  $J_2 = 2.0$  Hz, 2H), 7.91 (d,  $J = 8.4$  Hz, 1H), 8.19 (d,  $J = 8.4$  Hz, 1H), 8.51 (d,  $J = 2.0$  Hz, 1H), 9.28 (d,  $J = 2.4$  Hz, 1H).  $^{13}\text{C}$  NMR (100 MHz,  $\text{CDCl}_3$ )  $\delta$  55.6, 114.0, 126.7, 127.5, 129.0, 129.5, 129.7, 130.8, 131.6, 132.6, 138.2, 149.3, 150.3, 163.7, 193.5. MS:  $m/z$  264  $[\text{M}+\text{H}]^+$ .

### Pyridin-3-yl(quinolin-3-yl)methanone (3j)

Eluent: petroleum ether/ethyl acetate (3:1). Brown yellow solid (73.7 mg, 63%), mp 81-82 °C.  $^1\text{H}$  NMR (400 MHz,  $\text{CDCl}_3$ )  $\delta$  7.52 (dd,  $J_1 = 8.0$  Hz,  $J_2 = 4.8$  Hz, 1H), 7.66 (t,  $J = 7.6$  Hz, 1H), 7.88 (td,  $J_1 = 8.4$  Hz,

$J_2 = 1.2$  Hz, 1H), 7.93 (d,  $J = 8.0$  Hz, 1H), 8.19-8.21 (m, 2H), 8.56 (d,  $J = 2.0$  Hz, 1H), 8.88 (dd,  $J_1 = 4.8$  Hz,  $J_2 = 1.6$  Hz, 1H), 9.08 (d,  $J = 2.0$  Hz, 1H), 9.34 (d,  $J = 2.4$  Hz, 1H).  $^{13}\text{C}$  NMR (100 MHz,  $\text{CDCl}_3$ )  $\delta$  123.7, 126.4, 127.9, 129.1, 129.2, 129.6, 132.3, 132.6, 137.1, 139.0, 149.7, 149.9, 150.8, 153.4, 193.1. HRMS calcd for  $\text{C}_{15}\text{H}_{11}\text{N}_2\text{O}$ : 235.0866  $[\text{M}+\text{H}]^+$ , found: 235.0878.

### **Quinolin-3-yl(thiophen-2-yl)methanone (3k)**<sup>1</sup>

Eluent: petroleum ether/ethyl acetate (5:1). Yellow solid (89.6 mg, 75%), mp 86-87 °C (lit.<sup>1</sup> 89-91 °C).  $^1\text{H}$  NMR (600 MHz,  $\text{CDCl}_3$ )  $\delta$  7.22 (dd,  $J_1 = 4.8$  Hz,  $J_2 = 3.6$  Hz, 1H), 7.63-7.65 (m, 1H), 7.71 (dd,  $J_1 = 4.2$  Hz,  $J_2 = 0.6$  Hz, 1H), 7.79 (dd,  $J_1 = 4.8$  Hz,  $J_2 = 1.2$  Hz, 1H), 7.83-7.85 (m, 1H), 7.94 (td,  $J_1 = 7.8$  Hz,  $J_2 = 0.6$  Hz, 1H), 8.18 (d,  $J = 8.4$  Hz, 1H), 8.64 (d,  $J = 2.4$  Hz, 1H), 9.34 (d,  $J = 1.8$  Hz, 1H).  $^{13}\text{C}$  NMR (150 MHz,  $\text{CDCl}_3$ )  $\delta$  126.6, 127.7, 128.4, 129.1, 129.5, 130.7, 131.8, 135.08, 135.10, 137.7, 143.2, 149.5, 149.6, 186.2. MS:  $m/z$  240  $[\text{M}+\text{H}]^+$ .

### **1-(Quinolin-3-yl)ethanone (3l)**<sup>1</sup>

Eluent: petroleum ether/ethyl acetate (5:1). Yellow solid (24.8 mg, 29%), mp 95-96 °C (lit.<sup>1</sup> 98-99 °C).  $^1\text{H}$  NMR (600 MHz,  $\text{CDCl}_3$ )  $\delta$  2.74 (s, 3H), 7.63 (t,  $J = 7.8$  Hz, 1H), 7.83-7.85 (m, 1H), 7.95 (d,  $J = 8.4$  Hz, 1H), 8.16 (d,  $J = 8.4$  Hz, 1H), 8.70 (d,  $J = 2.4$  Hz, 1H), 9.43 (d,  $J = 2.4$  Hz, 1H).  $^{13}\text{C}$  NMR (150 MHz,  $\text{CDCl}_3$ )  $\delta$  26.8, 126.8, 127.6, 129.3, 129.4, 129.5, 132.0, 137.4, 149.2, 149.8, 196.8. MS:  $m/z$  172  $[\text{M}+\text{H}]^+$ .

### **Cyclohexyl(quinolin-3-yl)methanone (3m)**<sup>3</sup>

Eluent: petroleum ether/ethyl acetate (10:1). Yellow solid (41.8 mg, 35%), mp 61-62 °C.  $^1\text{H}$  NMR (600 MHz,  $\text{CDCl}_3$ )  $\delta$  1.27-1.33 (m, 1H), 1.41-1.49 (m, 2H), 1.53-1.60 (m, 2H), 1.75-1.78 (m, 1H), 1.86-1.90 (m, 2H), 1.96 (d,  $J = 13.2$  Hz, 2H), 3.37 (tt,  $J_1 = 11.4$  Hz,  $J_2 = 3.6$  Hz, 1H), 7.61 (t,  $J = 7.8$  Hz, 1H), 7.81 (td,  $J_1 = 7.8$  Hz,  $J_2 = 1.2$  Hz, 1H), 7.94 (d,  $J = 7.8$  Hz, 1H), 8.15 (d,  $J = 8.4$  Hz, 1H), 8.68 (d,  $J = 1.8$  Hz,

1H), 9.41 (d,  $J = 1.8$  Hz, 1H).  $^{13}\text{C}$  NMR (150 MHz,  $\text{CDCl}_3$ )  $\delta$  25.7, 25.9, 29.2, 46.0, 126.9, 127.4, 128.4, 129.3, 129.4, 131.8, 137.0, 149.5, 149.7, 202.5. MS:  $m/z$  240  $[\text{M}+\text{H}]^+$ .

**(2-Methylquinolin-3-yl)(phenyl)methanone (3n)**<sup>4</sup>

Eluent: petroleum ether/ethyl acetate (10:1). Yellow solid (56.8 mg, 46%), mp 134-136 °C (lit.<sup>4</sup> 131-133 °C).  $^1\text{H}$  NMR (600 MHz,  $\text{CDCl}_3$ )  $\delta$  2.75 (s, 3H), 7.49 (t,  $J = 7.8$  Hz, 2H), 7.54 (t,  $J = 7.8$  Hz, 1H), 7.63 (t,  $J = 7.8$  Hz, 1H), 7.76-7.79 (m, 2H), 7.85 (d,  $J = 7.2$  Hz, 2H), 8.09 (d,  $J = 8.4$  Hz, 1H), 8.11 (s, 1H).  $^{13}\text{C}$  NMR (100 MHz,  $\text{CDCl}_3$ )  $\delta$  24.3, 125.3, 126.7, 128.1, 128.7, 128.8, 130.2, 131.1, 132.2, 133.7, 136.8, 137.3, 148.1, 156.7, 196.7. MS:  $m/z$  248  $[\text{M}+\text{H}]^+$ .

**Phenyl(2-phenylquinolin-3-yl)methanone (3o)**<sup>5</sup>

Eluent: petroleum ether/ethyl acetate (10:1). White solid (123.6 mg, 80%), mp 138-139 °C (lit.<sup>5</sup> 135-137 °C).  $^1\text{H}$  NMR (400 MHz,  $\text{CDCl}_3$ )  $\delta$  7.23-7.31 (m, 5H), 7.41-7.45 (m, 1H), 7.55-7.59 (m, 1H), 7.63 (dd,  $J_1 = 8.0$  Hz,  $J_2 = 1.2$  Hz, 2H), 7.69-7.71 (m, 2H), 7.78-7.82 (m, 1H), 7.86 (d,  $J = 8.0$  Hz, 1H), 8.24 (d,  $J = 8.8$  Hz, 1H), 8.31 (s, 1H).  $^{13}\text{C}$  NMR (100 MHz,  $\text{CDCl}_3$ )  $\delta$  125.8, 127.3, 128.2, 128.4, 128.9, 129.3, 129.7, 130.0, 131.2, 132.9, 133.4, 137.1, 137.6, 139.8, 148.4, 157.5, 196.9. MS:  $m/z$  310  $[\text{M}+\text{H}]^+$ .

**11H-Indeno[1,2-*b*]quinolin-11-one (3p)**<sup>4</sup>

Eluent: petroleum ether/ethyl acetate (5:1). Yellow solid (42.7 mg, 37%), mp 169-171 °C (lit.<sup>4</sup> 172-174 °C).  $^1\text{H}$  NMR (600 MHz,  $\text{CDCl}_3$ )  $\delta$  7.36 (t,  $J = 7.8$  Hz, 1H), 7.54-7.59 (m, 2H), 7.63-7.66 (m, 2H), 7.75 (t,  $J = 7.2$  Hz, 2H), 8.06 (s, 1H), 8.20 (d,  $J = 9.0$  Hz, 1H).  $^{13}\text{C}$  NMR (150 MHz,  $\text{CDCl}_3$ )  $\delta$  121.6, 124.9, 126.2, 128.5, 129.2, 129.5, 129.9, 130.1, 131.7, 133.7, 134.3, 136.1, 142.6, 148.6, 154.3, 192.3. MS:  $m/z$  232  $[\text{M}+\text{H}]^+$ .

**(1,8-Naphthyridin-3-yl)(phenyl)methanone (3q)**

Eluent: petroleum ether/ethyl acetate (1:1). White solid (101.8 mg, 87%), mp 102-103 °C.  $^1\text{H}$  NMR (600 MHz,  $\text{CDCl}_3$ )  $\delta$  7.56 (t,  $J = 7.8$  Hz, 2H), 7.62 (q,  $J = 4.2$  Hz, 1H), 7.68 (t,  $J = 7.8$  Hz, 1H), 7.87 (d,  $J = 7.2$  Hz, 2H), 8.34 (dd,  $J_1 = 8.4$  Hz,  $J_2 = 1.8$  Hz, 1H), 8.62 (d,  $J = 1.8$  Hz, 1H), 9.24 (q,  $J = 1.8$  Hz, 1H), 9.51

(d,  $J = 2.4$  Hz, 1H).  $^{13}\text{C}$  NMR (150 MHz,  $\text{CDCl}_3$ )  $\delta$  121.4, 123.2, 128.8, 130.0, 131.1, 133.4, 136.6, 138.4, 139.7, 153.6, 155.7, 157.1, 194.1. HRMS calcd for  $\text{C}_{15}\text{H}_{10}\text{N}_2\text{NaO}$ : 257.0685  $[\text{M}+\text{Na}]^+$ , found: 257.0692.

### **(1,8-Naphthyridin-3-yl)(pyridin-3-yl)methanone (3r)**

Eluent: petroleum ether/ethyl acetate (1:2). White solid (96.4 mg, 82%), mp 97-98 °C.  $^1\text{H}$  NMR (400 MHz,  $\text{CDCl}_3$ )  $\delta$  7.56 (dd,  $J_1 = 8.0$  Hz,  $J_2 = 4.8$  Hz, 1H), 7.66 (q,  $J = 4.0$  Hz, 1H), 8.22 (dt,  $J_1 = 7.6$  Hz,  $J_2 = 2.0$  Hz, 1H), 8.37 (dd,  $J_1 = 8.0$  Hz,  $J_2 = 2.0$  Hz, 1H), 8.66 (d,  $J = 2.8$  Hz, 1H), 8.62 (dd,  $J_1 = 4.8$  Hz,  $J_2 = 1.6$  Hz, 1H), 9.09 (d,  $J = 1.6$  Hz, 1H), 9.28 (dd,  $J_1 = 4.0$  Hz,  $J_2 = 1.6$  Hz, 1H), 9.54 (d,  $J = 2.8$  Hz, 1H).  $^{13}\text{C}$  NMR (100 MHz,  $\text{CDCl}_3$ )  $\delta$  121.4, 123.4, 123.8, 130.2, 132.3, 137.2, 138.5, 140.0, 150.8, 153.2, 153.7, 156.1, 157.3, 192.4. HRMS calcd for  $\text{C}_{14}\text{H}_{10}\text{N}_3\text{O}$ : 236.0818  $[\text{M}+\text{H}]^+$ , found: 236.0819.

## **2. Typical procedure for the synthesis of 5a and spectroscopic data of 5a-5l**

To a 15 mL reaction tube equipped with a stir bar were added (2-aminophenyl)(phenyl)methanone (**4a**, 98.5 mg, 0.5 mmol), toluene (3.0 mL),  $\text{Cu}(\text{OAc})_2$  (9.1 mg, 0.05 mmol), 2,2'-bipyridine (15.6 mg, 0.1 mmol), TEMPO (156.1 mg, 1 mmol) and propiophenone (**2a**, 80  $\mu\text{L}$ , 0.6 mmol) with stirring. After being flushed with  $\text{N}_2$ , the tube was sealed, and the mixture was stirred at 120 °C for 36 h. Upon completion, the resulting mixture was diluted with DCM (20 mL), and washed with water (10 mL) and brine (10 mL). The organic layer was dried over anhydrous  $\text{Na}_2\text{SO}_4$ , and evaporated under reduced pressure. The residue was purified by column chromatography on silica gel with petroleum ether/ethyl acetate (10:1) as the eluent to give **5a** (142.2 mg, 92%). **5b-5l** were obtained in a similar manner.

### **Phenyl(4-phenylquinolin-3-yl)methanone (5a)**<sup>1</sup>

Eluent: petroleum ether/ethyl acetate (10:1). Yellow solid (142.2 mg, 92%), mp 105-107 °C (lit.<sup>1</sup> 108-110 °C).  $^1\text{H}$  NMR (600 MHz,  $\text{CDCl}_3$ )  $\delta$  7.25-7.28 (m, 7H), 7.41 (d,  $J = 7.2$  Hz, 1H), 7.53 (t,  $J = 7.8$  Hz, 1H), 7.61 (d,  $J = 7.2$  Hz, 2H), 7.79 (t,  $J = 8.4$  Hz, 2H), 8.24 (d,  $J = 8.4$  Hz, 1H), 9.00 (s, 1H).  $^{13}\text{C}$  NMR



(150 MHz, CDCl<sub>3</sub>)  $\delta$  126.5, 126.8, 127.6, 128.3, 128.6, 129.76, 129.85, 130.1, 130.5, 131.9, 133.3, 135.0, 137.4, 147.0, 148.6, 148.9, 196.9. MS: m/z 310 [M+H]<sup>+</sup>.

**(4-Methoxyphenyl)(4-phenylquinolin-3-yl)methanone (5b)**<sup>6</sup>

Eluent: petroleum ether/ethyl acetate (5:1). Yellow solid (159.4 mg, 94%), mp 118-120 °C (lit.<sup>6</sup> 115-116 °C). <sup>1</sup>H NMR (600 MHz, CDCl<sub>3</sub>)  $\delta$  3.79 (s, 3H), 6.77 (d, *J* = 8.4 Hz, 2H), 7.27-7.31 (m, 5H), 7.53 (t, *J* = 7.8 Hz, 1H), 7.63 (d, *J* = 8.4 Hz, 2H), 7.78 (t, *J* = 7.8 Hz, 2H), 8.23 (d, *J* = 8.4 Hz, 1H), 8.96 (s, 1H). <sup>13</sup>C NMR (150 MHz, CDCl<sub>3</sub>)  $\delta$  55.5, 113.6, 126.6, 126.7, 127.5, 128.2, 128.5, 129.8, 130.0, 130.3, 132.2, 132.3, 135.1, 146.6, 148.5, 148.7, 163.8, 195.1. MS: m/z 340 [M+H]<sup>+</sup>.

**(4-Phenylquinolin-3-yl)(4-(trifluoromethyl)phenyl)methanone (5c)**

Eluent: petroleum ether/ethyl acetate (10:1). Yellow solid (147.1 mg, 78%), mp 139-141 °C. <sup>1</sup>H NMR (600 MHz, CDCl<sub>3</sub>)  $\delta$  7.24-7.29 (m, 5H), 7.50 (d, *J* = 8.4 Hz, 2H), 7.55 (t, *J* = 7.8 Hz, 1H), 7.66 (d, *J* = 8.4 Hz, 2H), 7.82 (t, *J* = 7.8 Hz, 2H), 8.25 (d, *J* = 8.4 Hz, 1H), 9.04 (s, 1H). <sup>13</sup>C NMR (150 MHz, CDCl<sub>3</sub>)  $\delta$  123.5 (q, <sup>1</sup>*J*<sub>C-F</sub> = 271.4 Hz), 125.2 (q, <sup>3</sup>*J*<sub>C-F</sub> = 3.3 Hz), 126.2, 126.8, 127.8, 128.4, 128.8, 129.7, 129.9, 130.2, 130.9, 131.1, 134.0 (q, <sup>2</sup>*J*<sub>C-F</sub> = 32.9 Hz), 134.7, 140.3, 147.4, 148.5, 149.2, 196.1. HRMS calcd for C<sub>23</sub>H<sub>14</sub>F<sub>3</sub>NNaO: 400.0920 [M+Na]<sup>+</sup>, found: 400.0949.

**(4-Phenylquinolin-3-yl)(thiophen-2-yl)methanone (5d)**<sup>6</sup>

Eluent: petroleum ether/ethyl acetate (5:1). Yellow solid (141.8 mg, 90%), mp 123-124 °C (lit.<sup>6</sup> 128-130 °C). <sup>1</sup>H NMR (400 MHz, CDCl<sub>3</sub>)  $\delta$  6.97 (dd, *J*<sub>1</sub> = 4.8 Hz, *J*<sub>2</sub> = 4.0 Hz, 1H), 7.28 (dd, *J*<sub>1</sub> = 4.0 Hz, *J*<sub>2</sub> = 1.2 Hz, 1H), 7.34-7.37 (m, 5H), 7.52-7.56 (m, 1H), 7.60 (dd, *J*<sub>1</sub> = 4.8 Hz, *J*<sub>2</sub> = 1.2 Hz, 1H), 7.78-7.82 (m, 2H), 8.23 (dd, *J*<sub>1</sub> = 8.0 Hz, *J*<sub>2</sub> = 0.8 Hz, 1H), 9.04 (s, 1H). <sup>13</sup>C NMR (150 MHz, CDCl<sub>3</sub>)  $\delta$  126.5, 126.9, 127.6, 128.1, 128.4, 128.7, 129.8, 130.1, 130.6, 131.9, 134.9, 135.4, 135.6, 144.5, 146.8, 148.1, 148.8, 188.3. MS: m/z 316 [M+H]<sup>+</sup>.

**1-(4-Phenylquinolin-3-yl)ethanone (5e)**<sup>7</sup>

Eluent: petroleum ether/ethyl acetate (5:1). Yellow solid (63.0 mg, 51%), mp 75-76 °C (lit.<sup>7</sup> 69-71 °C).

<sup>1</sup>H NMR (600 MHz, CDCl<sub>3</sub>) δ 1.97 (s, 3H), 7.38 (dd, *J*<sub>1</sub> = 6.6 Hz, *J*<sub>2</sub> = 3.0 Hz, 2H), 7.52 (t, *J* = 7.8 Hz, 1H), 7.55-7.57 (m, 3H), 7.70 (d, *J* = 7.8 Hz, 1H), 7.78 (t, *J* = 7.8 Hz, 1H), 8.18 (d, *J* = 8.4 Hz, 1H), 9.09 (s, 1H). <sup>13</sup>C NMR (150 MHz, CDCl<sub>3</sub>) δ 30.6, 126.3, 127.1, 127.5, 128.9, 129.2, 129.69, 129.72, 130.8, 132.2, 135.8, 146.8, 148.9, 149.0, 202.3. MS: *m/z* 248 [M+H]<sup>+</sup>.

#### **(6-Chloro-4-phenylquinolin-3-yl)(phenyl)methanone (5f)**<sup>6</sup>

Eluent: petroleum ether/ethyl acetate (10:1). White solid (154.4 mg, 90%), mp 175-177 °C (lit.<sup>6</sup> 181-

182 °C). <sup>1</sup>H NMR (600 MHz, CDCl<sub>3</sub>) δ 7.26-7.32 (m, 7H), 7.43 (t, *J* = 7.8 Hz, 1H), 7.60 (d, *J* = 7.2 Hz, 2H), 7.73 (dd, *J*<sub>1</sub> = 9.0 Hz, *J*<sub>2</sub> = 2.4 Hz, 1H), 7.75 (d, *J* = 2.4 Hz, 1H), 8.17 (d, *J* = 9.0 Hz, 1H), 8.98 (s, 1H). <sup>13</sup>C NMR (150 MHz, CDCl<sub>3</sub>) δ 125.5, 127.3, 128.3, 128.5, 128.9, 129.7, 130.0, 131.4, 131.5, 132.6, 133.4, 133.6, 134.3, 137.1, 146.1, 147.3, 148.7, 196.4. MS: *m/z* 344 [M+H]<sup>+</sup>.

#### **(4-Methylquinolin-3-yl)(phenyl)methanone (5g)**<sup>5</sup>

Eluent: petroleum ether/ethyl acetate (10:1). White solid (70.4 mg, 57%), mp 87-89 °C (lit.<sup>5</sup> 82-86 °C).

<sup>1</sup>H NMR (400 MHz, CDCl<sub>3</sub>) δ 2.67 (s, 3H), 7.49 (t, *J* = 7.6 Hz, 2H), 7.61-7.68 (m, 2H), 7.78-7.83 (m, 1H), 7.84-7.86 (m, 2H), 8.13 (dd, *J*<sub>1</sub> = 8.4 Hz, *J*<sub>2</sub> = 0.4 Hz, 1H), 8.17 (d, *J* = 8.4 Hz, 1H), 8.82 (s, 1H). <sup>13</sup>C NMR (100 MHz, CDCl<sub>3</sub>) δ 15.9, 124.5, 127.3, 127.6, 128.8, 130.1, 130.2, 130.4, 131.9, 133.9, 137.5, 143.6, 148.1, 148.6, 197.0. MS: *m/z* 248 [M+H]<sup>+</sup>.

#### **(4-Methylquinolin-3-yl)(*p*-tolyl)methanone (5h)**

Eluent: petroleum ether/ethyl acetate (10:1). Yellow solid (73.1 mg, 56%), mp 118-120 °C. <sup>1</sup>H NMR (600

MHz, CDCl<sub>3</sub>) δ 2.45 (s, 3H), 2.67 (s, 3H), 7.30 (d, *J* = 7.8 Hz, 2H), 7.67 (t, *J* = 7.8 Hz, 1H), 7.76 (d, *J* = 7.8 Hz, 2H), 7.81 (t, *J* = 7.8 Hz, 1H), 8.13 (d, *J* = 8.4 Hz, 1H), 8.18 (d, *J* = 8.4 Hz, 1H), 8.82 (s, 1H). <sup>13</sup>C NMR (150 MHz, CDCl<sub>3</sub>) δ 15.9, 21.8, 124.4, 127.3, 127.7, 129.6, 130.2, 130.31, 130.34, 132.2, 135.0, 143.3, 145.0, 148.0, 148.6, 196.6. HRMS calcd for C<sub>18</sub>H<sub>16</sub>NO: 262.1226 [M+H]<sup>+</sup>, found: 262.1248.

**(4-Methoxyphenyl)(4-methylquinolin-3-yl)methanone (5i)**

Eluent: petroleum ether/ethyl acetate (5:1). White solid (80.4 mg, 58%), mp 91-93 °C. <sup>1</sup>H NMR (600 MHz, CDCl<sub>3</sub>) δ 2.65 (s, 3H), 3.88 (s, 3H), 6.95 (d, *J* = 9.0 Hz, 2H), 7.64 (t, *J* = 7.2 Hz, 1H), 7.79 (t, *J* = 7.8 Hz, 1H), 7.82 (d, *J* = 9.0 Hz, 2H), 8.11 (d, *J* = 7.8 Hz, 1H), 8.16 (d, *J* = 8.4 Hz, 1H), 8.81 (s, 1H). <sup>13</sup>C NMR (150 MHz, CDCl<sub>3</sub>) δ 15.8, 55.6, 114.1, 124.4, 127.3, 127.7, 130.2, 130.5, 132.4, 132.6, 142.9, 147.9, 148.5, 164.3, 195.5. HRMS calcd for C<sub>18</sub>H<sub>16</sub>NO<sub>2</sub>: 278.1176 [M+H]<sup>+</sup>, found: 278.1202.

**(4-Chlorophenyl)(4-methylquinolin-3-yl)methanone (5j)**

Eluent: petroleum ether/ethyl acetate (10:1). White solid (73.1 mg, 52%), mp 150-152 °C. <sup>1</sup>H NMR (600 MHz, CDCl<sub>3</sub>) δ 2.69 (s, 3H), 7.49 (d, *J* = 8.4 Hz, 2H), 7.69 (t, *J* = 7.8 Hz, 1H), 7.81 (d, *J* = 8.4 Hz, 1H), 7.83 (t, *J* = 7.8 Hz, 2H), 8.15 (d, *J* = 8.4 Hz, 1H), 8.19 (d, *J* = 8.4 Hz, 1H), 8.81 (s, 1H). <sup>13</sup>C NMR (150 MHz, CDCl<sub>3</sub>) δ 15.9, 124.5, 127.5, 127.6, 129.2, 130.3, 130.6, 131.4, 131.5, 135.9, 140.5, 143.8, 148.2, 148.4, 195.7. HRMS calcd for C<sub>17</sub>H<sub>13</sub>ClNO: 282.0680 [M+H]<sup>+</sup>, found: 282.0695.

**(4-Methylquinolin-3-yl)(4-(trifluoromethyl)phenyl)methanone (5k)**

Eluent: petroleum ether/ethyl acetate (10:1). White solid (77.2 mg, 49%), mp 140-142 °C. <sup>1</sup>H NMR (600 MHz, CDCl<sub>3</sub>) δ 2.69 (s, 3H), 7.69 (t, *J* = 7.2 Hz, 1H), 7.77 (d, *J* = 8.4 Hz, 2H), 7.82-7.85 (m, 1H), 7.96 (d, *J* = 7.8 Hz, 2H), 8.15 (d, *J* = 8.4 Hz, 1H), 8.18 (d, *J* = 8.4 Hz, 1H), 8.81 (s, 1H). <sup>13</sup>C NMR (150 MHz, CDCl<sub>3</sub>) δ 16.0, 123.5 (q, <sup>1</sup>*J*<sub>C-F</sub> = 271.2 Hz), 124.5, 125.9 (q, <sup>3</sup>*J*<sub>C-F</sub> = 4.4 Hz), 127.56, 127.60, 130.3, 130.4, 130.8, 131.0, 135.0 (q, <sup>2</sup>*J*<sub>C-F</sub> = 31.8 Hz), 140.3, 144.3, 148.3, 148.5, 195.9. HRMS calcd for C<sub>18</sub>H<sub>13</sub>F<sub>3</sub>NO: 316.0944 [M+H]<sup>+</sup>, found: 316.0968.

**1-Benzoyl-7H-naphtho[1,2,3-de]quinolin-7-one (5l)**

Eluent: petroleum ether/ethyl acetate (5:1). Orange solid (77.3 mg, 46%), mp 188-189 °C. <sup>1</sup>H NMR (600 MHz, CDCl<sub>3</sub>) δ 7.41-7.45 (m, 3H), 7.53 (t, *J* = 7.8 Hz, 1H), 7.60 (t, *J* = 7.8 Hz, 1H), 7.85 (d, *J* = 8.4 Hz, 1H), 7.89 (d, *J* = 7.8 Hz, 2H), 8.02 (t, *J* = 7.8 Hz, 1H), 8.46 (d, *J* = 7.8 Hz, 1H), 8.49 (d, *J* = 8.4 Hz, 1H),

8.76 (d,  $J = 7.2$  Hz, 1H), 8.93 (s, 1H).  $^{13}\text{C}$  NMR (150 MHz,  $\text{CDCl}_3$ )  $\delta$  123.1, 128.7, 128.8, 129.0, 129.1, 130.1, 130.4, 130.5, 130.8, 131.3, 132.8, 132.9, 133.2, 133.5, 134.6, 136.1, 136.5, 147.6, 150.0, 182.1, 197.9. HRMS calcd for  $\text{C}_{23}\text{H}_{13}\text{NNaO}_2$ : 358.0838  $[\text{M}+\text{Na}]^+$ , found: 358.0864.

### 3. Control experiments (I)

**3.1.** To a 15 mL reaction tube equipped with a stir bar were added **4a** (98.5 mg, 0.5 mmol), toluene (3.0 mL),  $\text{Cu}(\text{OAc})_2$  (9.1 mg, 0.05 mmol), 2,2'-bipyridine (15.6 mg, 0.1 mmol), TEMPO (156.2 mg, 1 mmol) and **2a** (80  $\mu\text{L}$ , 0.6 mmol) with stirring. After being flushed with  $\text{N}_2$ , the tube was sealed, and the mixture was stirred at 120  $^\circ\text{C}$  for 16 h. Afterwards, the resulting mixture was diluted with DCM (20 mL), and washed with water (10 mL) and brine (10 mL). The organic layer was dried over anhydrous  $\text{Na}_2\text{SO}_4$ , and evaporated under reduced pressure. The residue was purified by column chromatography on silica gel with petroleum ether/ethyl acetate (10:1) as the eluent to give 1-phenylprop-2-en-1-one (**C**, 7.2 mg, 9%), 3-((2-benzoyl phenyl)amino)-1-phenylpropan-1-one (**D**, 98.7 mg, 60%), and **5a** (23.2 mg, 15%).

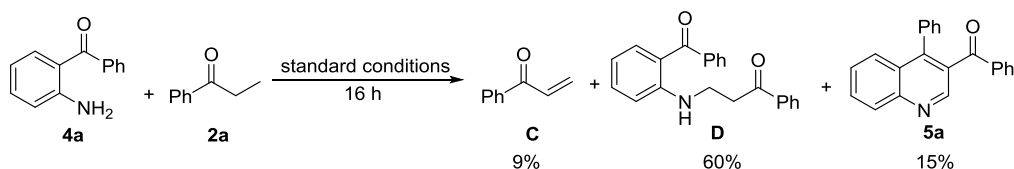

#### 1-Phenylprop-2-en-1-one (**C**)<sup>8</sup>

Eluent: petroleum ether/ethyl acetate (50:1). Colorless liquid.  $^1\text{H}$  NMR (400 MHz,  $\text{CDCl}_3$ )  $\delta$  5.93 (dd,  $J_1 = 10.8$  Hz,  $J_2 = 1.6$  Hz, 1H), 6.44 (dd,  $J_1 = 16.8$  Hz,  $J_2 = 1.6$  Hz, 1H), 7.16 (dd,  $J_1 = 16.8$  Hz,  $J_2 = 10.4$  Hz, 1H), 7.48 (td,  $J_1 = 6.4$  Hz,  $J_2 = 1.2$  Hz, 2H), 7.58 (tt,  $J_1 = 8.4$  Hz,  $J_2 = 1.2$  Hz, 1H), 7.94-7.97 (m, 2H).  $^{13}\text{C}$  NMR (100 MHz,  $\text{CDCl}_3$ )  $\delta$  128.6, 128.7, 130.2, 132.4, 133.0, 137.3, 191.1. MS:  $m/z$  133  $[\text{M}+\text{H}]^+$ .

#### 3-((2-Benzoylphenyl)amino)-1-phenylpropan-1-one (**D**)

Eluent: petroleum ether/ethyl acetate (10:1). Yellow solid, mp 88-89  $^\circ\text{C}$ .  $^1\text{H}$  NMR (400 MHz,  $\text{CDCl}_3$ )  $\delta$  3.38 (t,  $J = 7.2$  Hz, 2H), 3.75 (q,  $J = 6.8$  Hz, 2H), 6.54 (t,  $J = 8.0$  Hz, 1H), 6.86 (d,  $J = 8.8$  Hz, 1H), 7.37-7.51 (m, 7H), 7.53-7.59 (m, 3H), 7.97 (d,  $J = 7.6$  Hz, 2H), 8.73 (br s, 1H).  $^{13}\text{C}$  NMR (100 MHz,

CDCl<sub>3</sub>)  $\delta$  37.8, 38.1, 111.4, 114.0, 117.5, 128.1, 128.7, 129.1, 130.8, 133.4, 135.1, 135.7, 136.7, 140.5, 151.5, 198.2, 199.3. HRMS calcd for C<sub>22</sub>H<sub>19</sub>NNaO<sub>2</sub>: 352.1308 [M+Na]<sup>+</sup>, found: 352.1326.

**3.2.** To a 15 mL reaction tube equipped with a stir bar were added **4a** (98.5 mg, 0.5 mmol), toluene (3.0 mL), Cu(OAc)<sub>2</sub> (9.1 mg, 0.05 mmol), 2,2'-bipyridine (15.6 mg, 0.1 mmol), TEMPO (78.1 mg, 0.5 mmol) and **C** (79.2 mg, 0.6 mmol) with stirring. After being flushed with N<sub>2</sub>, the tube was sealed, and the mixture was stirred at 120 °C for 24 h. Afterwards, the resulting mixture was diluted with DCM (20 mL), and washed with water (10 mL) and brine (10 mL). The organic layer was dried over anhydrous Na<sub>2</sub>SO<sub>4</sub>, and evaporated under reduced pressure. The residue was purified by column chromatography on silica gel with petroleum ether/ethyl acetate (10:1) as the eluent to give **5a** (142.2 mg, 92%).

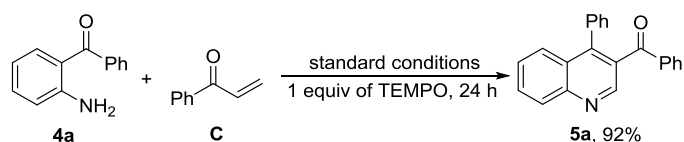

**3.3.** To a 15 mL reaction tube equipped with a stir bar were added **4a** (98.5 mg, 0.5 mmol), toluene (3.0 mL), Cu(OAc)<sub>2</sub> (9.1 mg, 0.05 mmol), 2,2'-bipyridine (15.6 mg, 0.1 mmol) and **C** (79.2 mg, 0.6 mmol) with stirring. After being flushed with N<sub>2</sub>, the tube was sealed, and the mixture was stirred at 120 °C for 36 h. Afterwards, the resulting mixture was diluted with DCM (20 mL), and washed with water (10 mL) and brine (10 mL). The organic layer was dried over anhydrous Na<sub>2</sub>SO<sub>4</sub>, and evaporated under reduced pressure. The residue was purified by column chromatography on silica gel with petroleum ether/ethyl acetate (10:1) as the eluent to give **D** (154.7 mg, 94%).

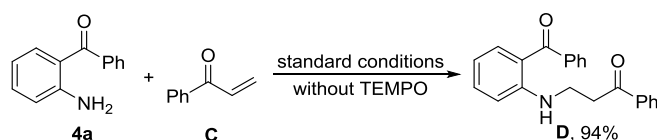

**3.4.** To a 15 mL reaction tube equipped with a stir bar were added **D** (164.6 mg, 0.5 mmol), toluene (3 mL), Cu(OAc)<sub>2</sub> (9.1 mg, 0.05 mmol), 2,2'-bipyridine (15.6 mg, 0.1 mmol) and TEMPO (78.1 mg, 0.5 mmol) with stirring. After being flushed with N<sub>2</sub>, the tube was sealed, and the mixture was stirred at

120 °C for 24 h. Afterwards, the resulting mixture was diluted with DCM (20 mL), and washed with water (10 mL) and brine (10 mL). The organic layer was dried over anhydrous Na<sub>2</sub>SO<sub>4</sub>, and concentrated. The residue was purified by column chromatography on silica gel with petroleum ether/ethyl acetate (10:1) as the eluent to give **5a** (142.2 mg, 92%).

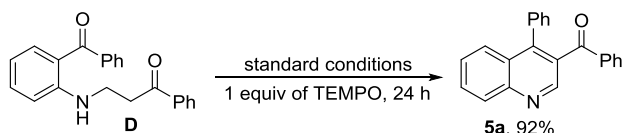

**3.5.** To a 15 mL reaction tube equipped with a stir bar were added **D** (164.6 mg, 0.5 mmol), toluene (3.0 mL), Cu(OAc)<sub>2</sub> (9.1 mg, 0.05 mmol) and 2,2'-bipyridine (15.6 mg, 0.1 mmol) with stirring. After being flushed with N<sub>2</sub>, the tube was sealed, and the mixture was stirred at 120 °C for 36 h. From the resulting mixture, 95% of **D** were recovered.

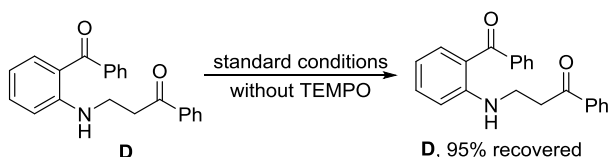

#### 4. Control experiments (II)

**4.1.** To a 50 mL reaction tube equipped with a stir bar were added 1-phenylprop-2-yn-1-one (**6**, 130.0 mg, 1 mmol), DCM (10 mL), **4a** (394.2 mg, 2 mmol) and FeCl<sub>3</sub>·6H<sub>2</sub>O (13.5 mg, 0.05 mol). The mixture was then stirred at 30 °C for 5 h. The resulting mixture was concentrated under reduced pressure, and the residue was purified by column chromatography on silica gel with petroleum ether/ethyl acetate (10:1) as the eluent to afford 3-((2-benzoylphenyl)amino)-1-phenylprop-2-en-1-one (**G**, 229.0 mg, 70%).<sup>3</sup>

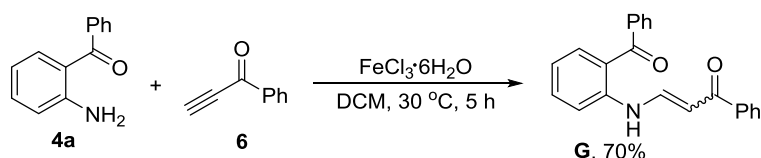

#### 3-((2-Benzoylphenyl)amino)-1-phenylprop-2-en-1-one (**G**)

Eluent: petroleum ether/ethyl acetate (10:1). Yellow solid, mp 104-105 °C. <sup>1</sup>H NMR (600 MHz, CDCl<sub>3</sub>) δ 6.14 (d, *J* = 8.4 Hz, 1H), 7.02 (t, *J* = 7.8 Hz, 1H), 7.38-7.48 (m, 6H), 7.50-7.57 (m, 4H), 7.79 (d, *J* = 7.8

Hz, 2H), 8.02 (d,  $J = 7.8$  Hz, 2H), 13.38 (d,  $J = 12.0$  Hz, 1H).  $^{13}\text{C}$  NMR (150 MHz,  $\text{CDCl}_3$ )  $\delta$  96.4, 115.1, 121.2, 124.0, 127.8, 128.1, 128.3, 130.3, 131.6, 132.3, 133.7, 133.8, 138.6, 139.1, 142.4, 190.4, 197.1. HRMS calcd for  $\text{C}_{22}\text{H}_{17}\text{NNaO}_2$ : 350.1151  $[\text{M}+\text{Na}]^+$ , found: 350.1162.

**4.2.** To a 15 mL reaction tube equipped with a stir bar were added **G** (163.6 mg, 0.5 mmol), toluene (3.0 mL),  $\text{Cu}(\text{OAc})_2$  (9.1 mg, 0.05 mmol) and 2,2'-bipyridine (15.6 mg, 0.1 mmol) with stirring. After being flushed with  $\text{N}_2$ , the tube was sealed, and the mixture was stirred at 120 °C for 10 min. Afterwards, the resulting mixture was diluted with DCM (20 mL), and washed with water (10 mL) and brine (10 mL). The organic layer was dried over anhydrous  $\text{Na}_2\text{SO}_4$ , and evaporated under reduced pressure. The residue was purified by column chromatography on silica gel with petroleum ether/ethyl acetate (10:1) as the eluent to give **5a** (143.7 mg, 93%).

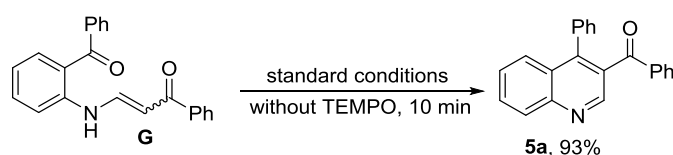

## 5. Gram scale synthesis of **5a**

To a 100 mL reaction tube equipped with a stir bar were added **4a** (985.4 mg, 5 mmol), toluene (20 mL),  $\text{Cu}(\text{OAc})_2$  (90.8 mg, 0.5 mmol), 2,2'-bipyridine (156.1 mg, 1 mmol), TEMPO (1.56 g, 10 mmol) and **2a** (0.80 mL, 6 mmol) with stirring. After being flushed with  $\text{N}_2$ , the tube was sealed, and the mixture was stirred at 120 °C for 40 h. Upon completion, the resulting mixture was diluted with DCM (50 mL), and washed with water (20 mL) and brine (20 mL). The organic layer was dried over anhydrous  $\text{Na}_2\text{SO}_4$  and concentrated under reduced pressure. The residue was purified by column chromatography on silica gel with petroleum ether/ethyl acetate (10:1) as the eluent to give **5a** (1.313 g, 85%).

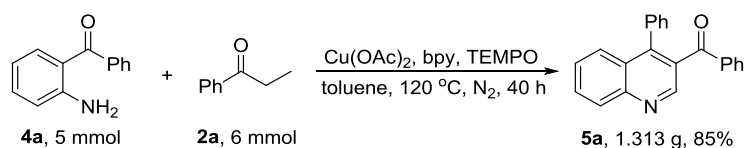

## 6. The formation of **5g'** along with the formation of **5g**

The fact that **5g-5k** were obtained only in moderate yields (see Table 3 of the main text) is mainly due to the formation of TEMPO-related side products. Taking **5g** as an example, under the standard reaction conditions, the formation of **5g** is along with the formation of phenyl(4-(((2,2,6,6-tetramethylpiperidin-1-yl)oxy)methyl)quinolin-3-yl)methanone (**5g'**) in a yield of 25%.

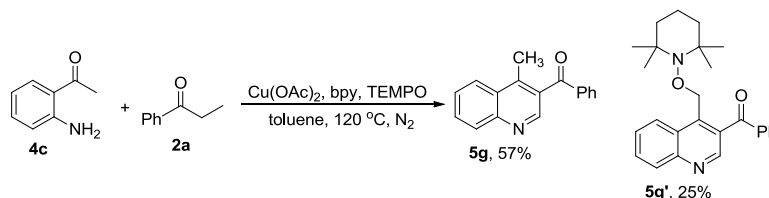

To a 15 mL reaction tube equipped with a stir bar were added 1-(2-aminophenyl)ethan-1-one (**4c**, 67.5 mg, 0.5 mmol), toluene (3.0 mL), Cu(OAc)<sub>2</sub> (9.1 mg, 0.05 mmol), 2,2'-bipyridine (15.6 mg, 0.1 mmol), TEMPO (156.1 mg, 1 mmol) and propiophenone (**2a**, 80  $\mu$ L, 0.6 mmol) with stirring. After being flushed with N<sub>2</sub>, the tube was sealed, and the mixture was stirred at 120 °C for 36 h. Upon completion, the resulting mixture was diluted with DCM (20 mL), and washed with water (10 mL) and brine (10 mL). The organic layer was dried over anhydrous Na<sub>2</sub>SO<sub>4</sub>, and evaporated under reduced pressure. The residue was purified by column chromatography on silica gel with petroleum ether/ethyl acetate (10:1) as the eluent to give **5g** (70.4 mg, 57%) and **5g'** (50.2 mg, 25%).

**Phenyl(4-(((2,2,6,6-tetramethylpiperidin-1-yl)oxy)methyl)quinolin-3-yl)methanone (**5g'**):** Eluent: petroleum ether/ethyl acetate (10:1). Yellow solid, mp 112-114 °C. <sup>1</sup>H NMR (600 MHz, CDCl<sub>3</sub>)  $\delta$ : 0.75 (s, 6H), 1.02 (s, 6H), 1.23-1.45 (m, 6H), 5.43 (s, 2H), 7.47 (t,  $J = 7.8$  Hz, 2H), 7.59 (t,  $J = 7.2$  Hz, 1H), 7.63-7.66 (m, 1H), 7.78-7.81 (m, 1H), 7.88 (t,  $J = 7.2$  Hz, 2H), 8.18 (t,  $J = 7.8$  Hz, 2H), 8.83 (s, 1H); <sup>13</sup>C NMR (100 MHz, CDCl<sub>3</sub>)  $\delta$  17.0, 20.3, 32.7, 39.7, 60.0, 124.7, 125.5, 127.4, 128.5, 130.21, 130.24, 130.3, 131.4, 133.6, 137.3, 142.3, 148.2, 148.6, 195.8. MS:  $m/z$  403 [M+H]<sup>+</sup>.



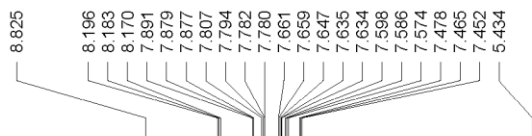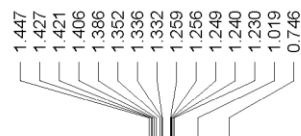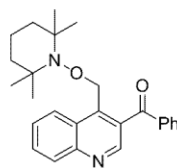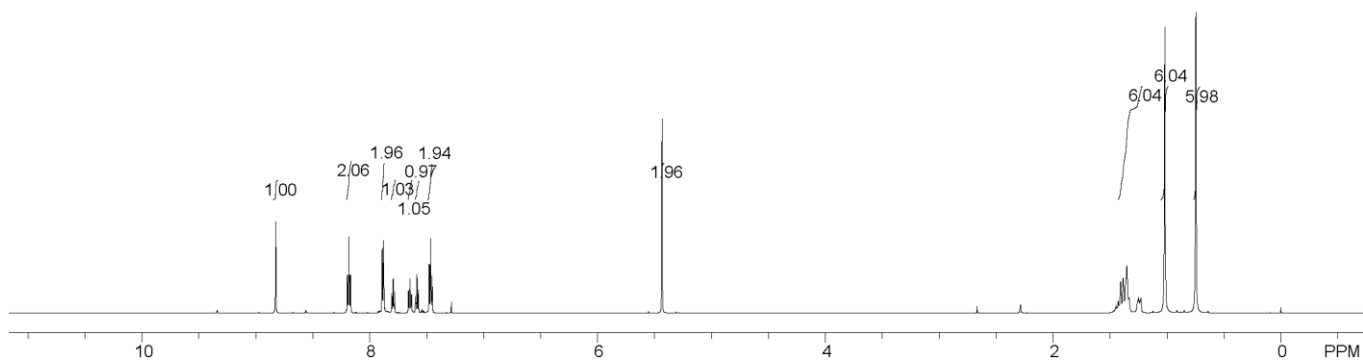

195.813

148.564  
148.237  
142.258  
137.320  
133.559  
131.399  
130.272  
130.243  
130.214  
128.548  
127.406  
125.537  
124.715

77.357  
77.241  
77.037  
76.717  
73.524

60.003

39.659  
32.705

20.340  
16.951

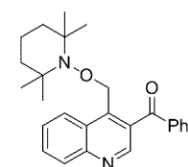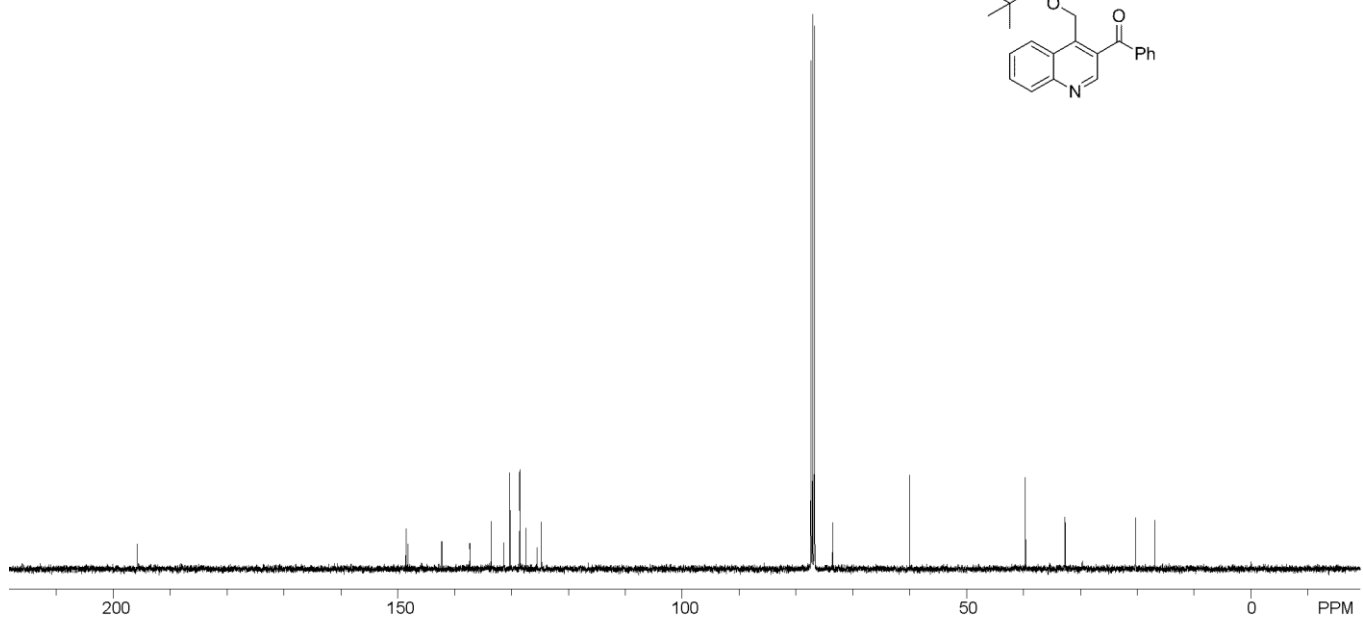

### III. References

- (1) S. Khong and O. Kwon, *J. Org. Chem.*, 2012, **77**, 8257.
- (2) P.-K. Mahata, C. Venkatesh, U.-K.-S. Kumar, H. Ila and H. Junjappa, *J. Org. Chem.*, 2003, **68**, 3966.
- (3) H. Li, X. Xu, J. Yang, X. Xie, H. Huang and Y. Li, *Tetrahedron Lett.*, 2011, **52**, 530.
- (4) E. Cini, E. Petricci, G.-I. Truglio, M. Vecchio and M. Taddei, *RSC Adv.*, 2016, **6**, 31386.
- (5) N. Anand, T. Chanda, S. Koley, S. Chowdhury and M.-S. Singh, *RSC Adv.*, 2015, **5**, 7654.
- (6) L. Luo, Z. Zhou, J. Zhu, X. Lu and H. Wang, *Tetrahedron Lett.*, 2016, **57**, 4987.
- (7) W.-Y. Gao, K. Leng, L. Cash, M. Chrzanowski, C.-A. Stackhouse, Y. Sun and S. Ma, *Chem. Commun.*, 2015, **51**, 4827.
- (8) X. Jie, Y. Shang, X. Zhang and W. Su, *J. Am. Chem. Soc.*, 2016, **138**, 5623.

#### IV. Copies of $^1\text{H}$ and $^{13}\text{C}$ NMR spectra of 3a-3r

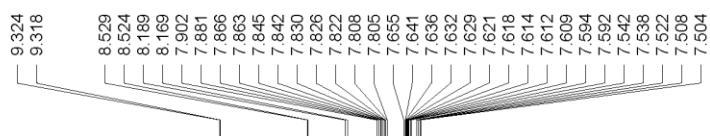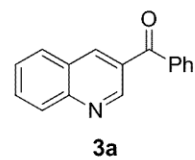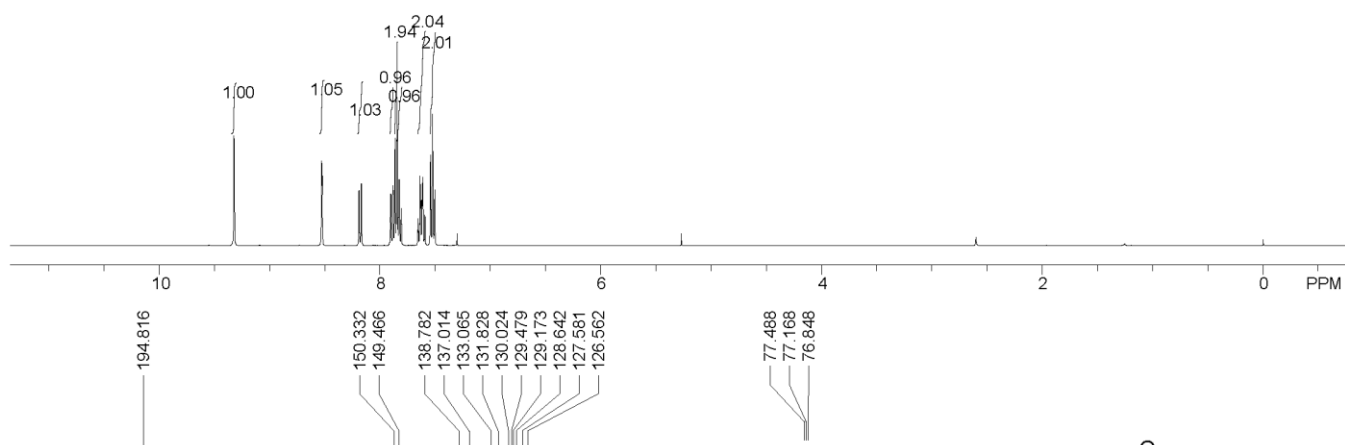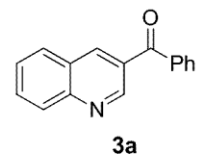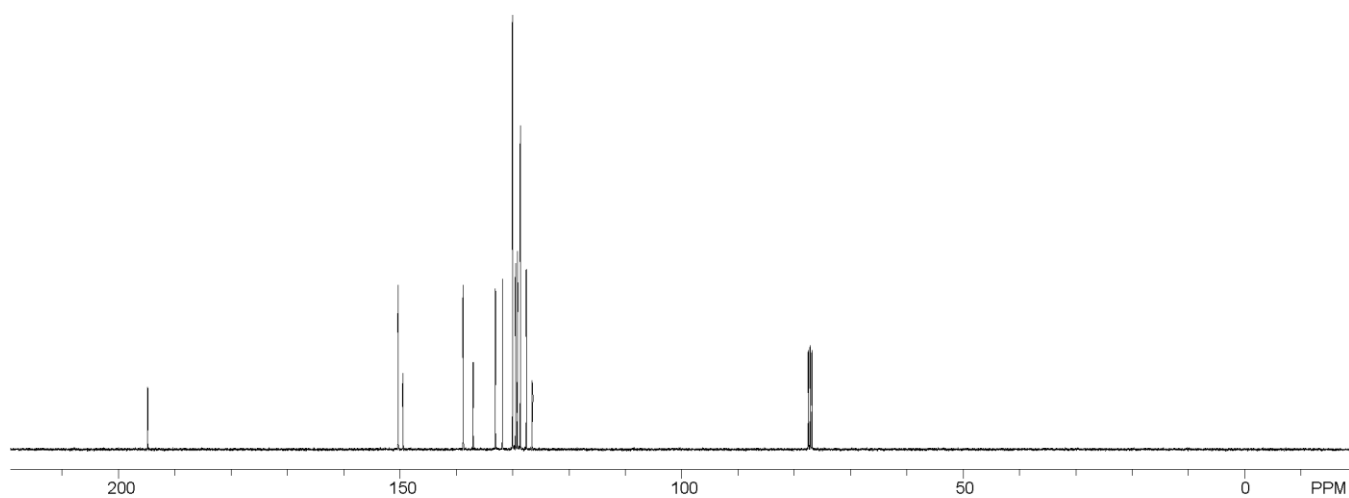

9.282  
9.257  
8.449  
8.445  
8.131  
8.109  
7.892  
7.886  
7.865  
7.846  
7.777  
7.771  
7.754  
7.749  
7.684  
7.665  
7.647  
7.564  
7.544  
7.525

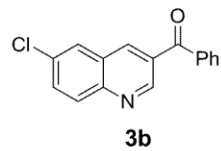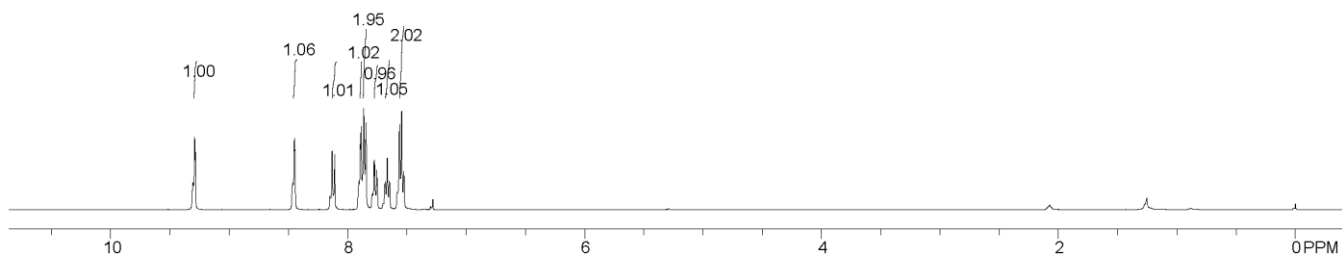

194.518  
150.521  
147.837  
137.632  
136.774  
133.465  
133.312  
132.657  
131.137  
130.854  
130.061  
128.744  
127.624  
127.297  
77.364  
77.052  
76.732

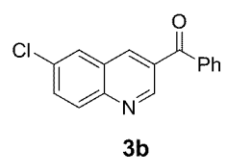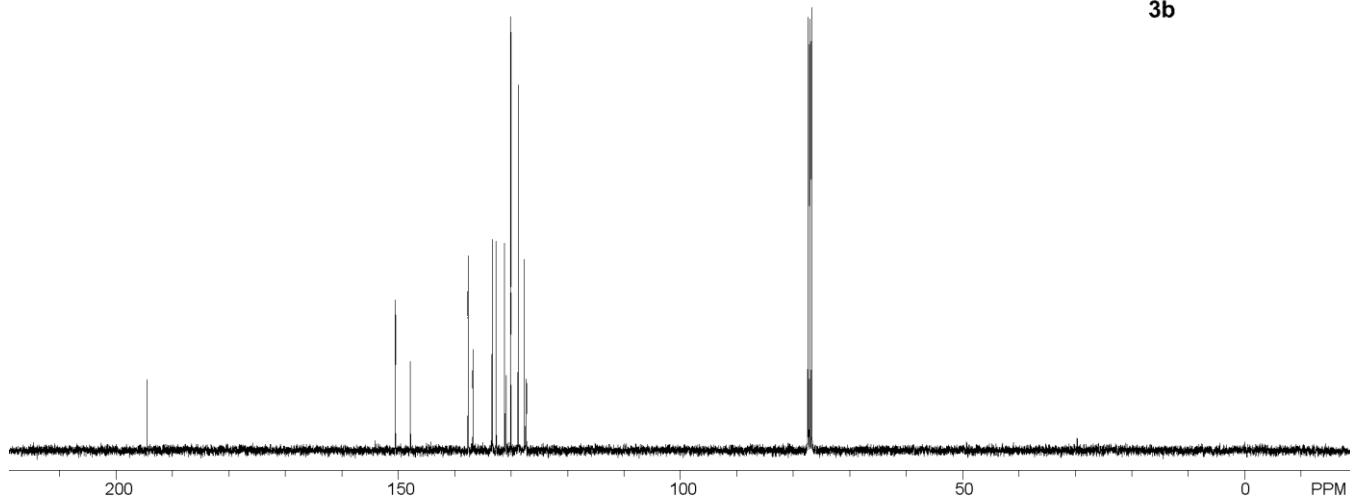

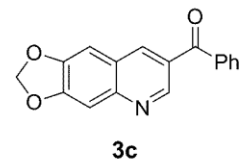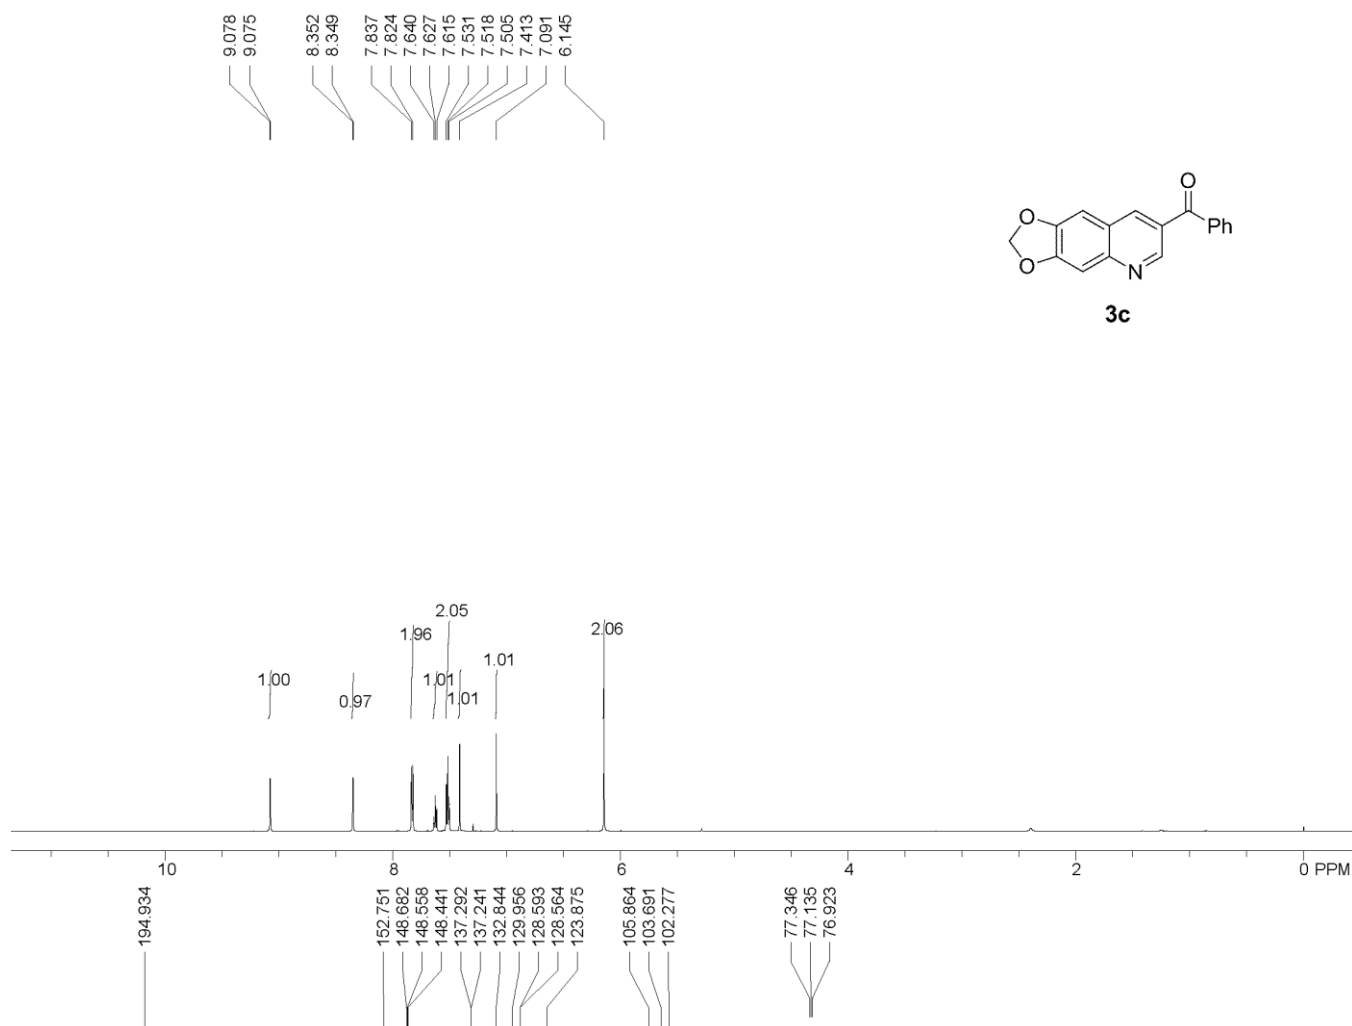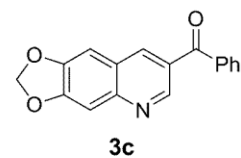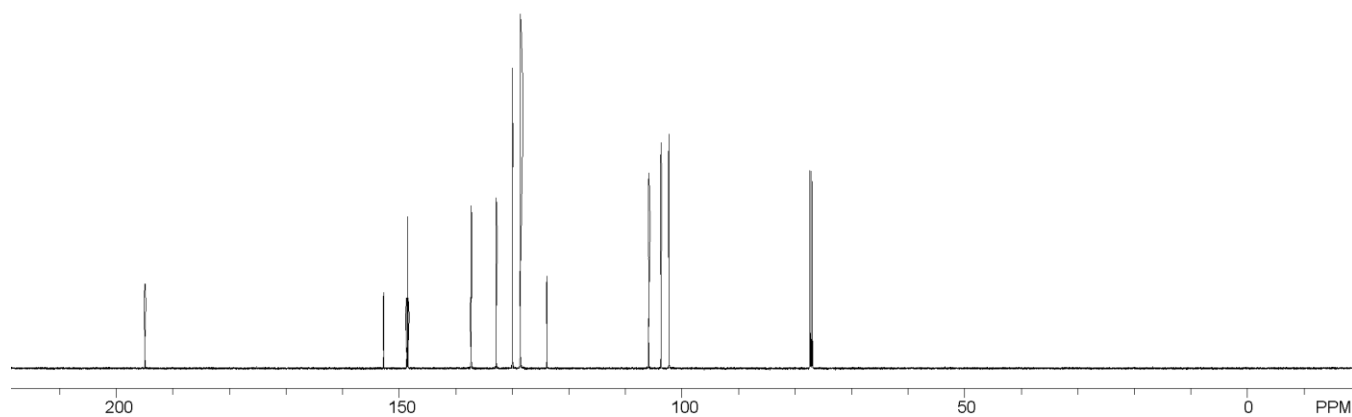

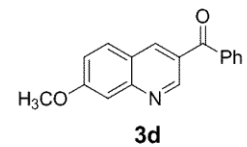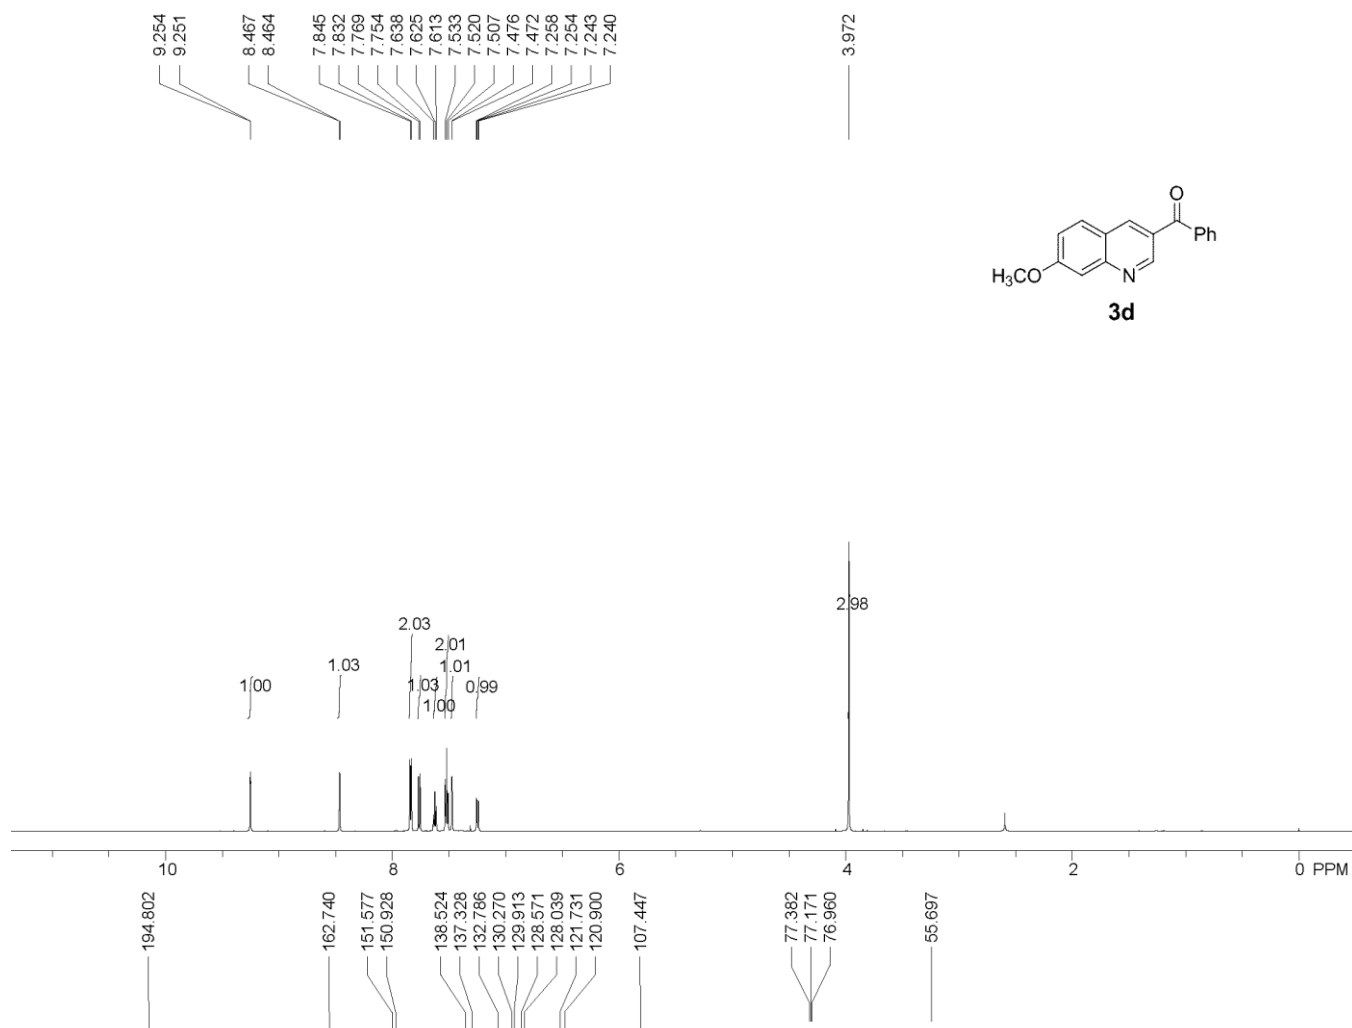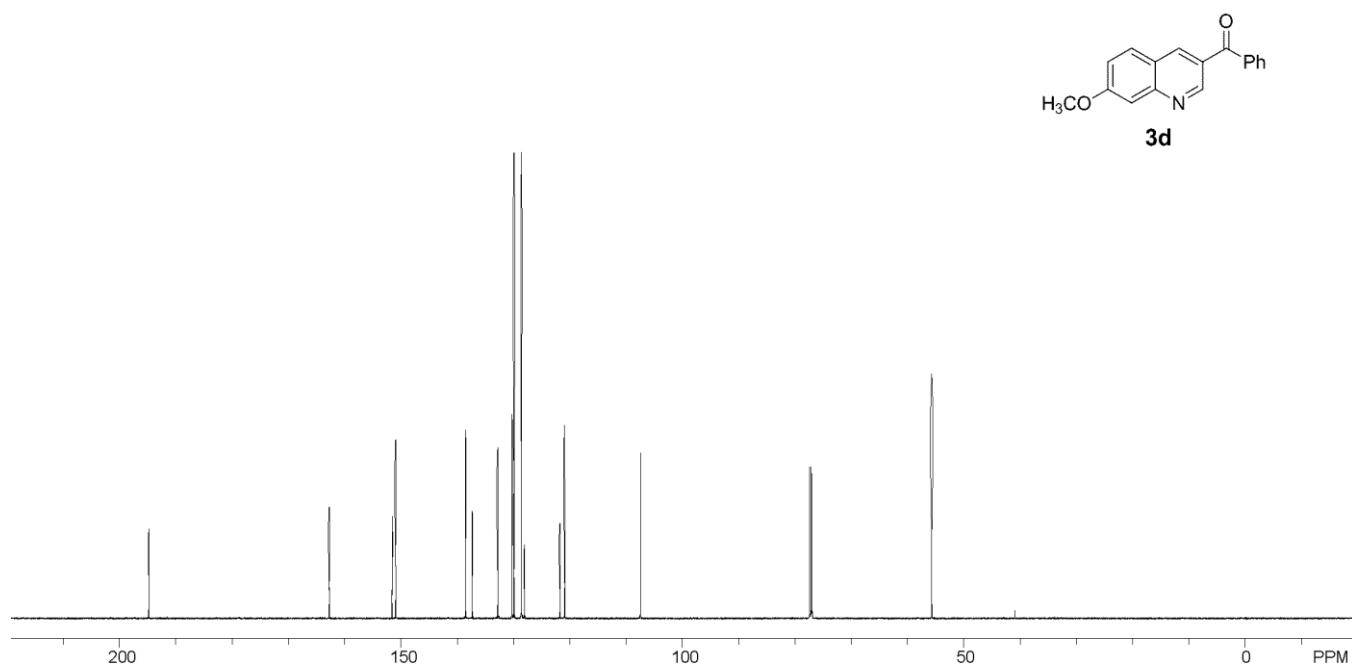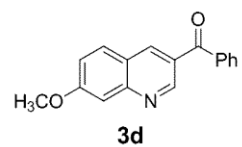

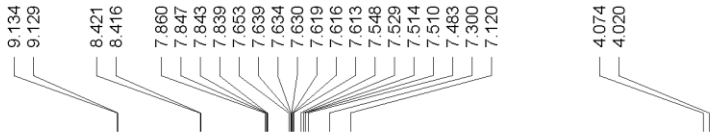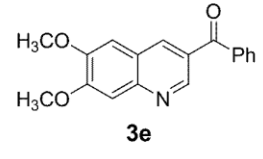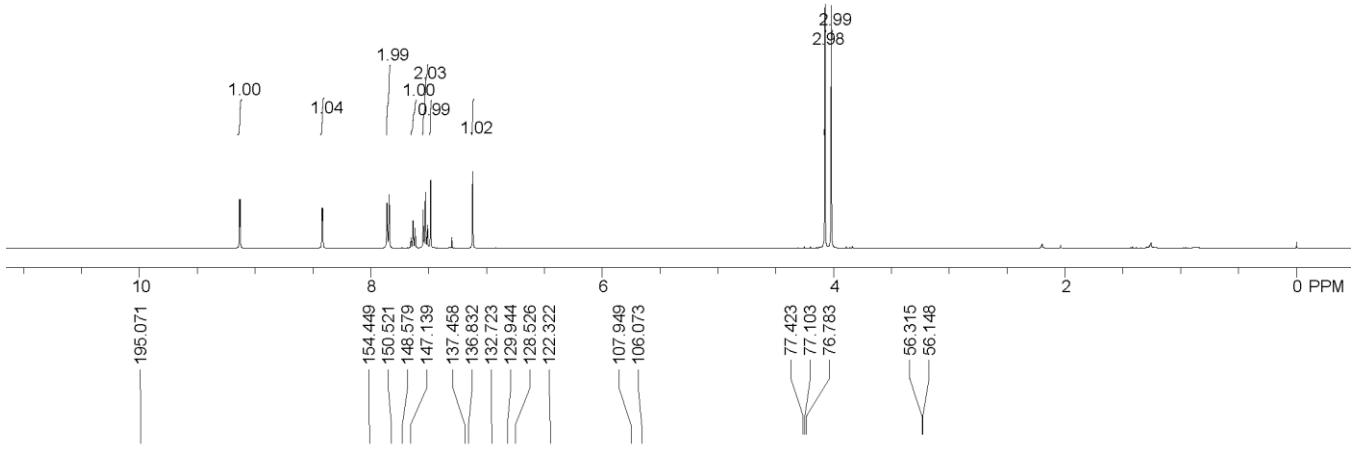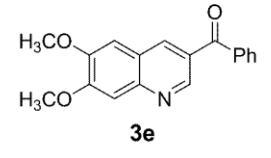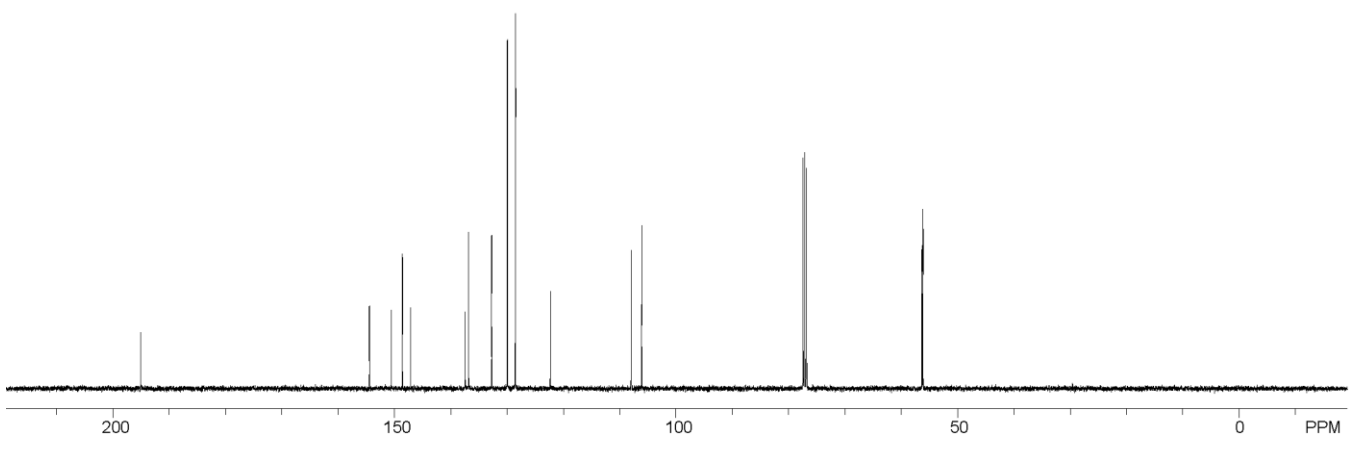

9.288  
9.285  
8.515  
8.512  
8.189  
8.174  
7.916  
7.903  
7.865  
7.851  
7.839  
7.735  
7.721  
7.677  
7.663  
7.650  
7.637  
7.625

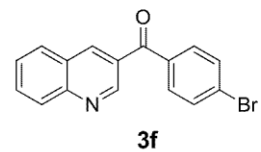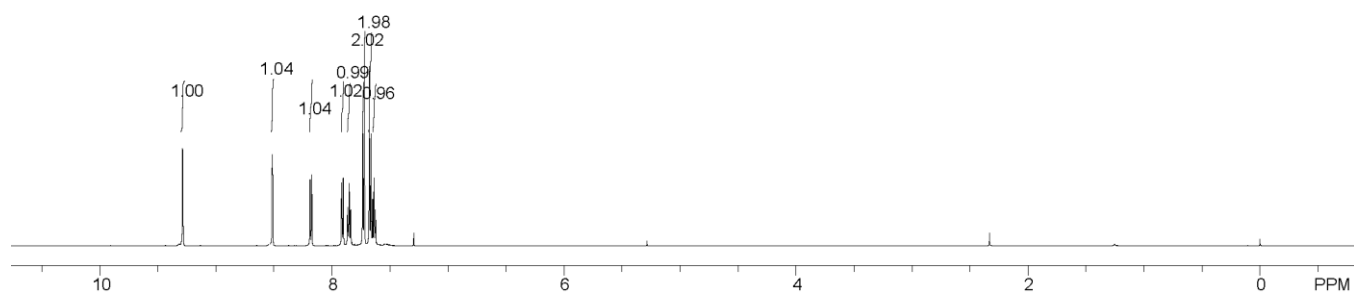

193.760  
150.096  
149.564  
138.736  
135.739  
132.042  
132.005  
131.495  
129.636  
129.548  
129.191  
128.287  
127.740  
126.522

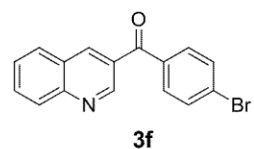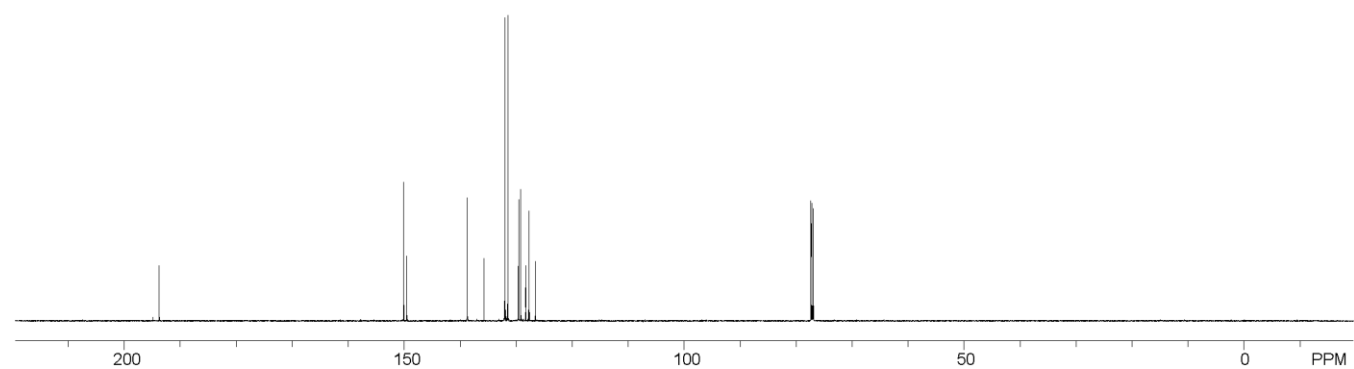



9.335  
9.330  
8.551  
8.546  
8.219  
8.197  
7.982  
7.962  
7.943  
7.922  
7.905  
7.902  
7.888  
7.885  
7.881  
7.867  
7.863  
7.832  
7.811  
7.811  
7.685  
7.683  
7.665  
7.647  
7.645  
7.275

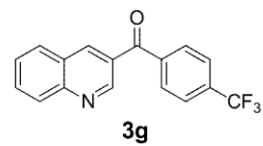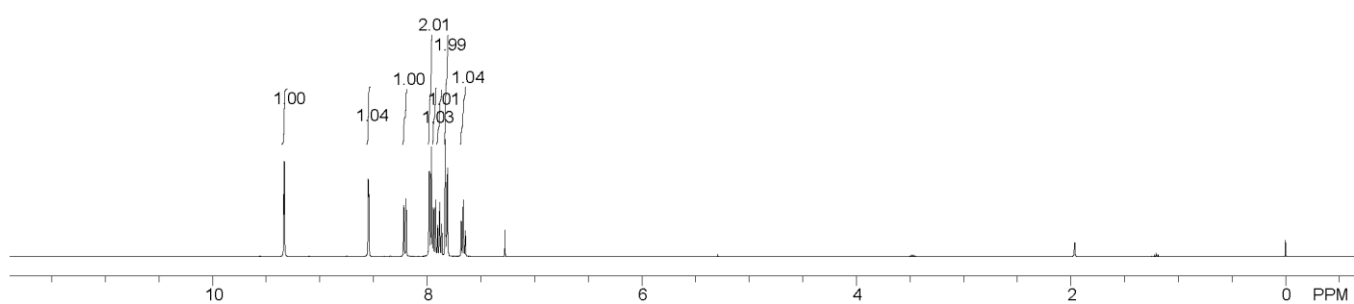

193.840  
150.053  
149.746  
140.077  
139.093  
134.681  
134.463  
134.244  
134.025  
132.304  
130.190  
129.614  
129.264  
129.234  
127.871  
126.515  
126.289  
125.785  
125.764  
125.734  
125.713  
124.480  
122.672  
120.863  
77.273  
77.062  
76.850

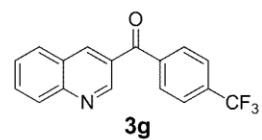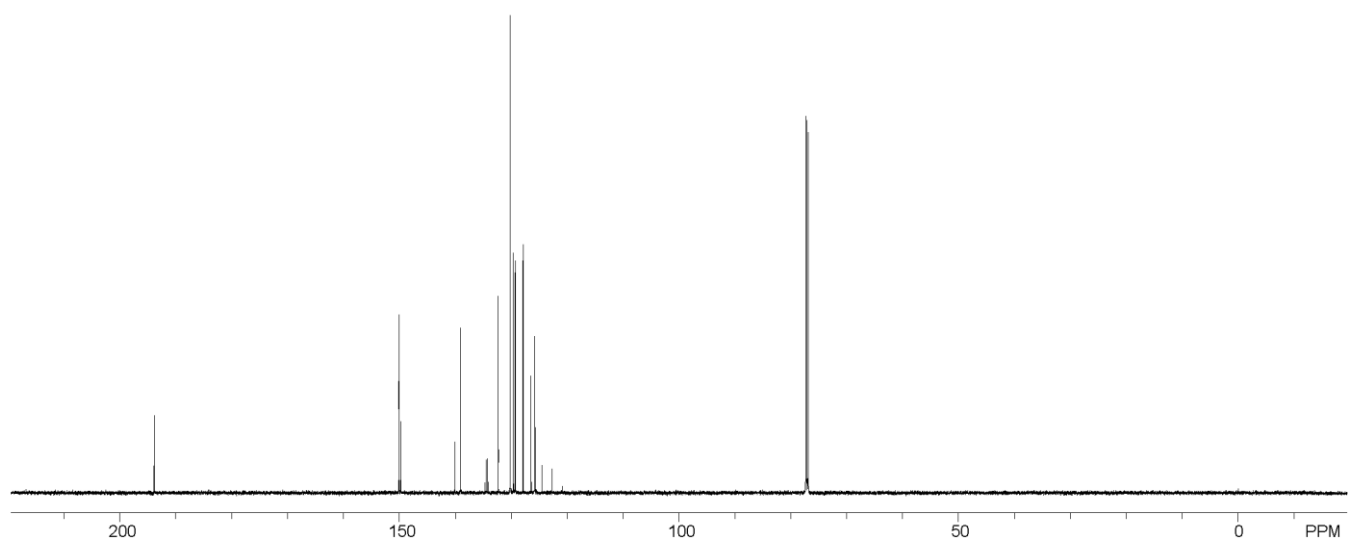

9.304  
9.299  
8.515  
8.510  
8.185  
8.164  
7.897  
7.877  
7.839  
7.835  
7.821  
7.817  
7.814  
7.800  
7.796  
7.777  
7.757  
7.625  
7.623  
7.606  
7.588  
7.586  
7.326  
7.306  
7.298

2.449

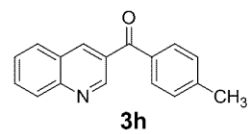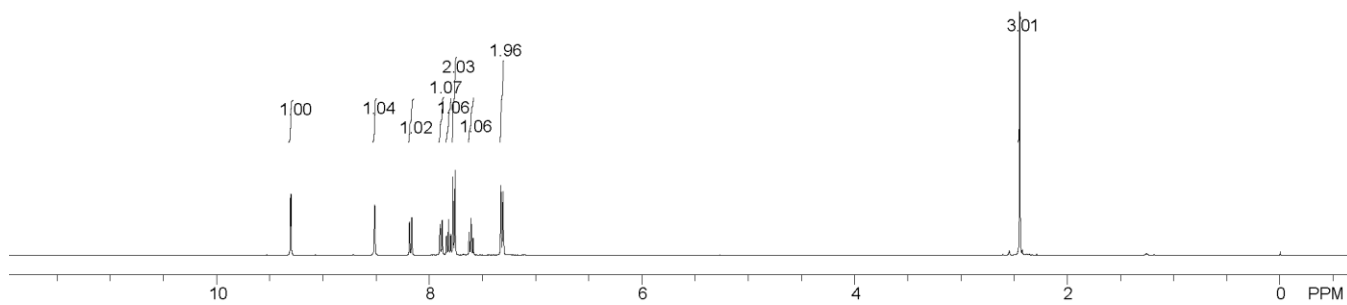

194.482

150.354  
149.379  
144.040  
138.542  
134.367  
131.688  
130.388  
130.257  
129.457  
129.341  
129.115  
127.522  
126.613

77.481  
77.161  
76.848

21.708

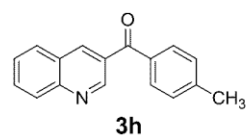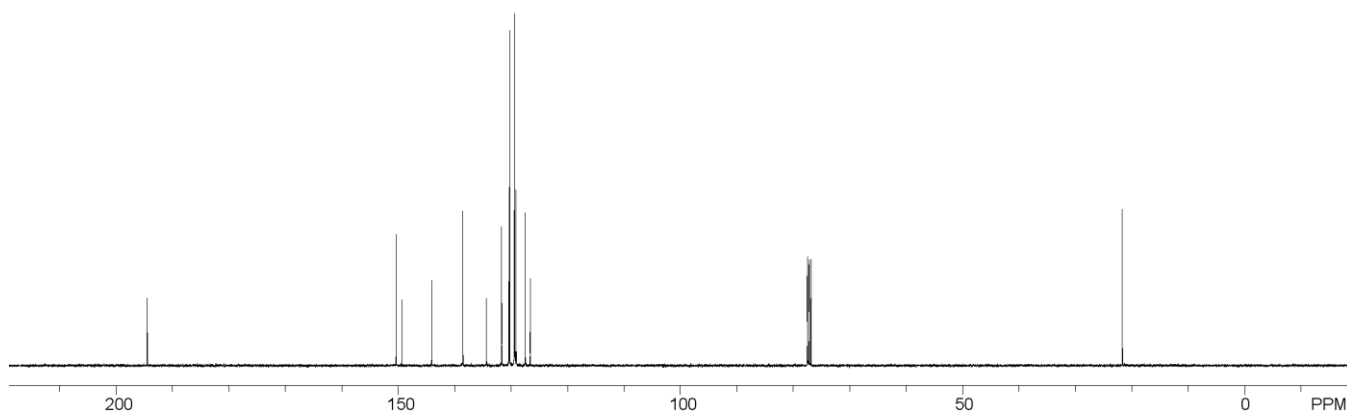

9.280  
9.274  
8.516  
8.511  
8.196  
8.175  
7.922  
7.901  
7.891  
7.886  
7.874  
7.869  
7.854  
7.851  
7.836  
7.833  
7.829  
7.815  
7.812  
7.646  
7.644  
7.626  
7.608  
7.606  
7.285  
7.026  
7.019  
7.014  
7.002  
6.997  
6.990  
3.903

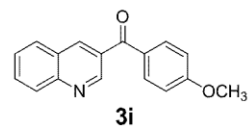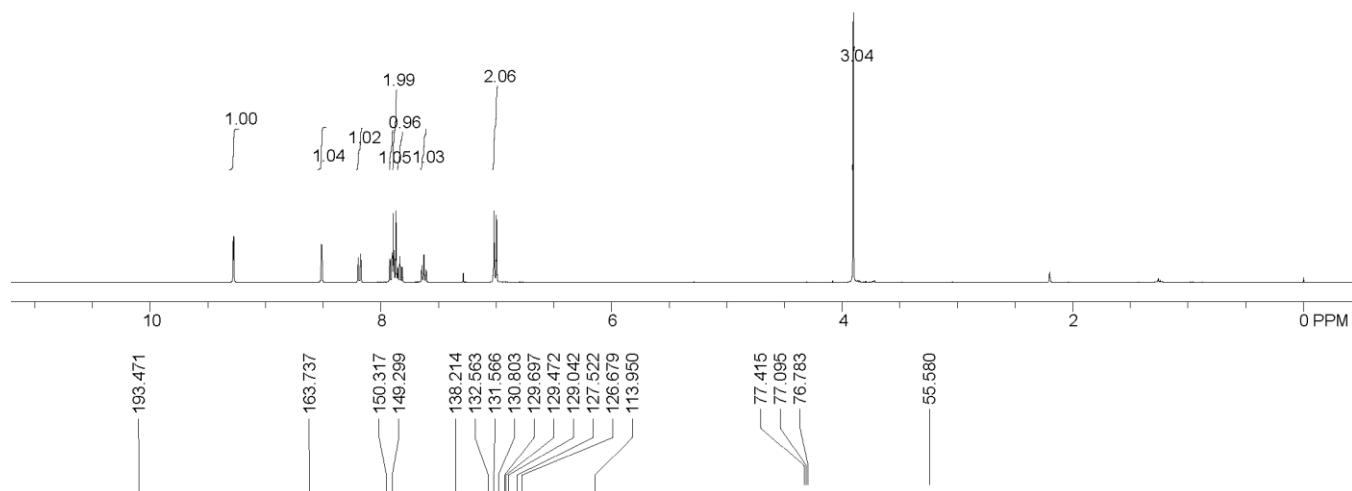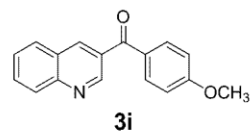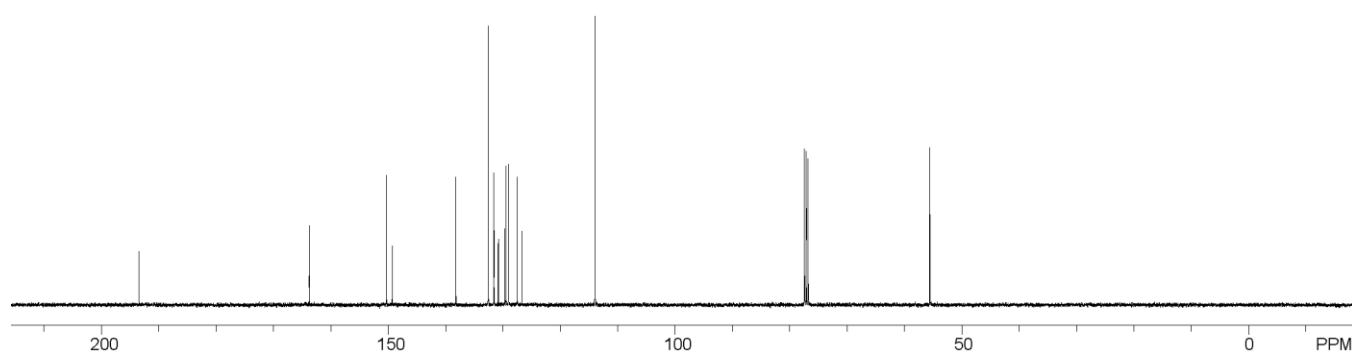

9.343  
9.337  
9.082  
9.077  
8.888  
8.884  
8.876  
8.872  
8.565  
8.560  
8.209  
8.206  
8.200  
8.185  
7.941  
7.921  
7.898  
7.894  
7.880  
7.877  
7.859  
7.856  
7.679  
7.660  
7.641  
7.540  
7.528  
7.520  
7.508

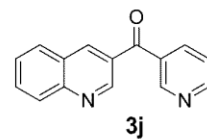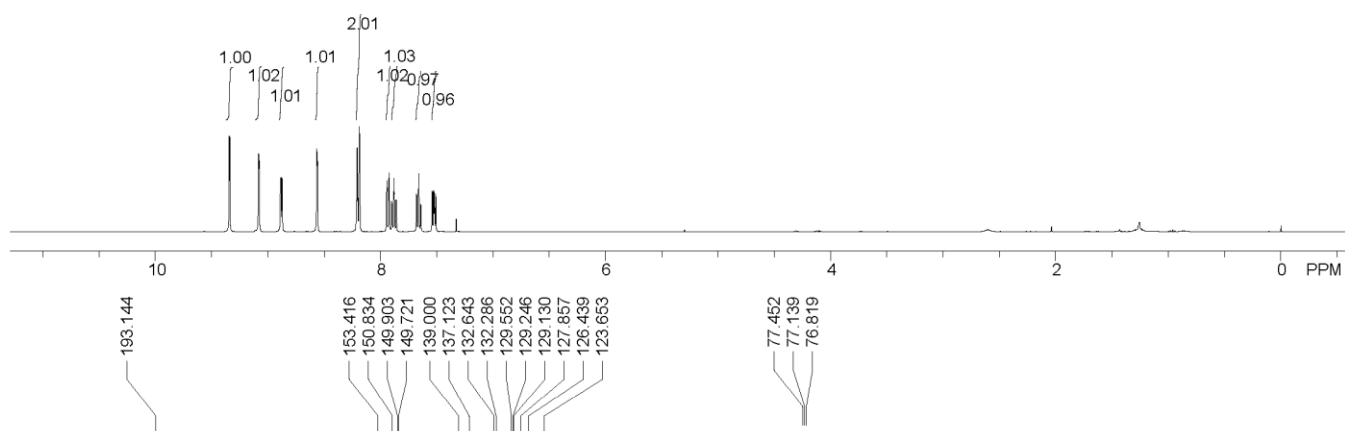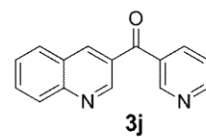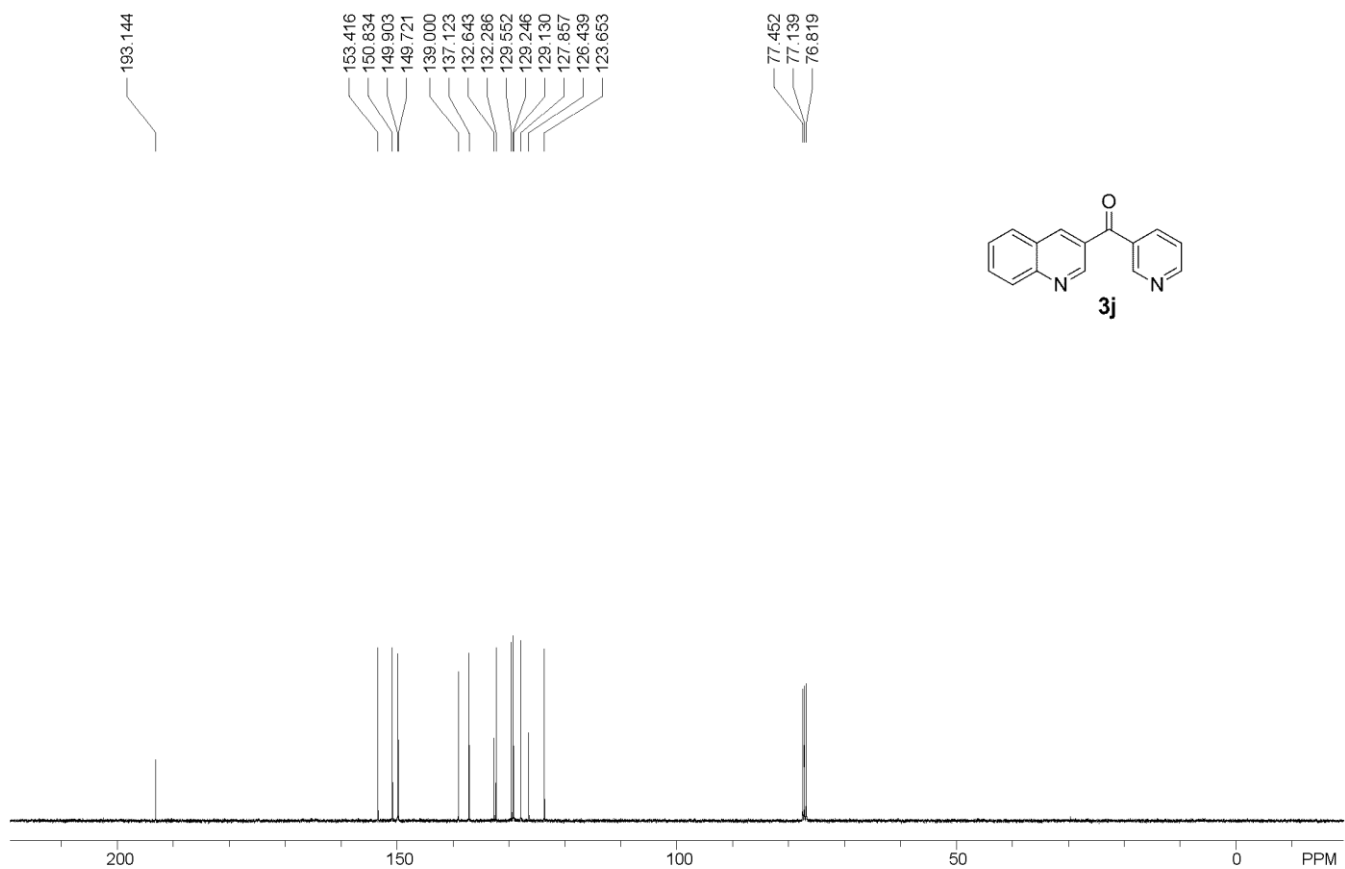

9.340  
9.337  
8.642  
8.638  
8.189  
8.175  
7.946  
7.945  
7.944  
7.933  
7.932  
7.931  
7.854  
7.851  
7.842  
7.840  
7.837  
7.828  
7.826  
7.798  
7.796  
7.790  
7.788  
7.716  
7.715  
7.710  
7.708  
7.652  
7.650  
7.640  
7.638  
7.637  
7.627  
7.625  
7.222  
7.216  
7.214  
7.208

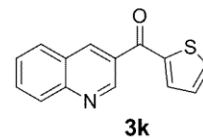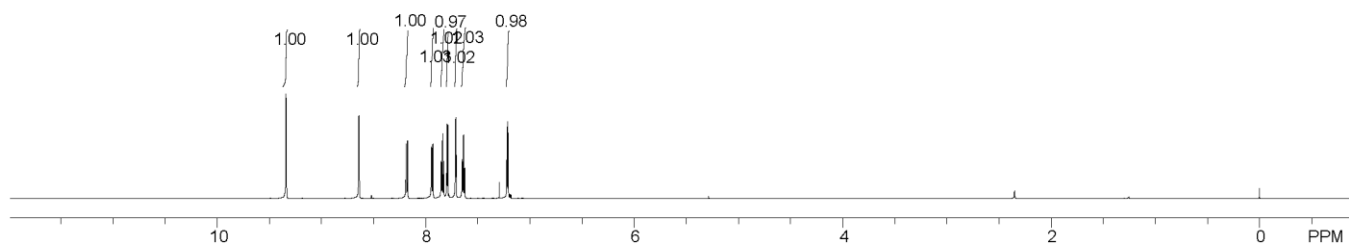

186.154  
149.637  
149.484  
143.213  
137.715  
135.104  
135.082  
131.772  
130.671  
129.512  
129.103  
128.374  
127.689  
126.646  
77.361  
77.149  
76.930

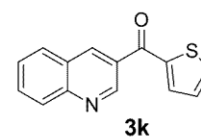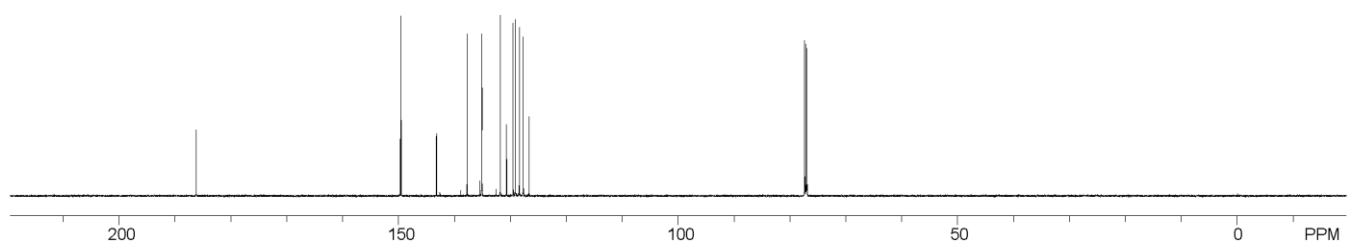

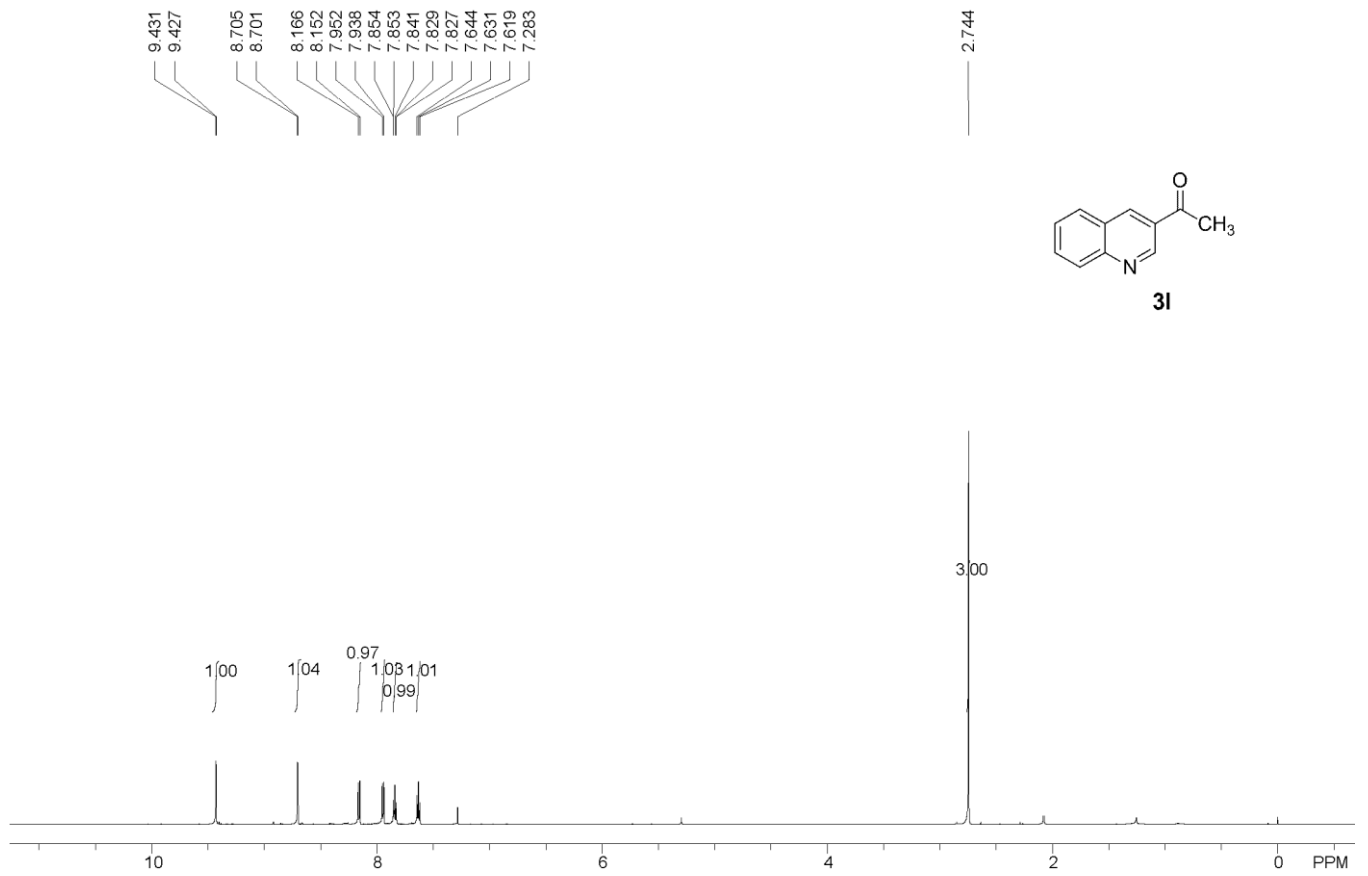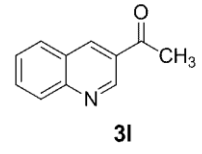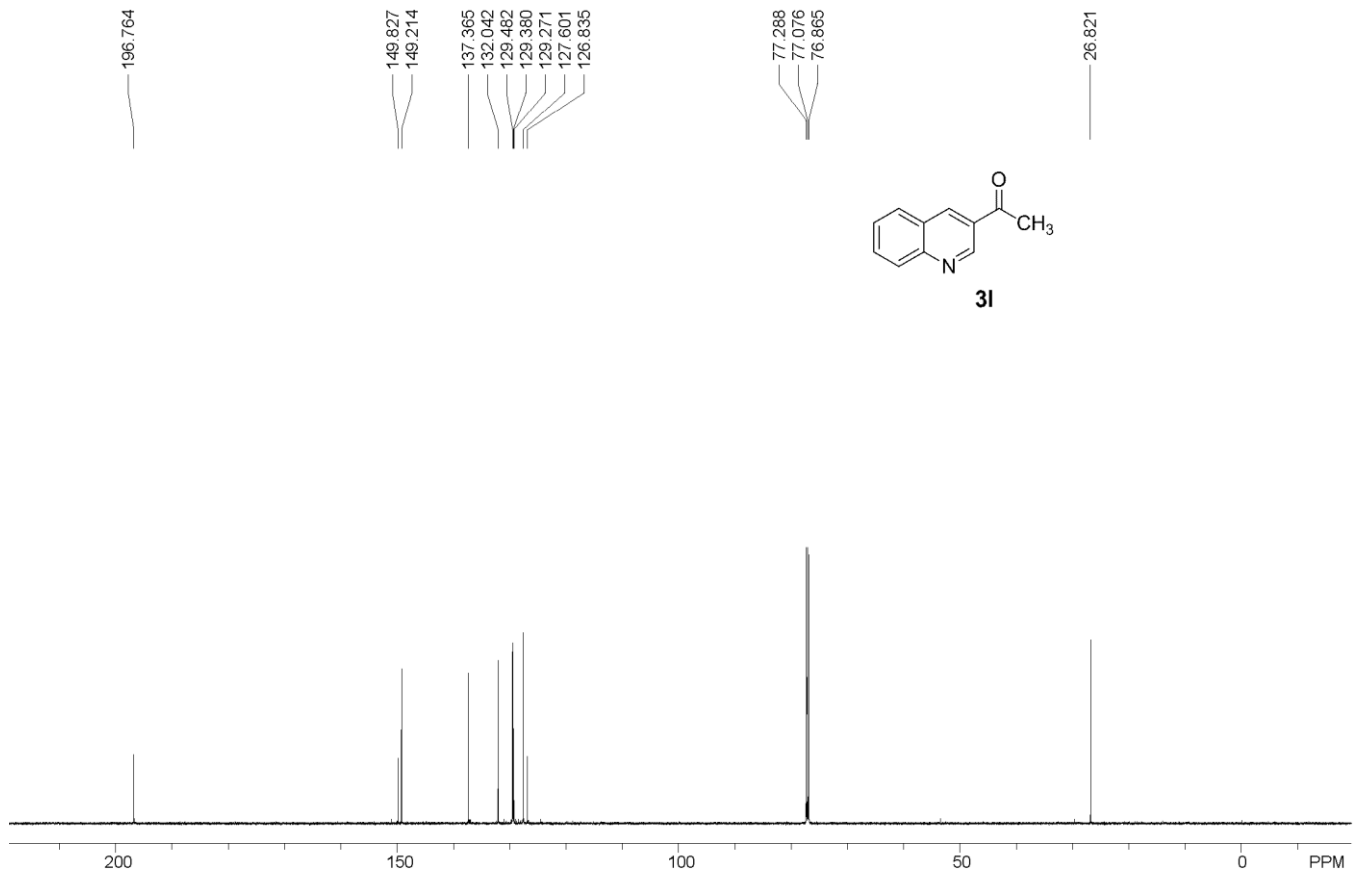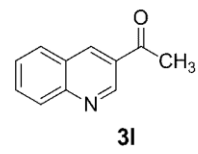

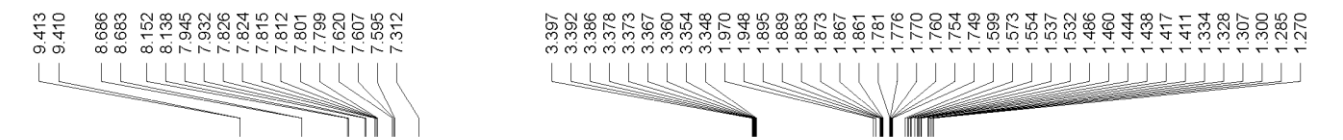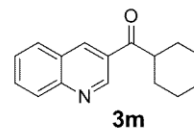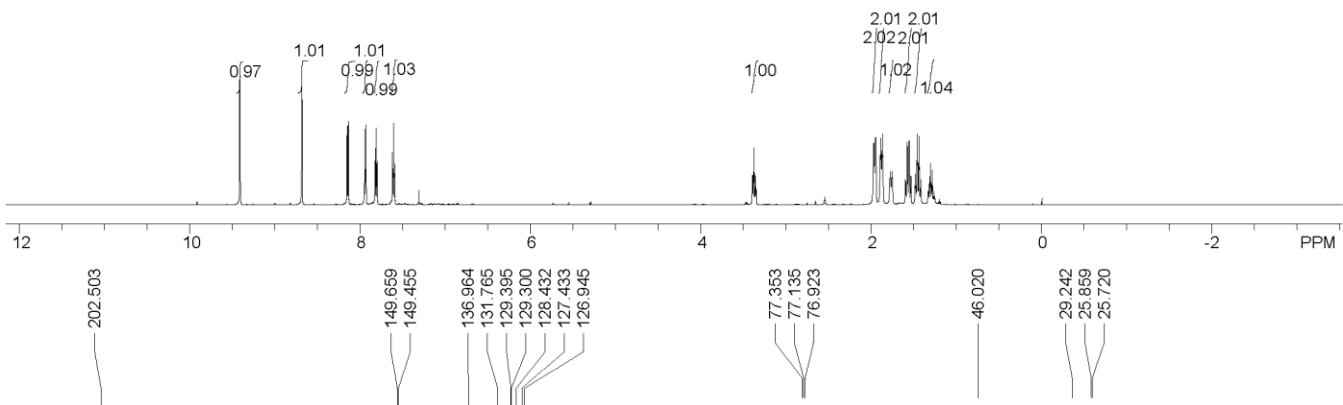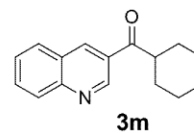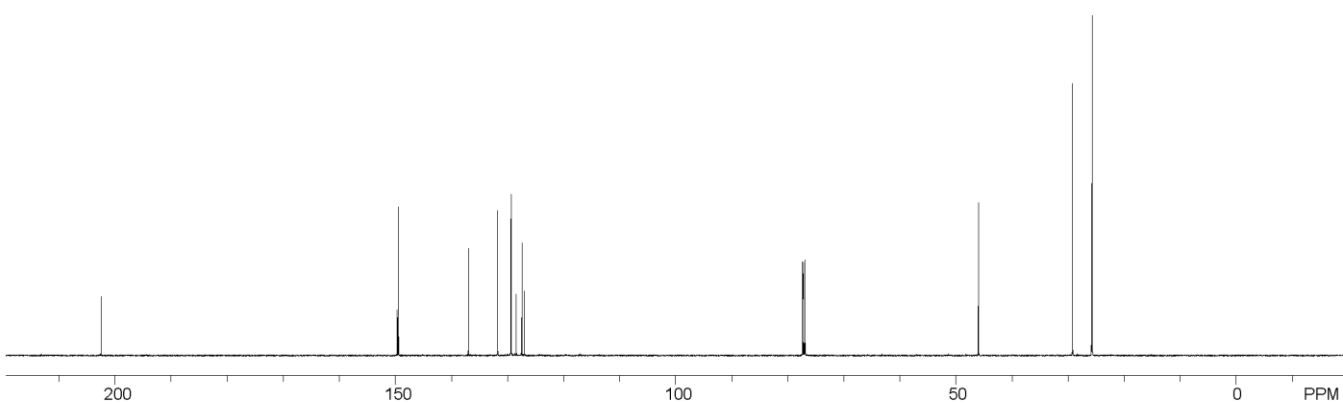

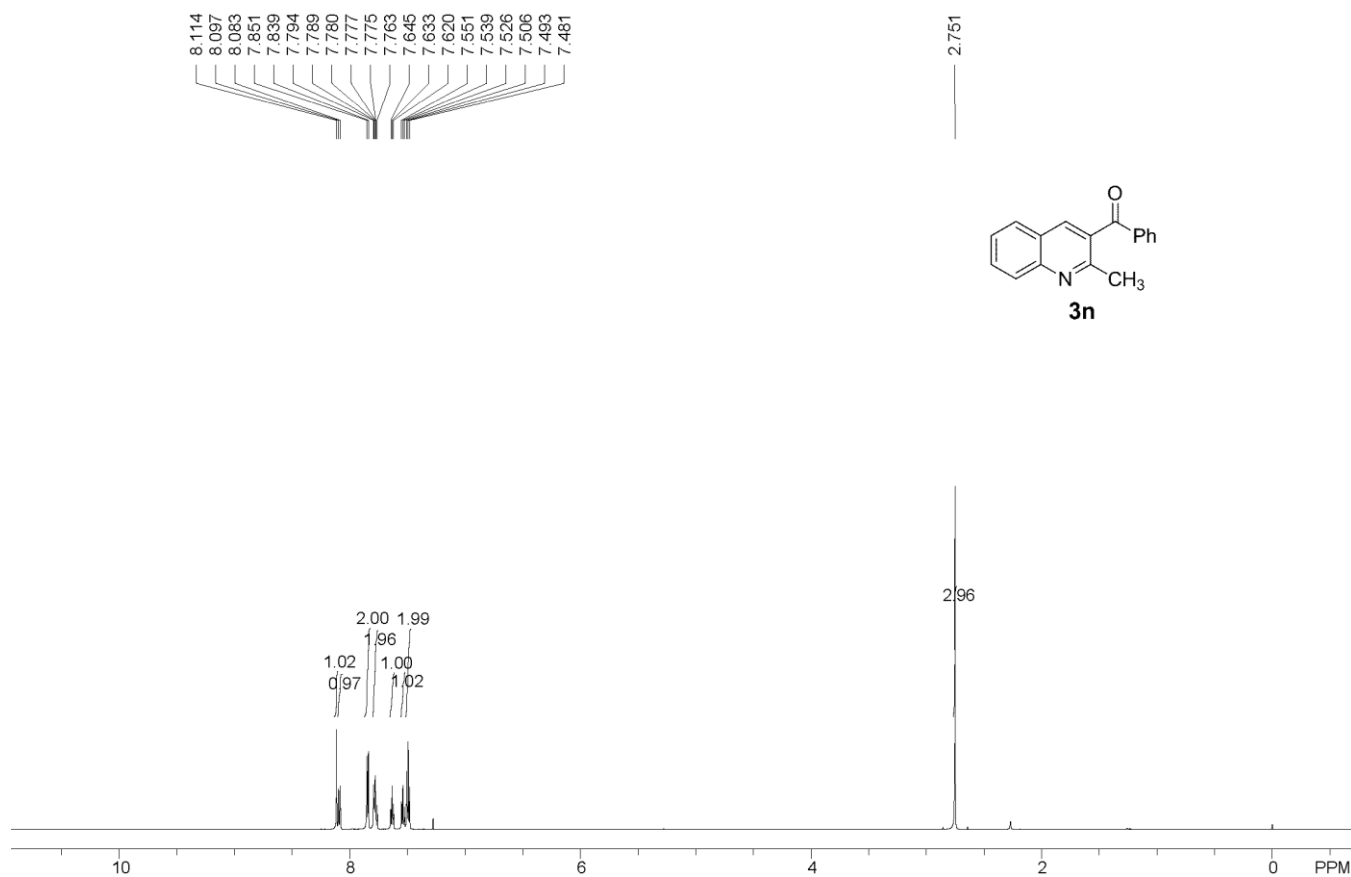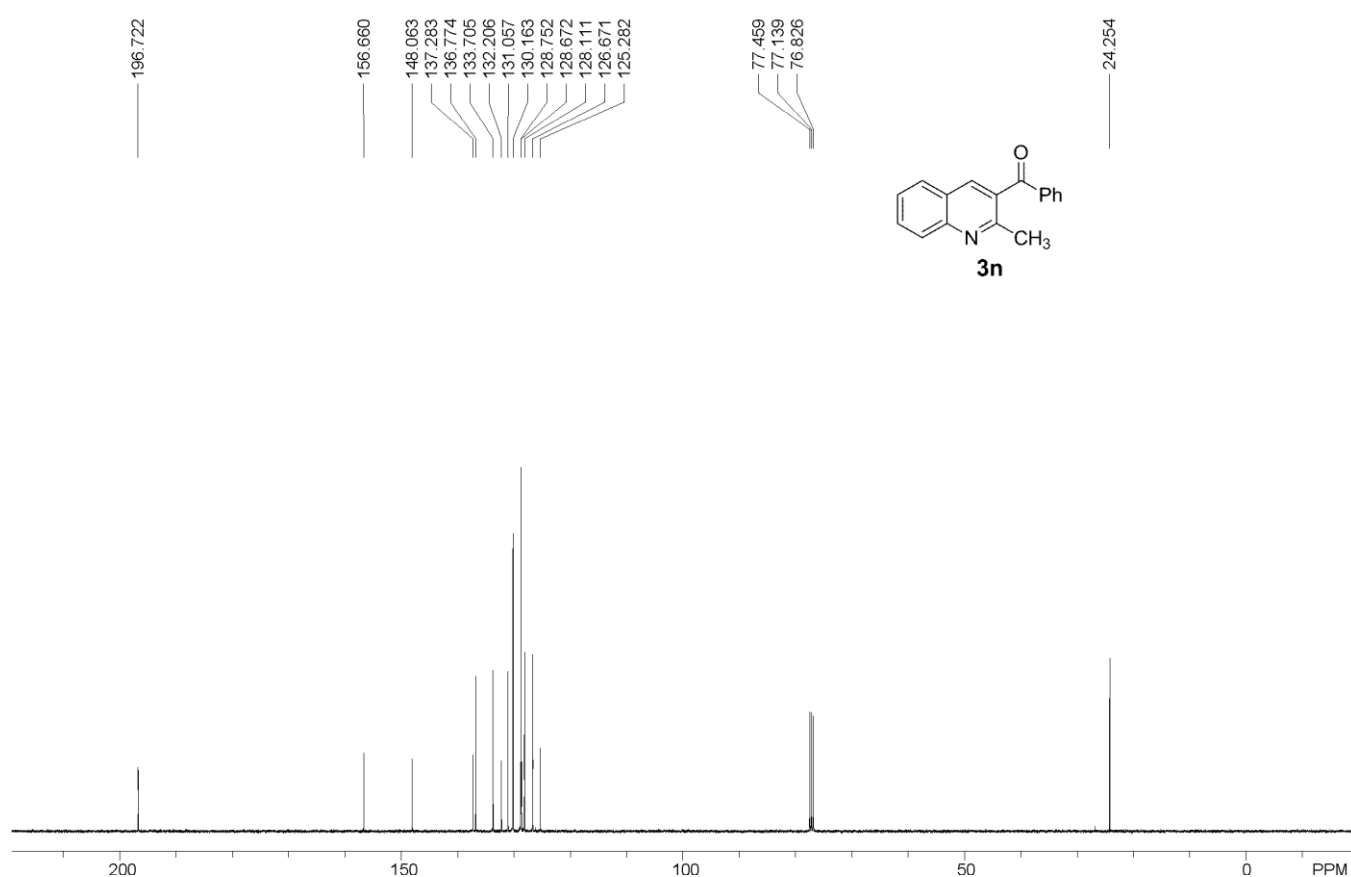



8.308  
8.250  
8.228  
7.868  
7.848  
7.817  
7.813  
7.800  
7.796  
7.793  
7.779  
7.775  
7.712  
7.699  
7.694  
7.691  
7.638  
7.634  
7.617  
7.614  
7.589  
7.587  
7.572  
7.569  
7.567  
7.551  
7.549  
7.482  
7.449  
7.446  
7.430  
7.415  
7.412  
7.409  
7.409  
7.313  
7.293  
7.283  
7.279  
7.274  
7.267  
7.264  
7.260  
7.249  
7.246  
7.242  
7.238  
7.231  
7.228

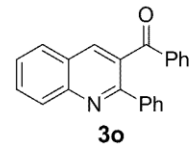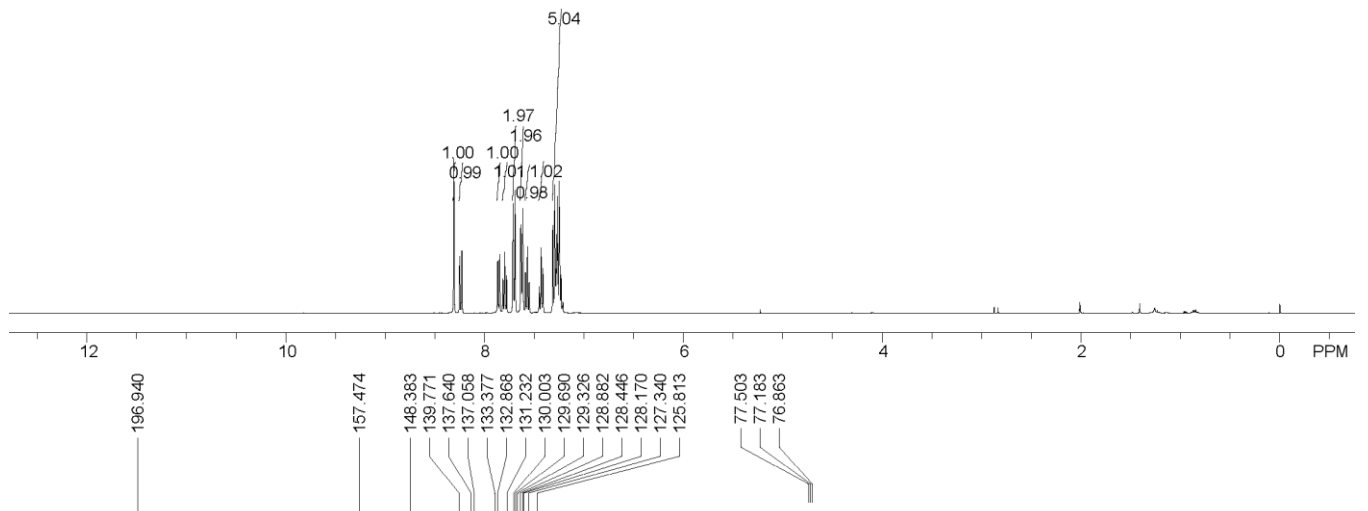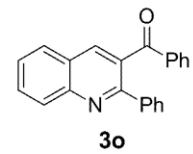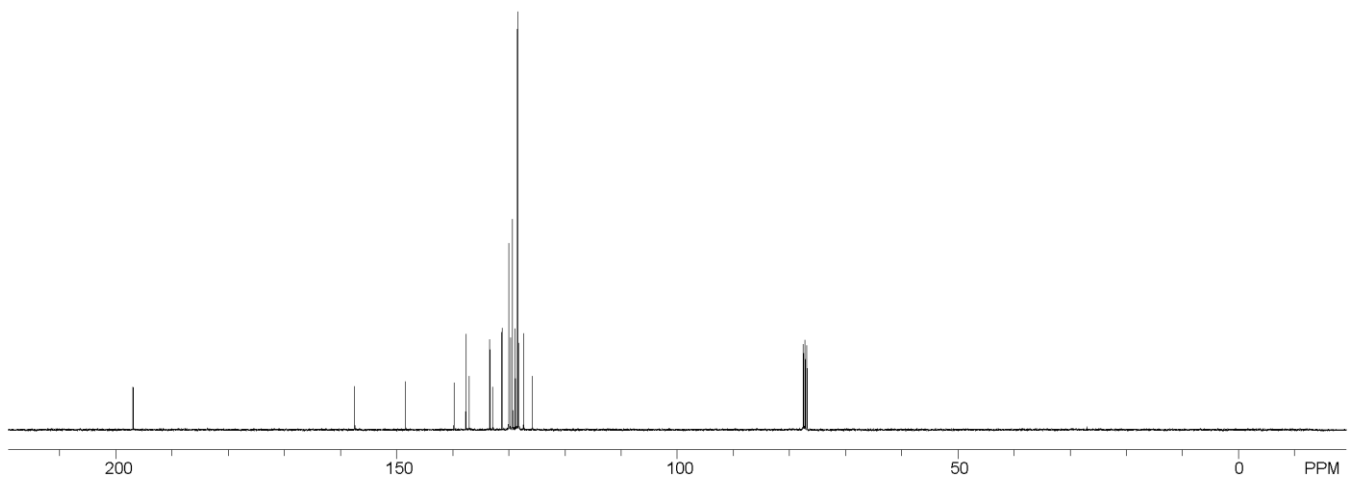

8.209  
8.194  
8.062  
7.765  
7.753  
7.743  
7.656  
7.654  
7.648  
7.642  
7.636  
7.631  
7.587  
7.575  
7.561  
7.548  
7.536  
7.369  
7.356  
7.344  
7.278

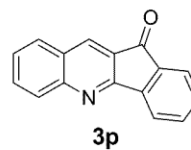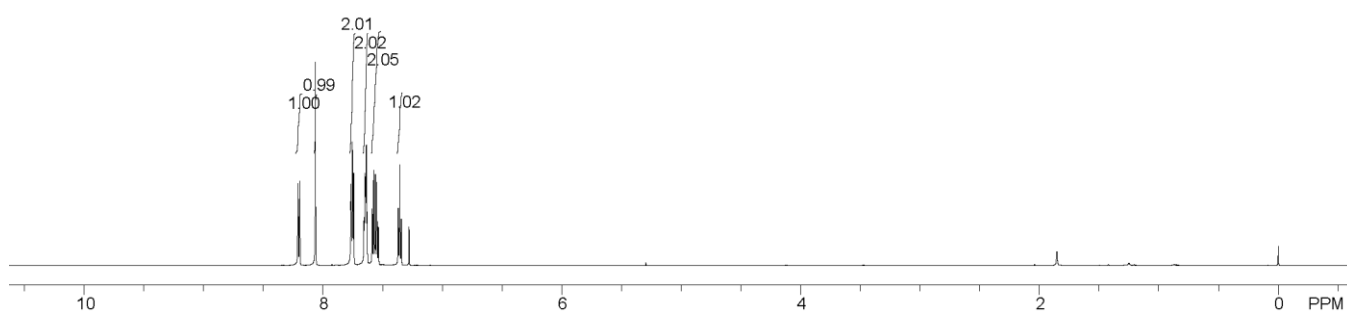

192.272  
154.340  
148.616  
142.593  
136.140  
134.295  
133.741  
131.663  
130.080  
129.949  
129.490  
129.213  
128.476  
126.216  
124.903  
121.644  
77.285  
77.083  
76.872

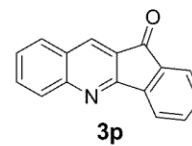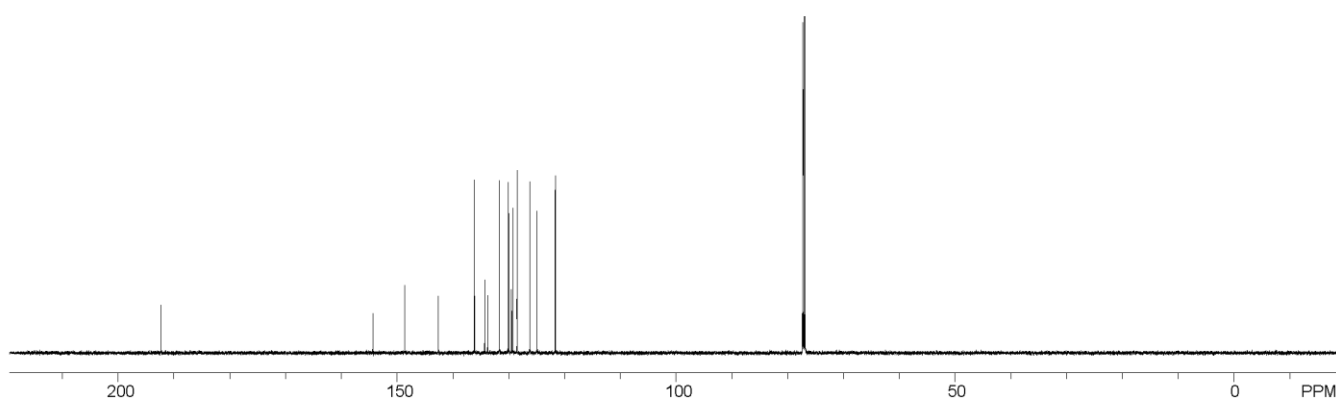

9.515  
9.511  
9.248  
9.245  
9.241  
9.238  
8.626  
8.623  
8.353  
8.350  
8.339  
8.336  
7.876  
7.864  
7.691  
7.679  
7.666  
7.630  
7.623  
7.617  
7.610  
7.572  
7.559  
7.546

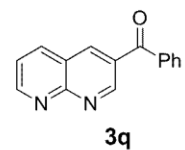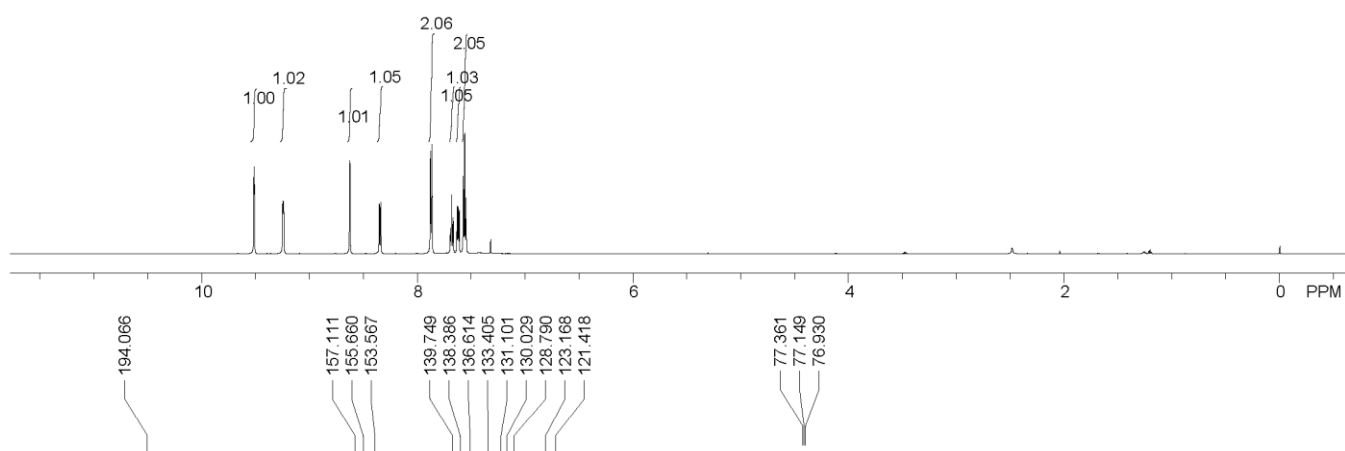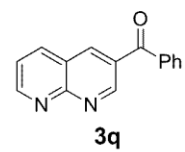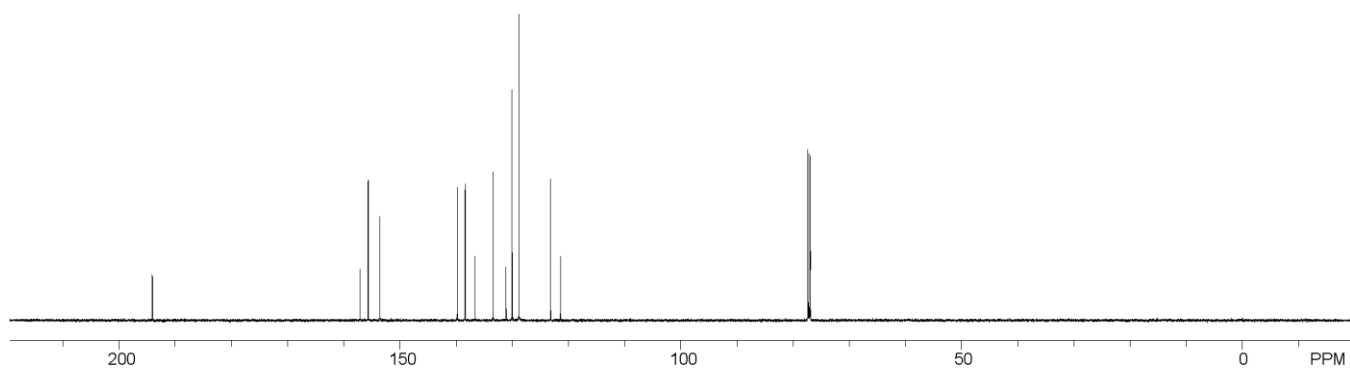

9.544  
9.537  
9.287  
9.283  
9.277  
9.273  
9.089  
9.085  
8.914  
8.910  
8.902  
8.898  
8.666  
8.669  
8.383  
8.378  
8.363  
8.358  
8.238  
8.228  
8.218  
8.214  
8.209  
7.674  
7.664  
7.654  
7.643  
7.577  
7.565  
7.557  
7.545  
7.323

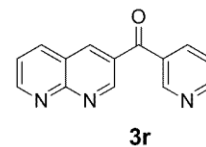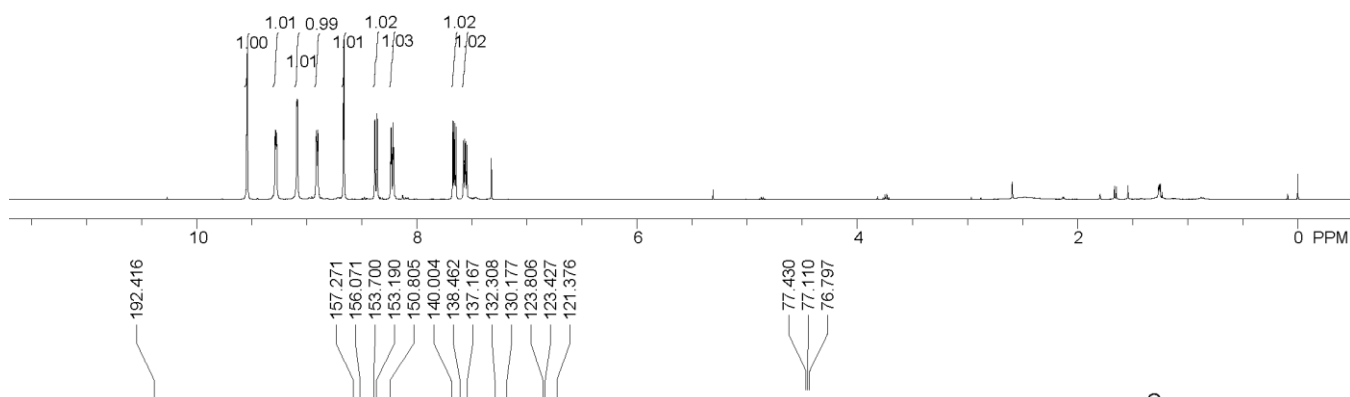

192.416  
157.271  
156.071  
153.700  
153.190  
150.805  
140.004  
138.462  
137.167  
132.308  
130.177  
123.806  
123.427  
121.376  
77.430  
77.110  
76.797

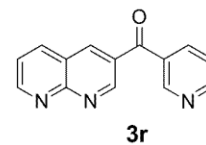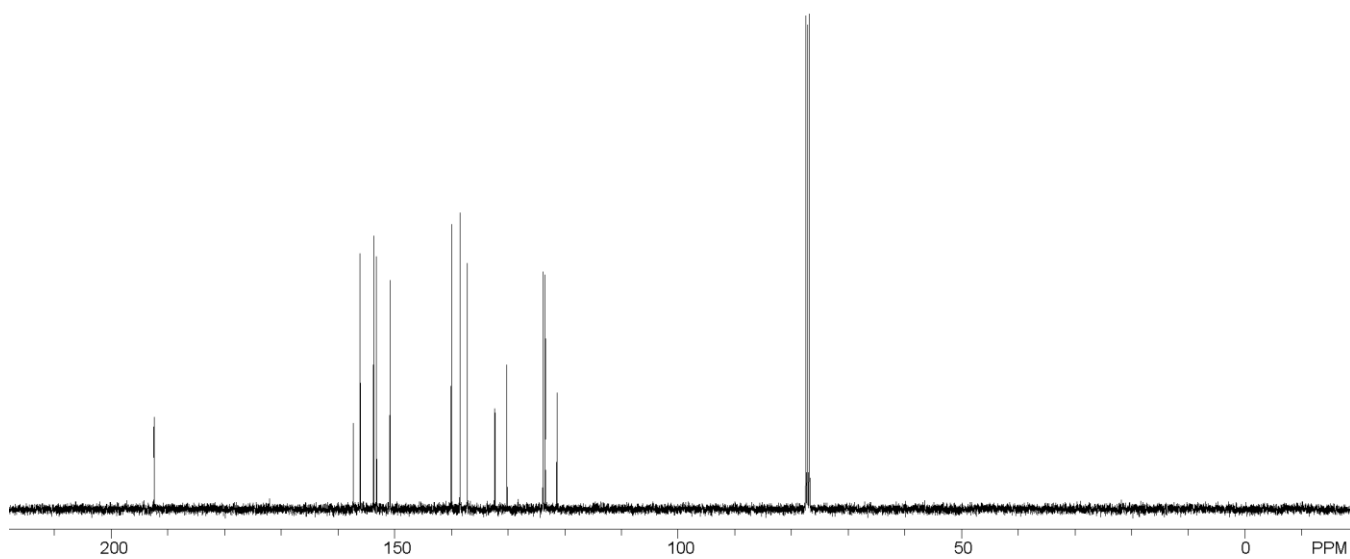

## V. Copies of $^1\text{H}$ and $^{13}\text{C}$ NMR spectra of 5a-5l

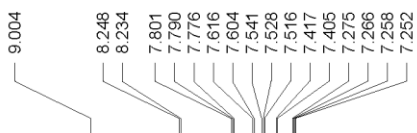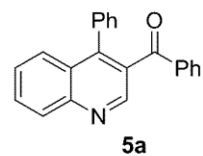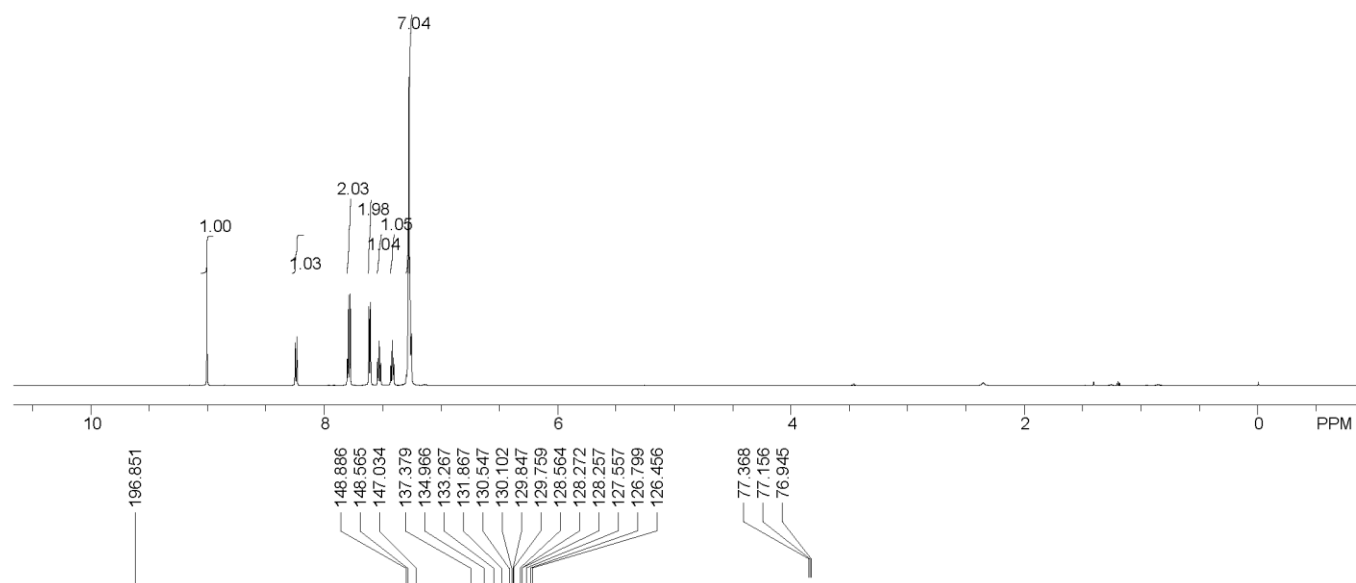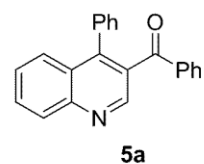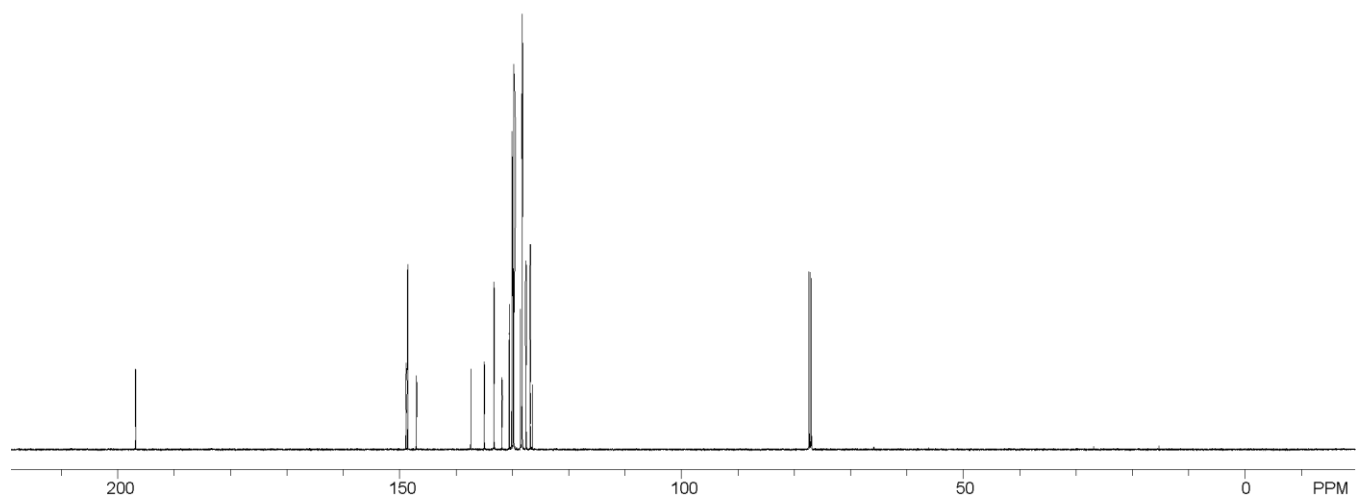

8.963  
8.237  
8.223  
7.797  
7.784  
7.770  
7.638  
7.624  
7.542  
7.529  
7.516  
7.314  
7.303  
7.297  
7.291  
7.271  
6.779  
6.765

3.791

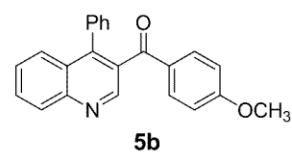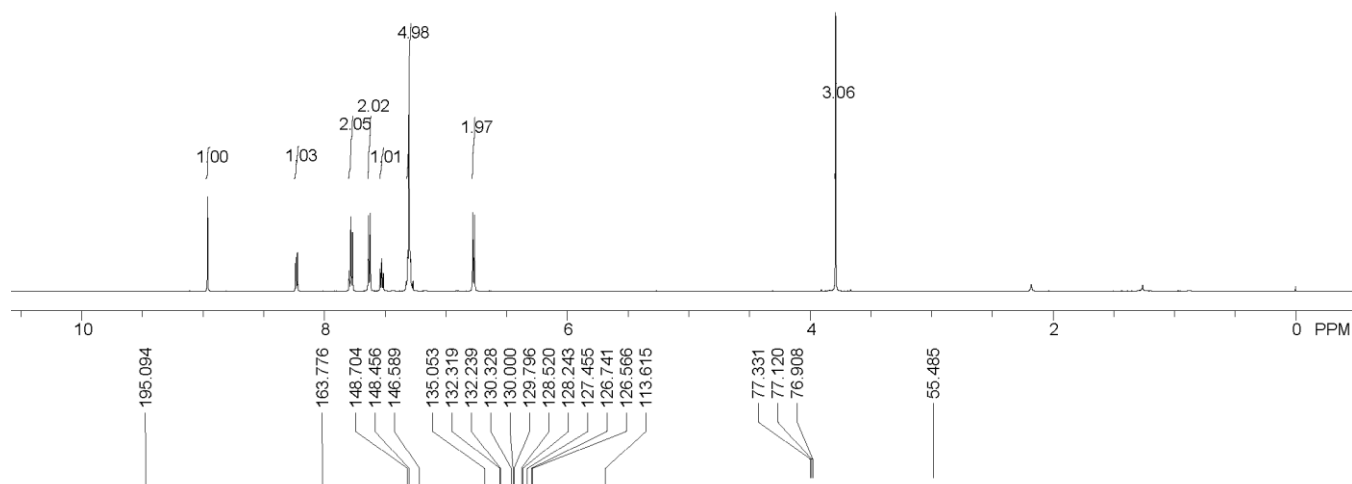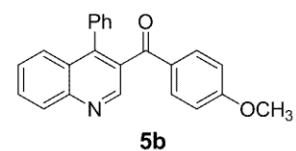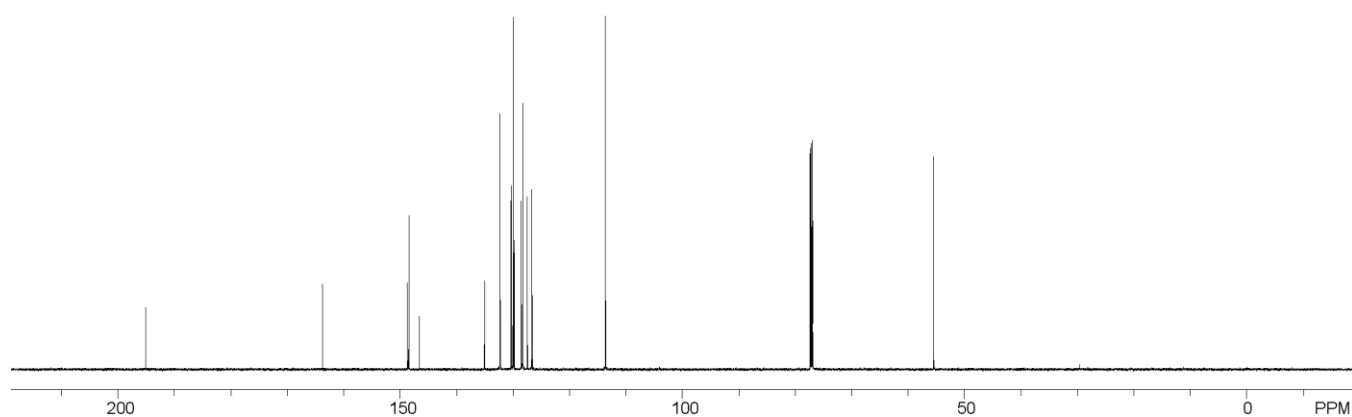

9.043  
8.260  
8.246  
7.829  
7.816  
7.803  
7.685  
7.651  
7.567  
7.554  
7.542  
7.507  
7.493  
7.286  
7.285  
7.279  
7.268  
7.258  
7.250  
7.246  
7.242  
7.236

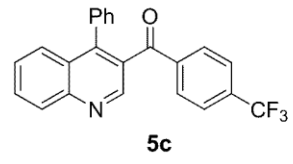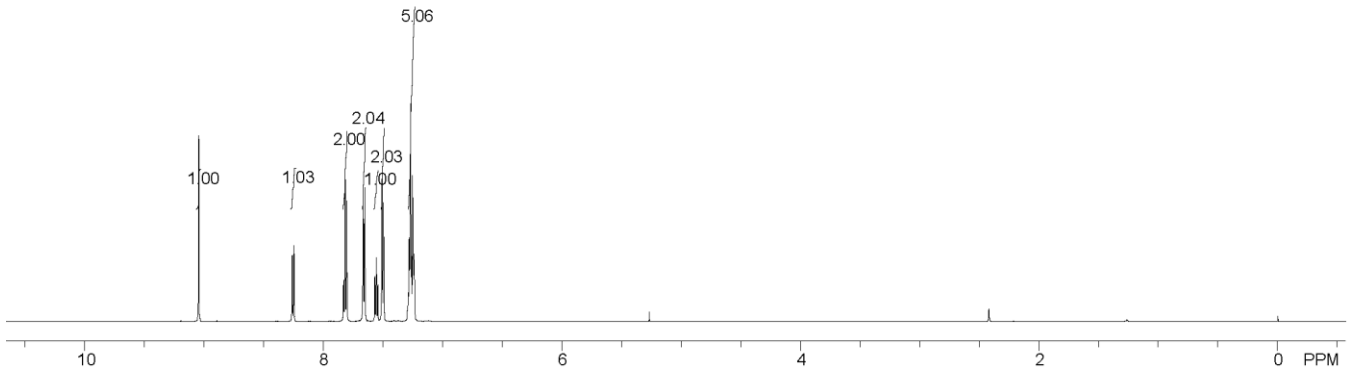

196.137  
149.170  
148.485  
147.376  
140.325  
134.740  
134.368  
134.149  
133.930  
133.719  
131.057  
130.912  
130.190  
129.920  
129.738  
128.826  
128.381  
127.776  
126.782  
126.165  
125.202  
125.180  
125.158  
125.129  
124.364  
122.555  
120.747  
77.339  
77.127  
76.916

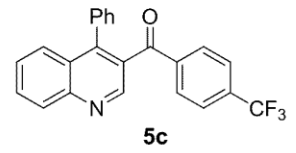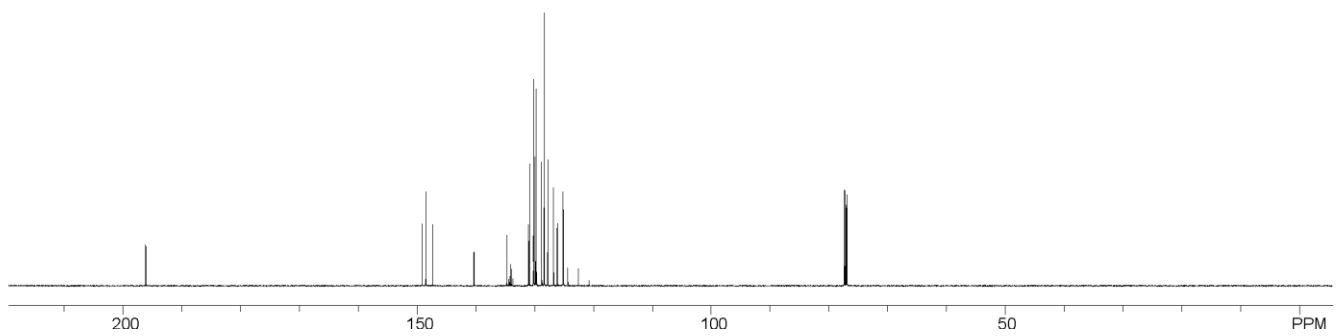

9.041  
 8.244  
 8.242  
 8.222  
 8.219  
 7.815  
 7.811  
 7.797  
 7.793  
 7.790  
 7.779  
 7.776  
 7.612  
 7.609  
 7.600  
 7.596  
 7.562  
 7.559  
 7.545  
 7.541  
 7.538  
 7.524  
 7.521  
 7.367  
 7.355  
 7.340  
 7.336  
 7.288  
 7.286  
 7.279  
 7.276  
 6.978  
 6.968  
 6.956

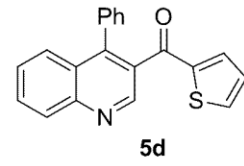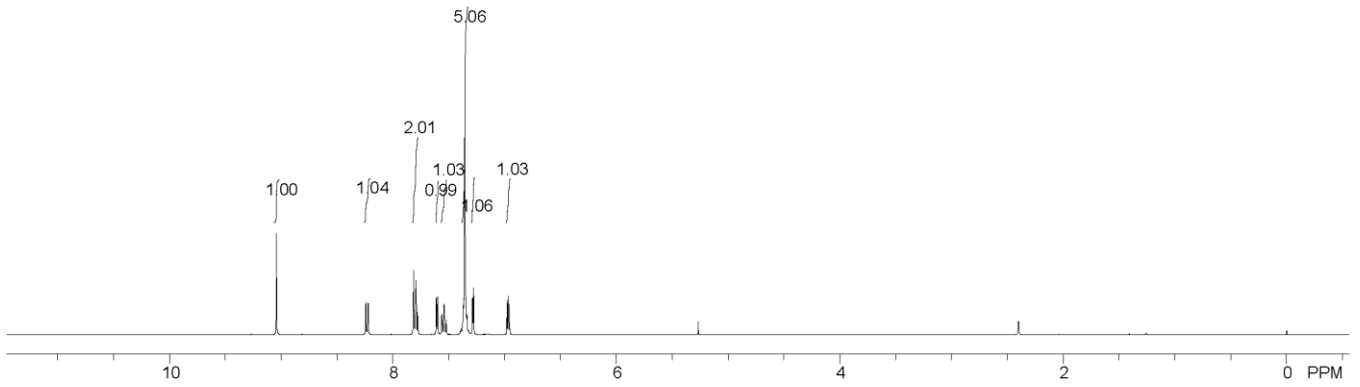

188.313  
 148.842  
 148.062  
 146.815  
 144.503  
 135.622  
 135.360  
 134.864  
 131.874  
 130.591  
 130.073  
 129.625  
 128.673  
 128.359  
 128.080  
 127.594  
 126.908  
 126.544  
 77.375  
 77.164  
 76.952

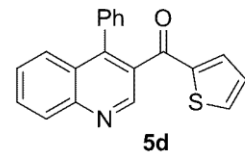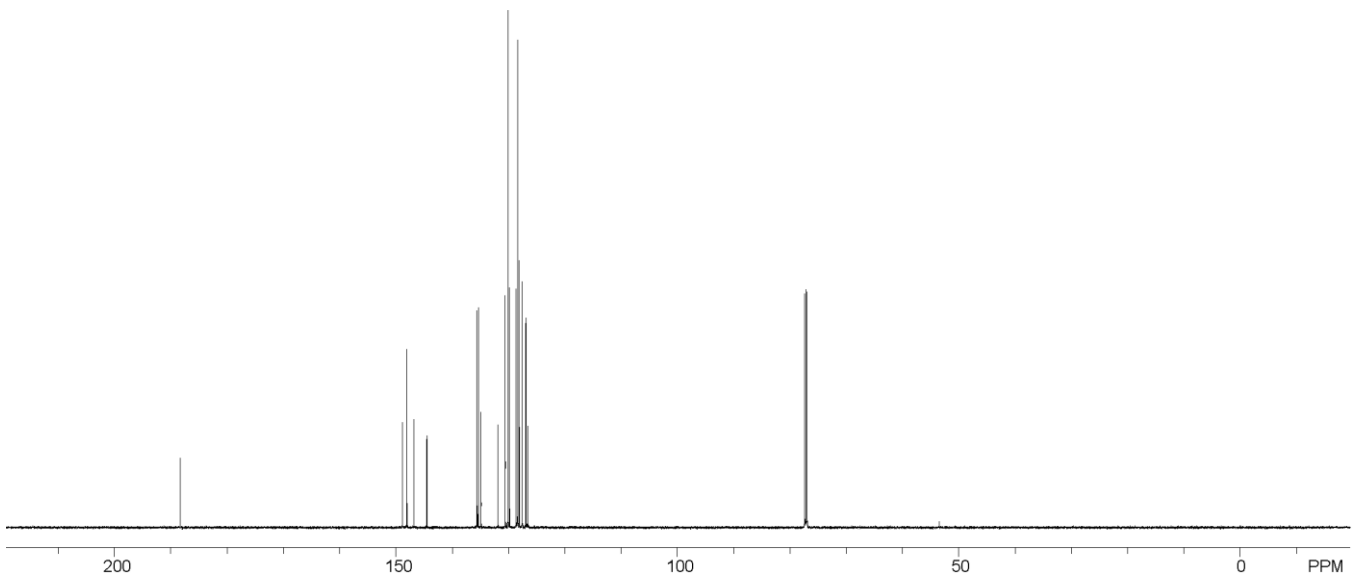



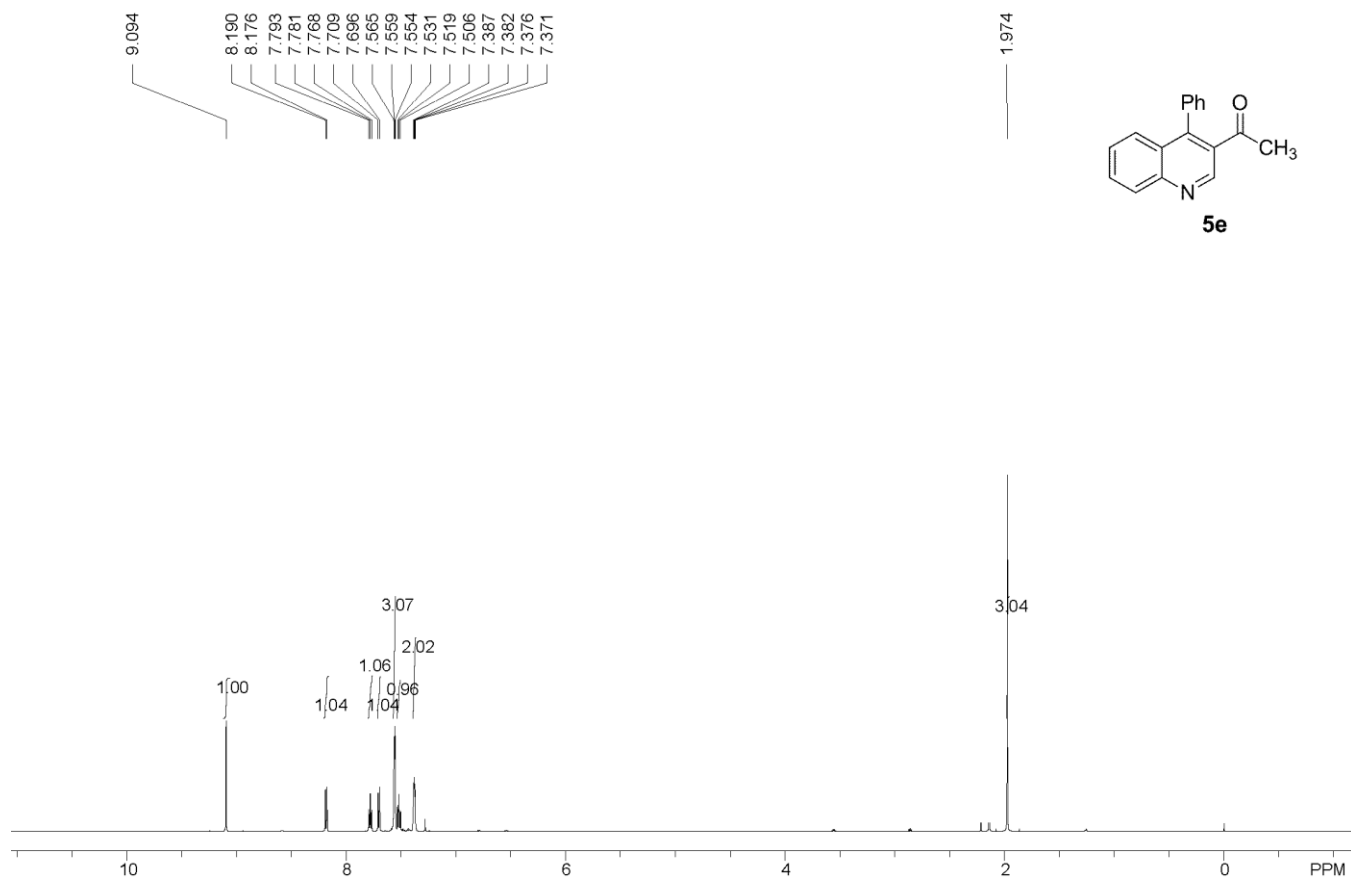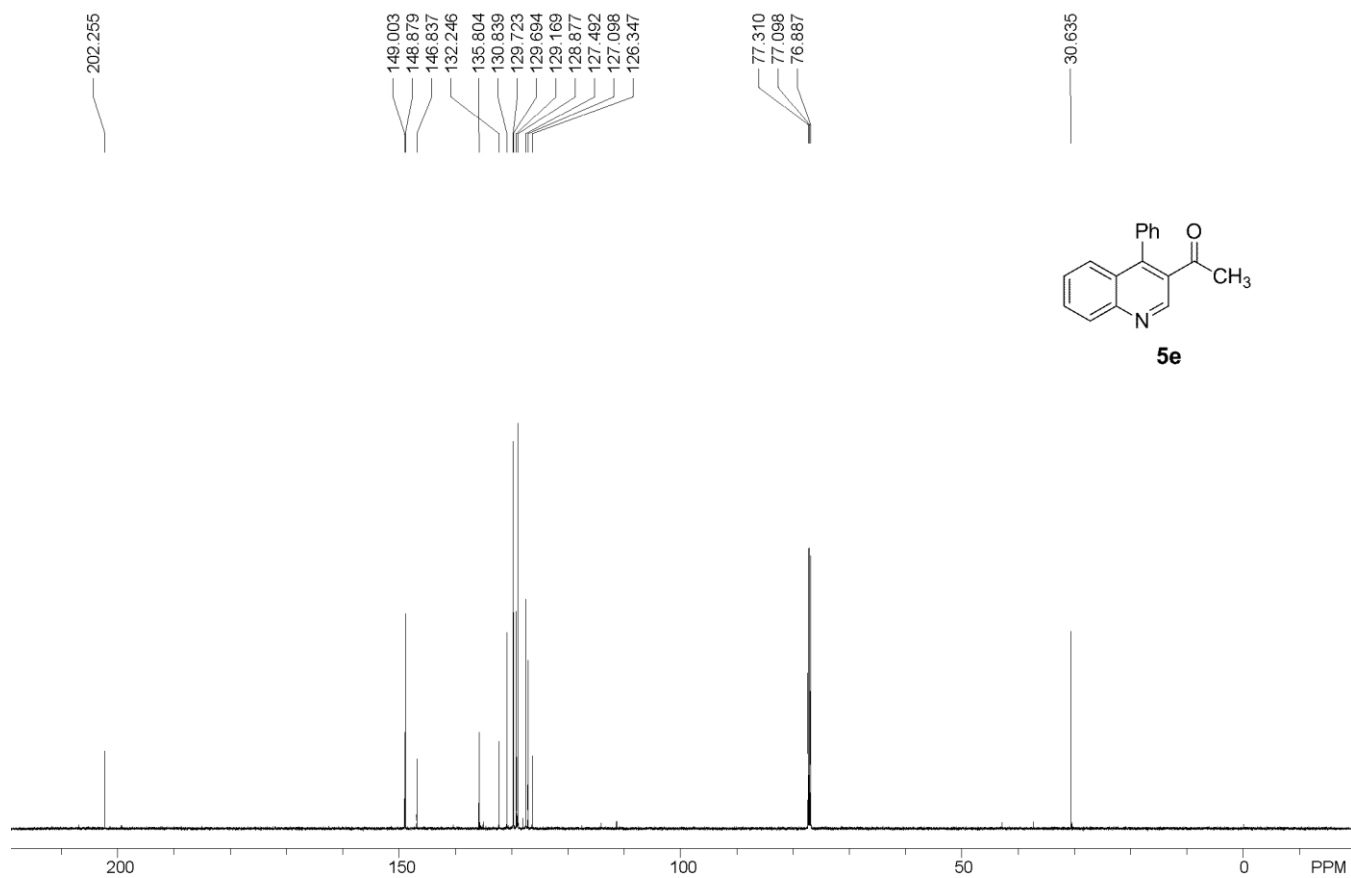

8.978  
8.181  
8.166  
7.752  
7.748  
7.735  
7.731  
7.720  
7.716  
7.608  
7.596  
7.447  
7.434  
7.422  
7.318  
7.308  
7.303  
7.296  
7.280  
7.267  
7.255

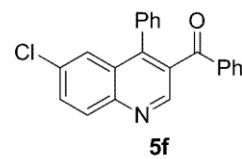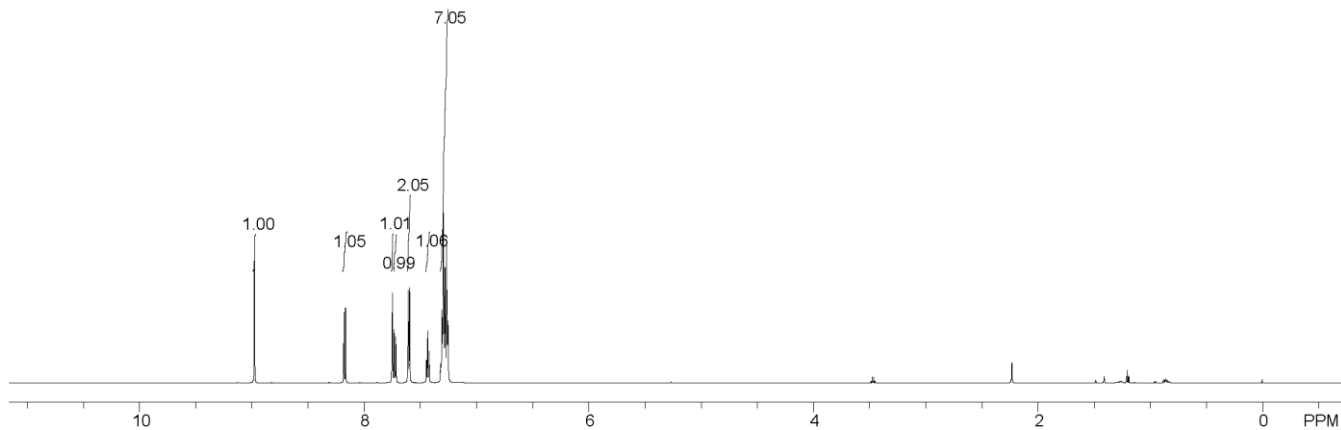

196.421  
148.696  
147.253  
146.108  
137.095  
134.280  
133.646  
133.442  
132.618  
131.488  
131.444  
129.986  
129.730  
128.870  
128.483  
128.345  
127.288  
125.472  
77.353  
77.142  
76.930

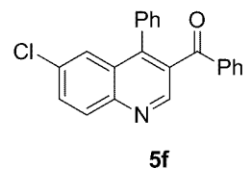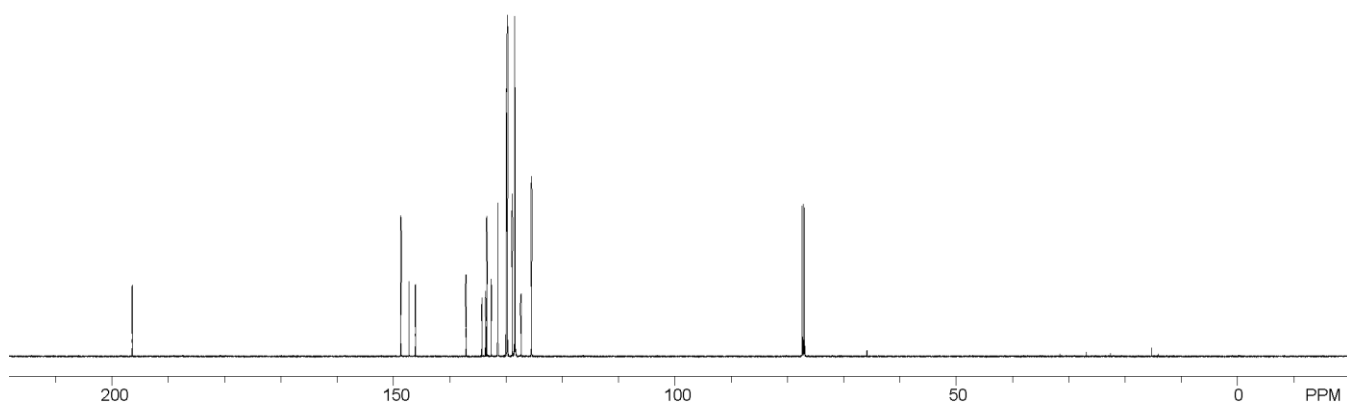

8.820  
8.181  
8.160  
8.137  
8.136  
8.116  
8.115  
7.856  
7.838  
7.835  
7.825  
7.822  
7.804  
7.786  
7.783  
7.680  
7.677  
7.659  
7.649  
7.641  
7.639  
7.630  
7.612  
7.509  
7.490  
7.471  
7.271

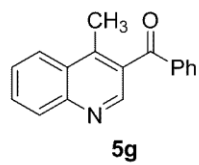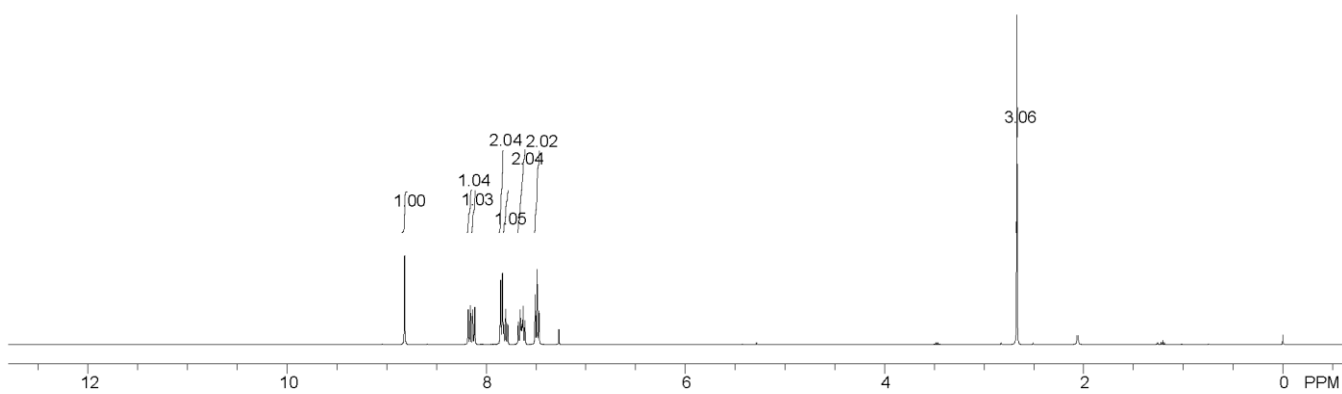

197.006

148.637  
148.077  
143.604  
137.538  
133.872  
131.937  
130.424  
130.235  
130.148  
128.832  
127.631  
127.348  
124.453

77.386  
77.066  
76.746

15.904

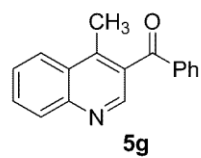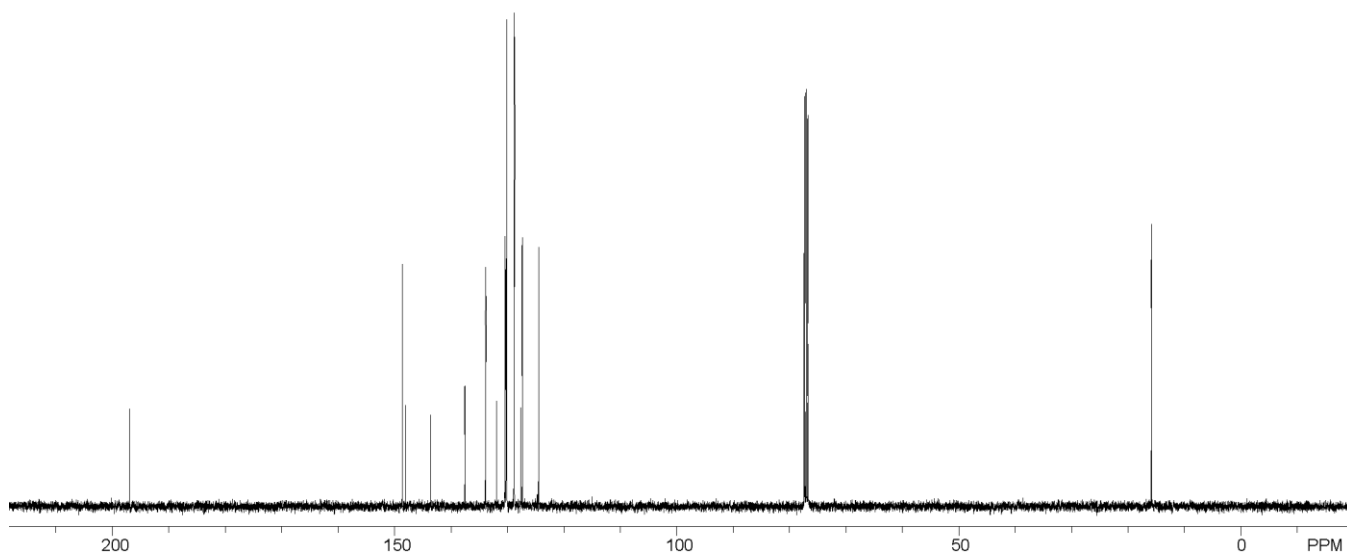

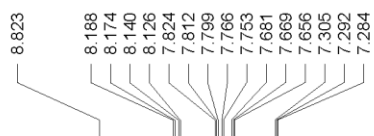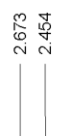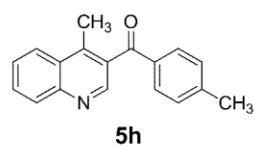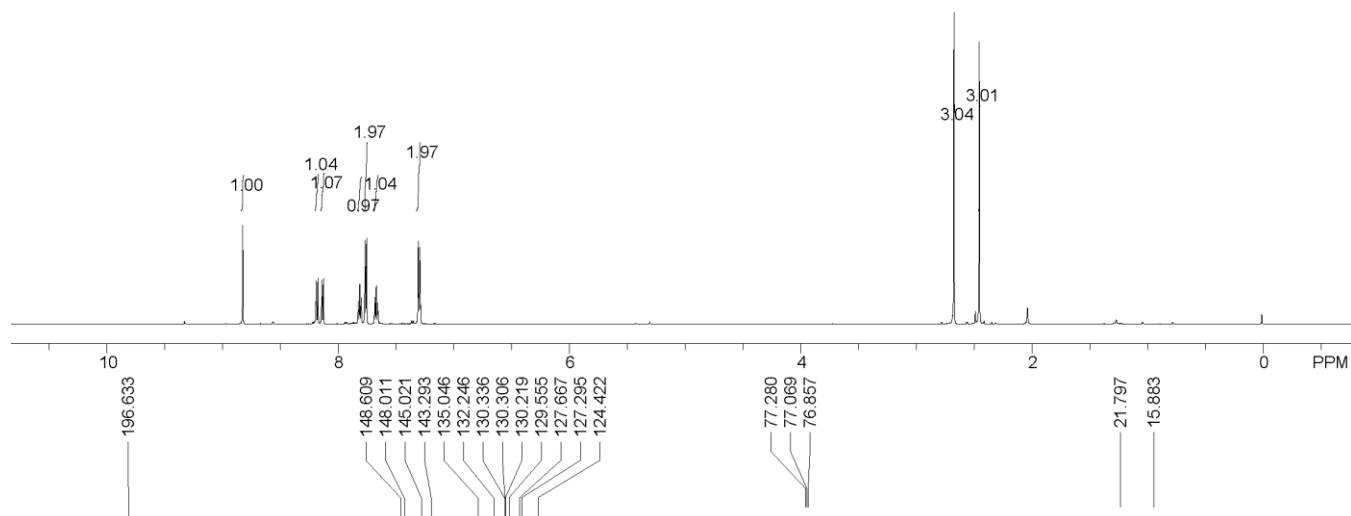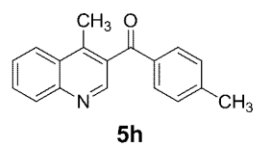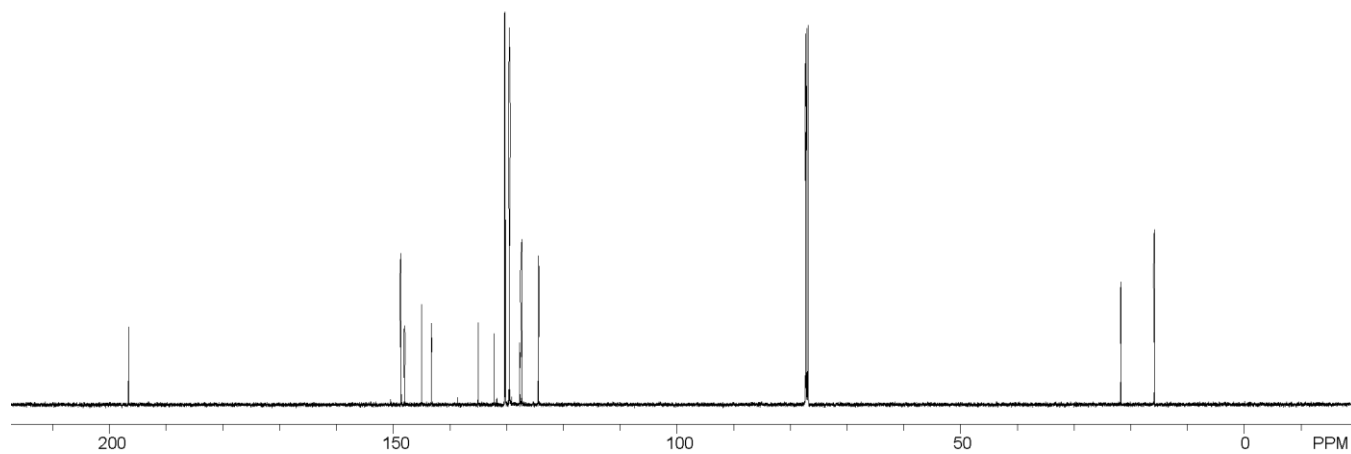

8.807  
8.168  
8.154  
8.112  
8.099  
7.829  
7.814  
7.799  
7.786  
7.773  
7.657  
7.643  
7.631  
7.284  
6.957  
6.942

3.875

2.651

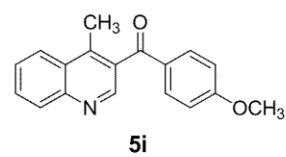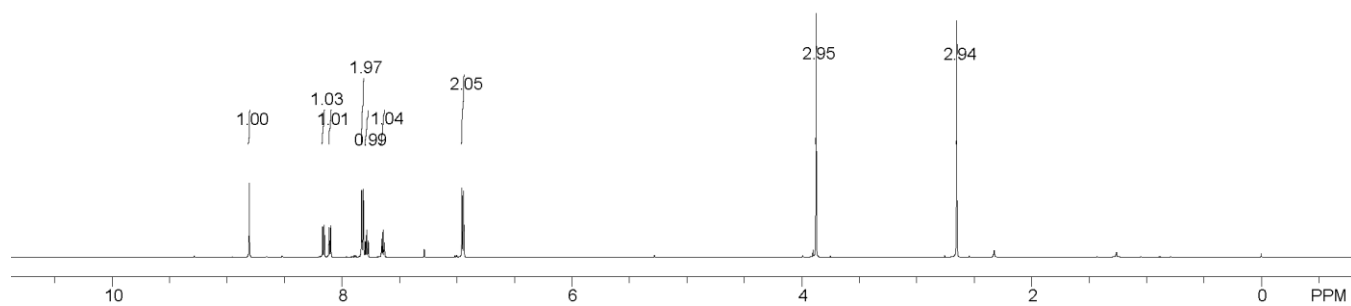

195.473

164.264

148.492

147.938

142.943

132.589

132.421

130.489

130.197

127.659

127.258

124.371

114.082

77.324

77.113

76.901

55.602

15.632

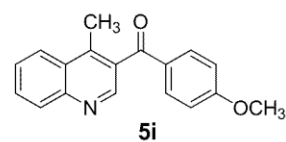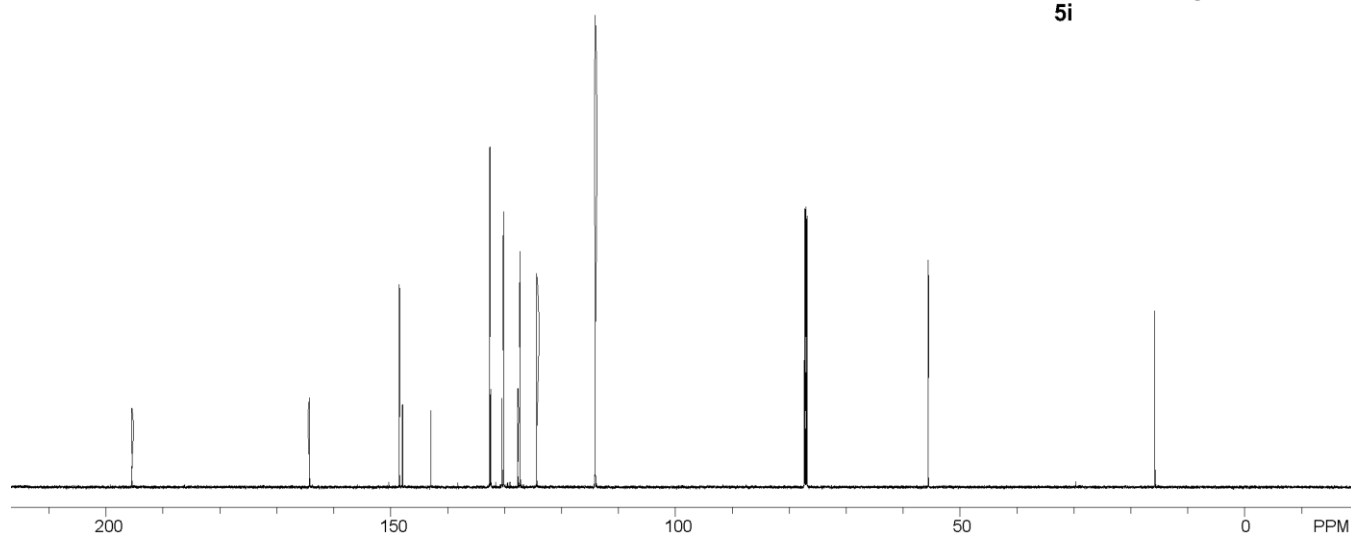

8.813  
8.193  
8.179  
8.153  
8.139  
7.847  
7.834  
7.821  
7.813  
7.799  
7.702  
7.689  
7.676  
7.493  
7.479  
7.284

2.685

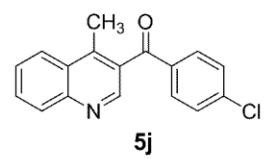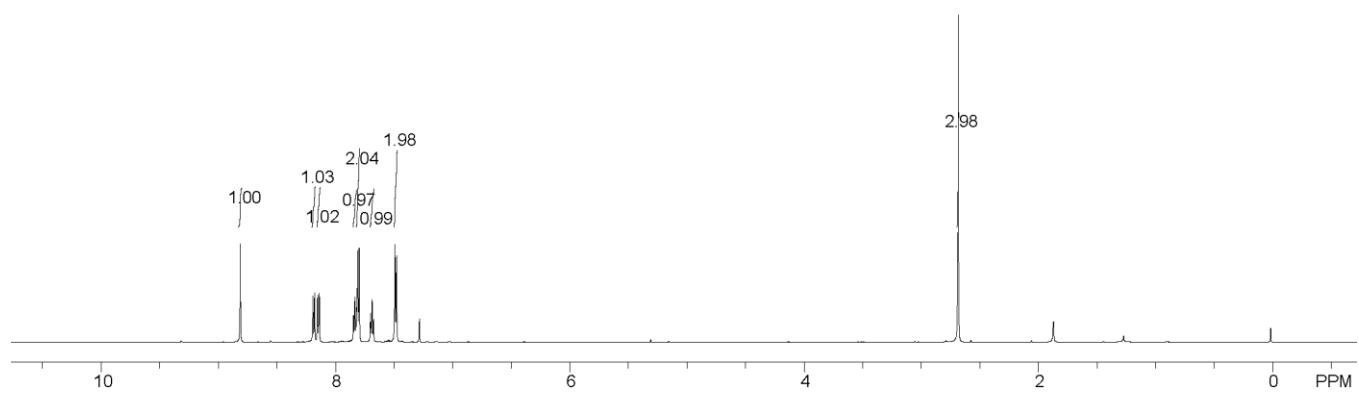

195.743

148.419  
148.157  
143.752  
140.537  
135.892  
131.488  
131.444  
130.613  
130.284  
129.227  
127.587  
127.484  
124.473

77.266  
77.054  
76.843

15.942

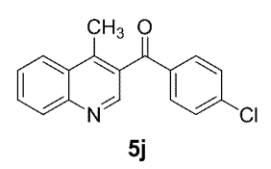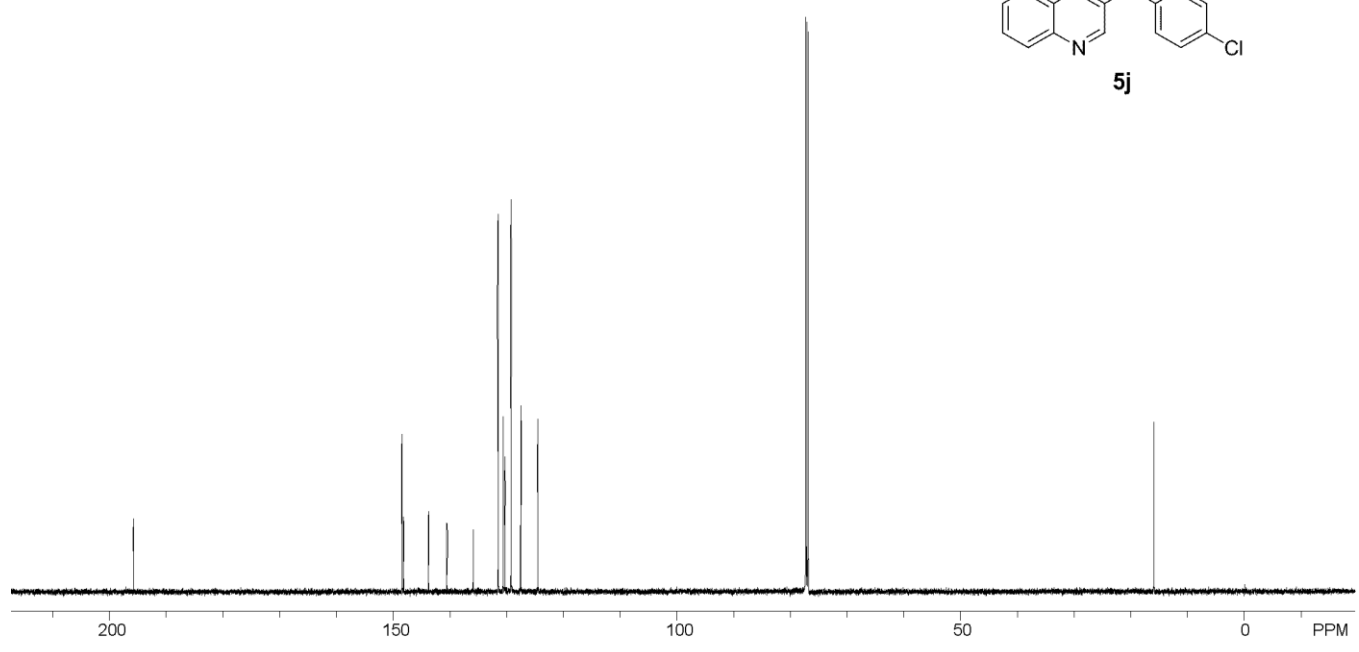

8.810  
8.189  
8.175  
8.157  
8.143  
7.969  
7.956  
7.851  
7.849  
7.837  
7.825  
7.824  
7.775  
7.761  
7.702  
7.690  
7.678  
7.268

2.692

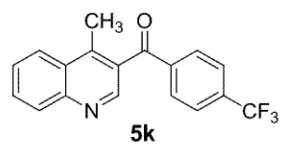

1.00  
1.03  
1.01  
2.01  
1.04  
2.02  
1.02

2.95

10 8 6 4 2 0 PPM

195.940

148.470

148.288

144.277

140.333

135.338

135.119

134.907

134.689

131.021

130.839

130.379

130.328

127.601

126.208

125.946

125.924

125.895

125.873

124.546

124.400

122.592

120.783

77.251

77.040

76.828

16.000

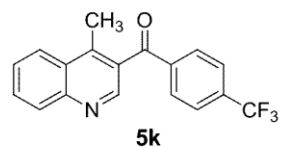

200

150

100

50

0

PPM

8.980  
8.765  
8.753  
8.497  
8.483  
8.466  
8.453  
8.029  
8.016  
8.003  
7.894  
7.881  
7.860  
7.846  
7.609  
7.596  
7.584  
7.544  
7.532  
7.519  
7.450  
7.437  
7.424  
7.421  
7.407  
7.279

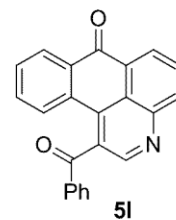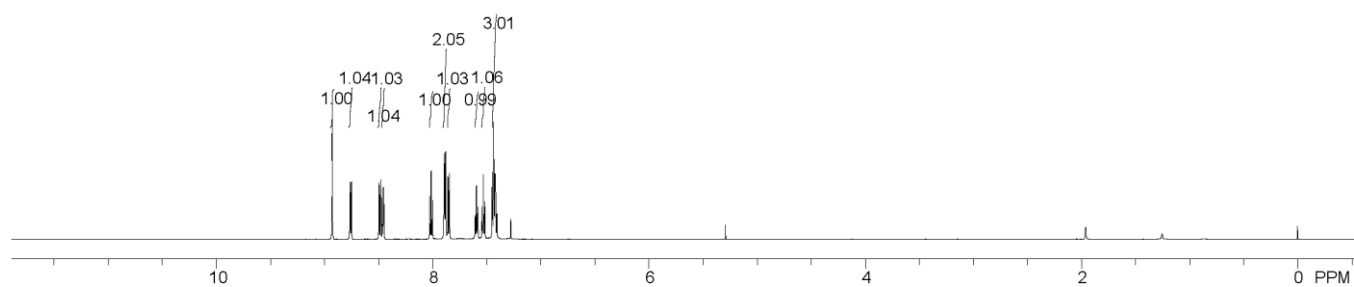

197.916  
182.085  
150.002  
147.603  
136.548  
136.074  
134.601  
133.486  
133.216  
132.666  
132.793  
131.305  
130.817  
130.496  
130.438  
130.146  
129.147  
129.038  
128.841  
128.717  
123.131  
77.302  
77.091  
76.879

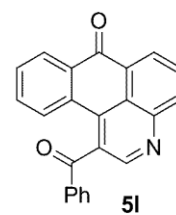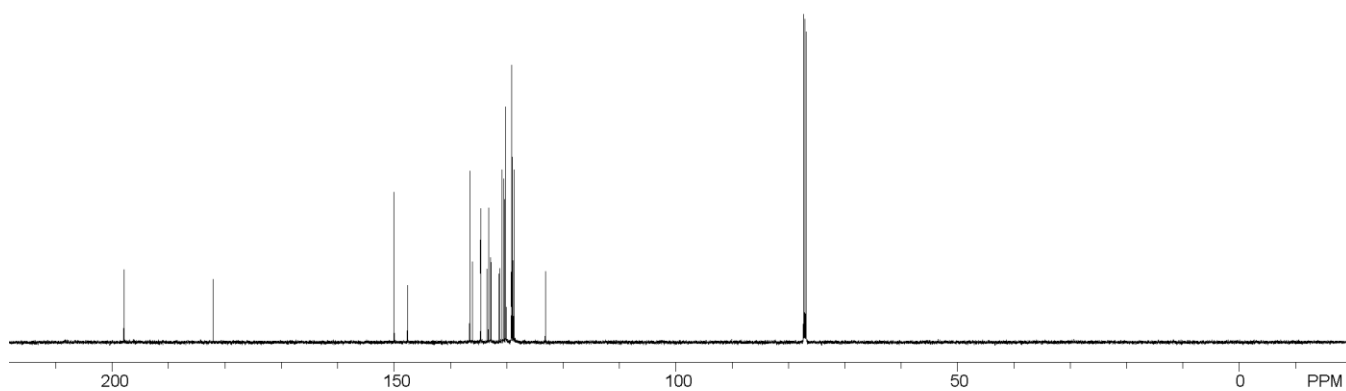



## VI. Copies of $^1\text{H}$ and $^{13}\text{C}$ NMR spectra of intermediates C, D and G

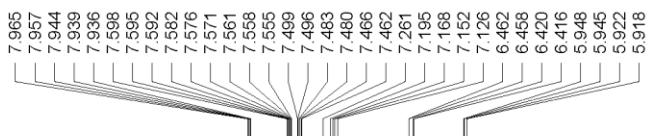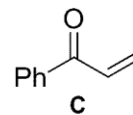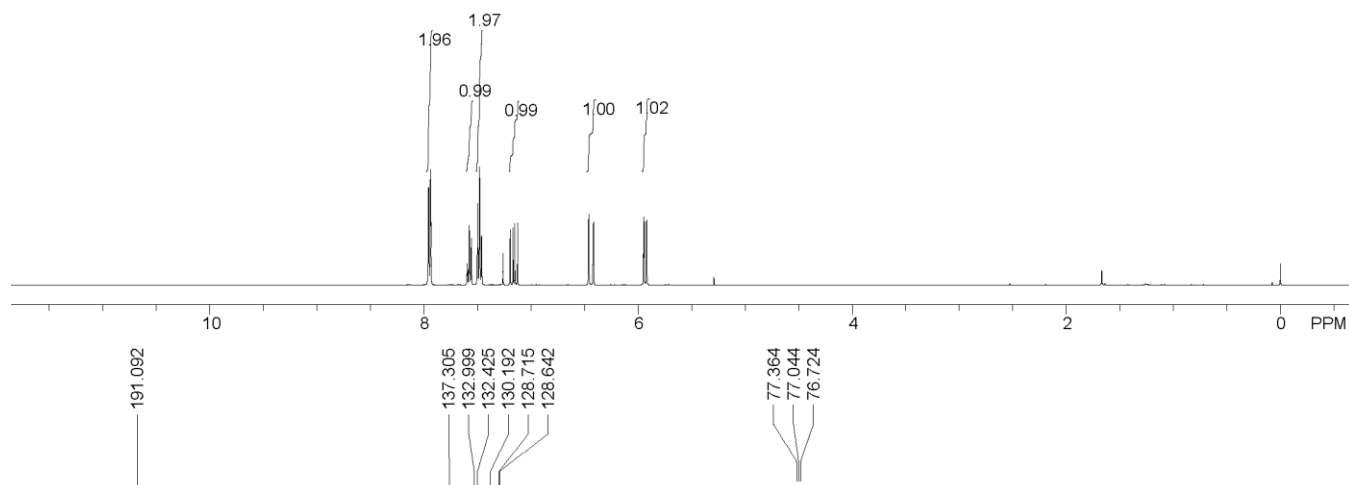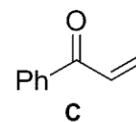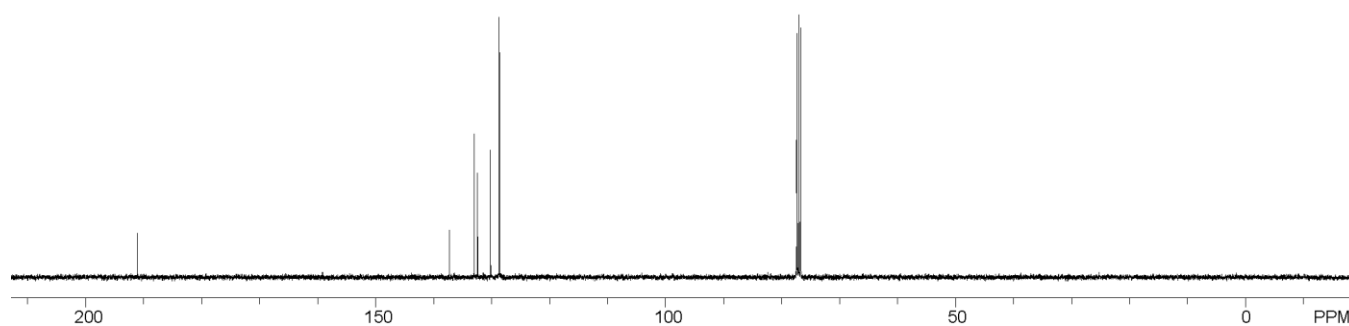

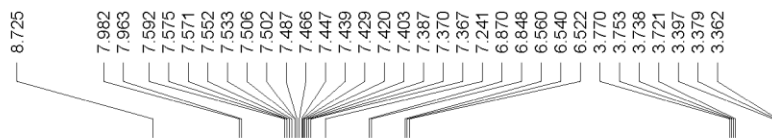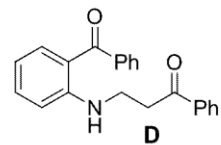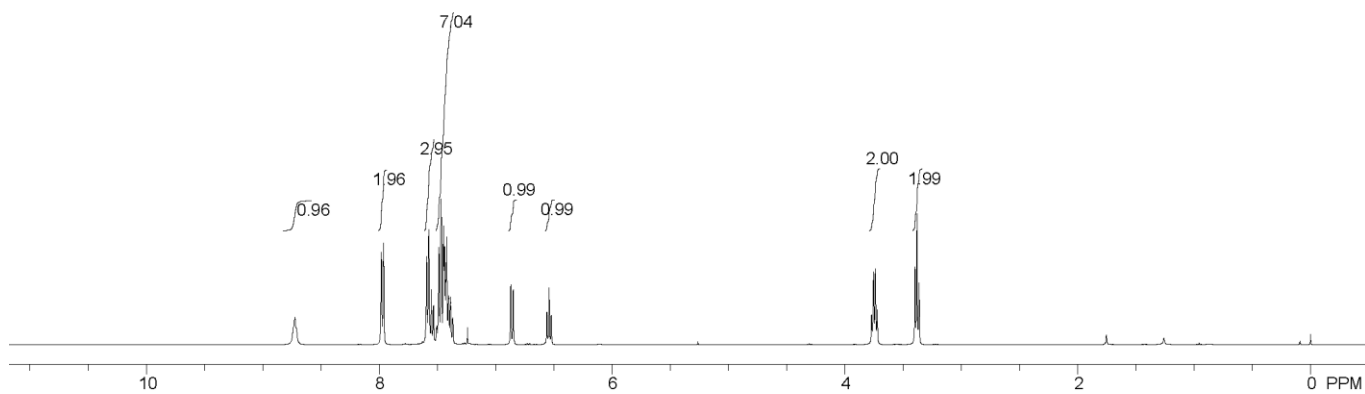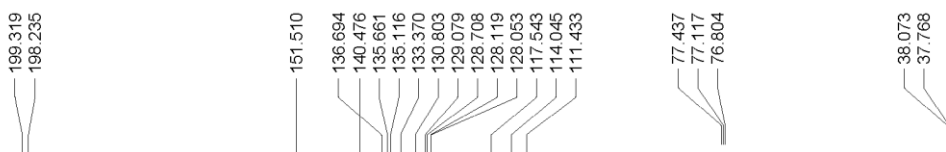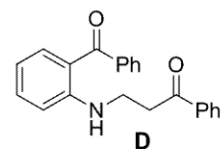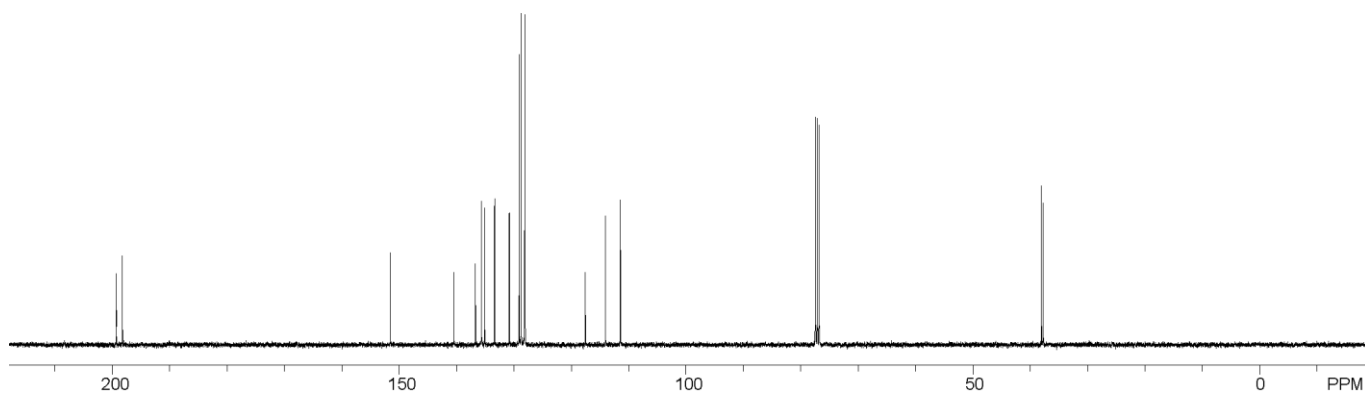

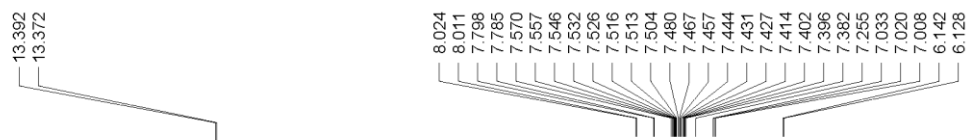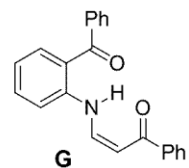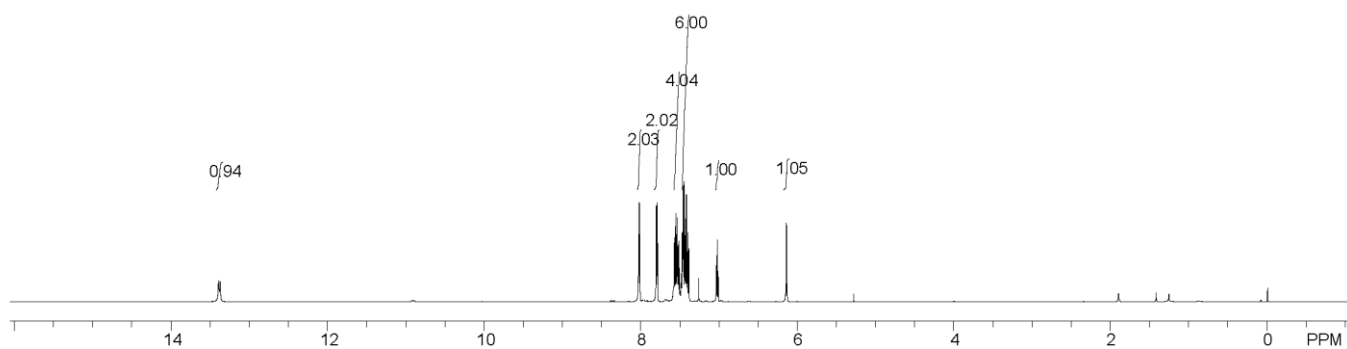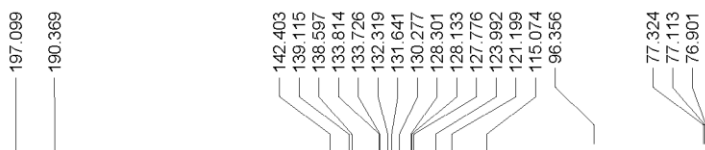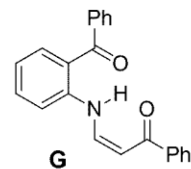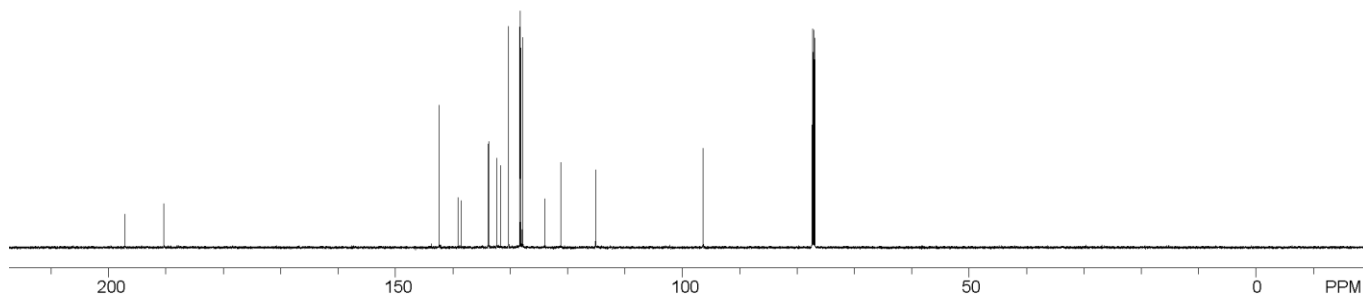

Supplement: c6qo00817h1.pdf [file c6qo00817h1.pdf]
